# Supplementary material for: Online dissemination of Cochrane reviews on digital health technologies: a cross-sectional study
Source: Springer Nature journal article supplement (doi:10.1186/s13643-024-02557-6), 2024-05-15
Supplement: MOESM5 [file 27095432]

# [1] Aali, Kariotis and Shokraneh (2020) Avatar Therapy for people with schizophrenia or related disorders



**21**

About this Attention Score

In the top 25% of all research outputs scored by Altmetric

MORE...

Mentioned by

- 1 news outlet
- 1 policy source
- 10 tweeters
- 1 Facebook page
- 1 Wikipedia page
- 1 video uploader

Citations

- 19 Dimensions

Readers on

- 240 Mendeley

**SUMMARY** | News | Policy documents | Twitter | Facebook | Wikipedia | Video | Dimensions citations

**Title** Avatar Therapy for people with schizophrenia or related disorders

**Published in** Cochrane database of systematic reviews, May 2020

**DOI** 10.1002/14651858.cd011898.pub2 [↗](#)

**Pubmed ID** 32413166 [↗](#)

**Authors** Ghazaleh Aali, Timothy Kariotis, Farhad Shokraneh

**TWITTER DEMOGRAPHICS** | MENDELEY READERS

The data shown below were collected from the profiles of **10** tweeters who shared this research output. [Click here to find out more about how the inform](#)



1 2

Cochrane Database of Systematic Reviews | [Review - Intervention](#)

## Avatar Therapy for people with schizophrenia or related disorders

✉ [Ghazaleh Aali, Timothy Kariotis, Farhad Shokraneh](#) Authors' declarations of interest

Version published: 08 May 2020 [Version history](#)

<https://doi.org/10.1002/14651858.CD011898.pub2> [↗](#)

Download PDF [↕](#)

[↻](#) Cite this Review

[🖨](#) Print | [💬](#) Comment | [🔗](#) Share | [+](#) Follow

 score 0 [Cited in 1 guideline](#)

[Collapse all](#) [Expand all](#)

[2] Adler, Martin, Mariani, Tajer, Owolabi, Free, Serrano, Casas and Perel (2017) Mobile phone text messaging to improve medication adherence in secondary prevention of cardiovascular disease



**27**

**About this Attention Score**

In the top 25% of all research outputs scored by Altmetric

**Mentioned by**

- 1 blog
- 2 policy sources
- 17 tweeters
- 3 Wikipedia pages

**Citations**

- 116 Dimensions

**Readers on**

- 446 Mendeley

**SUMMARY** | Blogs | Policy documents | Twitter | Wikipedia | Dimensions citations

---

**Title** Mobile phone text messaging to improve medication adherence in secondary prevention of cardiovascular disease

**Published in** Cochrane database of systematic reviews, April 2017

**DOI** 10.1002/14651858.cd011851.pub2 [↗](#)

**Pubmed ID** 28455948 [↗](#)

**Authors** Alma J Adler, Nicole Martin, Javier Mariani, Carlos D Tajer, Onikepe O Owolabi, Caroline Free... [\[show\]](#)

**Abstract** Worldwide at least 100 million people are thought to have prevalent cardiovascular disease (CVD)... [\[show\]](#)

---

**TWITTER DEMOGRAPHICS** MENDELEY READERS

---

The data shown below were collected from the profiles of 17 tweeters who shared this research output. [Click here to find](#)



Cochrane Database of Systematic Reviews | [Review - Intervention](#)

## Mobile phone text messaging to improve medication adherence in secondary prevention of cardiovascular disease

✉ Alma J Adler, Nicole Martin, Javier Mariani, Carlos D Tajer, Onikepe O Owolabi, Caroline Free, Norma C Serrano, Juan P Casas, Pablo Perel Authors' declarations of interest

Version published: 29 April 2017 [Version history](#)

<https://doi.org/10.1002/14651858.CD011851.pub2> [↗](#)

[Download PDF](#)

[Cite this Review](#)

[Print](#)
[Comment](#)
[Share](#)
[Follow](#)


**Cited in 3 guidelines**

[3] Agarwal, Glenton, Henschke, Tamrat, Bergman, Fønhus, Mehl and Lewin (2020) Tracking health commodity inventory and notifying stock levels via mobile devices: a mixed methods systematic review



**10**

About this Attention Score

In the top 25% of all research outputs scored by Altmetric

Mentioned by

- 18 tweeters
- 1 Facebook page

Citations

- 12 Dimensions

Readers on

- 207 Mendeley

**SUMMARY** | Twitter | Facebook | Dimensions citations

**Title** Tracking health commodity inventory and notifying stock levels via mobile devices: a mixed methods systematic review

**Published in** Cochrane database of systematic reviews, October 2020

**DOI** 10.1002/14651858.cd012907.pub2 [↗](#)

**Authors** Smisha Agarwal, Claire Glenton, Nicholas Henschke, Tigest Tamrat, Hanna Bergman, Marita S Fønhus... [\[show\]](#)

**TWITTER DEMOGRAPHICS** | MENDELEY READERS

The data shown below were collected from the profiles of 18 tweeters who shared this research output. [Click here to](#)



Cochrane Database of Systematic Reviews | [Review - Intervention](#)

## Tracking health commodity inventory and notifying stock levels via mobile devices: a mixed methods systematic review

✉ Smisha Agarwal, Claire Glenton, Nicholas Henschke, Tigest Tamrat, Hanna Bergman, Marita S Fønhus, Garrett L Mehl, Simon Lewin Authors' declarations of interest

Version published: 28 October 2020 [Version history](#)

<https://doi.org/10.1002/14651858.CD012907.pub2> [↗](#)

Download PDF [↕](#)

Cite this Review

Print Comment Share Follow

Altmetric score 0

[4] Agarwal, Glenton, Tamrat, Henschke, Maayan, Fønhus, Mehl and Lewin (2021) Decision-support tools via mobile devices to improve quality of care in primary healthcare settings



**28**

**About this Attention Score**

In the top 25% of all research outputs scored by Altmetric

**Mentioned by** MORE...

- 1 blog
- 40 tweeters
- 1 Facebook page

**Citations**

- 12 Dimensions

**Readers on**

- 289 Mendeley

**SUMMARY** Blogs Twitter Facebook Dimensions citations

**Title** Decision-support tools via mobile devices to improve quality of care in primary healthcare settings

**Published in** Cochrane database of systematic reviews, July 2021

**DOI** 10.1002/14651858.cd012944.pub2

**Pubmed ID** 34314020

**Authors** Smisha Agarwal, Claire Glenton, Tigest Tamrat, Nicholas Henschke, Nicola Maayan, Marita S Fønhus... [show]

**TWITTER DEMOGRAPHICS** MENDELEY REA

The data shown below were collected from the profiles of 40 tweeters who shared this research output. [Click](#)



Cochrane Database of Systematic Reviews | [Review - Intervention](#)

## Decision-support tools via mobile devices to improve quality of care in primary healthcare settings

✉ Smisha Agarwal, Claire Glenton, Tigest Tamrat, Nicholas Henschke, Nicola Maayan, Marita S Fønhus, Garrett L Mehl, Simon Lewin Authors' declarations of interest

Version published: 27 July 2021 [Version history](#)

<https://doi.org/10.1002/14651858.CD012944.pub2>

Download PDF

Cite this Review

Print Comment Share Follow

Alt score 0

[5] Allida, Du, Xu, Prichard, Chang, Hickman, Davidson and Inglis (2020) mHealth education interventions in heart failure



**38**

**About this Attention Score**

In the top 5% of all research outputs scored by Altmetric

**Mentioned by**

- 69 tweeters
- 1 Facebook page

**Citations**

- 42 Dimensions

**Readers on**

- 498 Mendeley

**SUMMARY** | [Twitter](#) | [Facebook](#) | [Dimensions citations](#)

**Title** mHealth education interventions in heart failure

**Published in** Cochrane database of systematic reviews, July 2020

**DOI** 10.1002/14651858.cd011845.pub2 [↗](#)

**Pubmed ID** 32613635 [↗](#)

**Authors** Sabine Allida, Huiyun Du, Xiaoyue Xu, Roslyn Prichard, Sungwon Chang, Louise D Hickman, Patricia M... [\[show\]](#)

**TWITTER DEMOGRAPHICS** | [MENDELEY READ](#)

The data shown below were collected from the profiles of **69** tweeters who shared this research output. [Click here](#)



Cochrane Database of Systematic Reviews | [Review - Intervention](#)

## mHealth education interventions in heart failure

Sabine Allida, Huiyun Du, Xiaoyue Xu, Roslyn Prichard, Sungwon Chang, Louise D Hickman, Patricia M Davidson,

[✉ Sally C Inglis](#) Authors' declarations of interest

Version published: 02 July 2020 [Version history](#)

<https://doi.org/10.1002/14651858.CD011845.pub2> [↗](#)

[Download PDF](#)

[Cite this Review](#)

[Print](#) [Comment](#) [Share](#) [Follow](#)

[Altmetric score](#) 0 [Cited in 1 guideline](#)

[6] Ames, Glenton, Lewin, Tamrat, Akama and Leon (2019) Clients' perceptions and experiences of targeted digital communication accessible via mobile devices for reproductive, maternal, newborn, child, and adolescent health: a qualitative evidence synthesis



**26**

About this Attention Score

In the top 25% of all research outputs scored by Altmetric

Mentioned by

- 1 policy source
- 41 tweeters
- 4 Facebook pages

Citations

- 58 Dimensions

Readers on

- 625 Mendeley

**SUMMARY** | Policy documents | Twitter | Facebook | Dimensions citations

**Title** Clients' perceptions and experiences of targeted digital communication accessible via mobile devices for reproductive, maternal, newborn, child, and adolescent health: a qualitative evidence synthesis

**Published in** Cochrane database of systematic reviews, October 2019

**DOI** 10.1002/14651858.cd013447

**Pubmed ID** 31608981

**Authors** Heather MR Ames, Claire Glenton, Simon Lewin, Tigest Tamrat, Eliud Akama, Natalie Leon

**TWITTER DEMOGRAPHICS** | MENDELEY READERS

The data shown below were collected from the profiles of 41 tweeters who shared this research output. [Click here to find out more about how the information](#)



Cochrane Database of Systematic Reviews | Review - Qualitative

## Clients' perceptions and experiences of targeted digital communication accessible via mobile devices for reproductive, maternal, newborn, child, and adolescent health: a qualitative evidence synthesis

✉ Heather MR Ames, Claire Glenton, Simon Lewin, Tigest Tamrat, Eliud Akama, Natalie Leon | Authors' declarations of interest  
Version published: 14 October 2019 | Version history

Download PDF

Cite this Review

Print | Comment | Share | Follow

Altmetric score 0 | Cited in 3 guidelines

Contents

# [7] Ammenwerth, Neyer, Hörbst, Mueller, Siebert and Schnell-Inderst (2021) Adult patient access to electronic health records

## Adult patient access to electronic health records

Overview of attention for article published in Cochrane database of systematic reviews, February 2021

**22**

About this Attention Score

In the top 25% of all research outputs scored by Altmetric

Mentioned by

- 42 tweeters
- 2 Facebook pages

Citations

- 27 Dimensions

Readers on

- 381 Mendeley

**SUMMARY** | Twitter | Facebook | Dimensions citations

**Title** Adult patient access to electronic health records

**Published in** Cochrane database of systematic reviews, February 2021

**DOI** 10.1002/14651858.cd012707.pub2

**Pubmed ID** 33634854

**Authors** Elske Ammenwerth, Stefanie Neyer, Alexander Hörbst, Gerhard Mueller, Uwe Siebert, Petra Schnell-Inde... [show]

Twitter Demographics | Mendeley readers | Attention Score in Context

The data shown below were collected from the profiles of 42 tweeters who shared this research output. [Click here to find out more about how the informati](#)

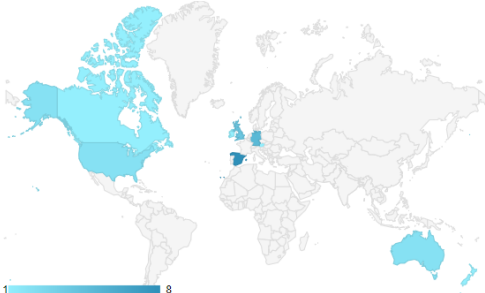

Download PDF

Cite this Review

Print | Comment | Share | Follow

Altmetric score 0

[8] Anglemyer, Moore, Parker, Chambers, Grady, Chiu, Parry, Wilczynska, Flemyng and Bero (2020)  
Digital contact tracing technologies in epidemics: a rapid review



**237**

About this Attention Score

In the top 5% of all research outputs scored by Altmetric

Mentioned by

- 9 news outlets
- 2 blogs
- 253 tweeters
- 5 Facebook pages
- 2 Wikipedia pages

Citations

- 145 Dimensions

Readers on

- 553 Mendeley

**SUMMARY** News Blogs Twitter Facebook Wikipedia Dimensions citations

**Title** Digital contact tracing technologies in epidemics: a rapid review

**Published in** Cochrane database of systematic reviews, August 2020

**DOI** 10.1002/14651858.cd013699

**PubMed ID** 33502000

**Authors** Andrew Anglemyer, Theresa HM Moore, Lisa Parker, Timothy Chambers, Alice Grady, Kellia Chiu... [show]

**TWITTER DEMOGRAPHICS** MENDELEY READERS

The data shown below were collected from the profiles of 253 tweeters who shared this research output. [Click here to find out](#)



Cochrane Database of Systematic Reviews | Review - Rapid

## Digital contact tracing technologies in epidemics: a rapid review

✉ Andrew Anglemyer, Theresa HM Moore, Lisa Parker, Timothy Chambers, Alice Grady, Kellia Chiu, Matthew Parry, Magdalena Wilczynska, Ella Flemyng, Lisa Bero Authors' declarations of interest

Version published: 18 August 2020 [Version history](#)

<https://doi.org/10.1002/14651858.CD013699>

Download PDF

Cite this Review

Print Comment Share Follow

Altmetric score 0



[9] Archambault, van de Belt, Kuziemyk, Plaisance, Dupuis, McGinn, Francois, Gagnon, Turgeon, Horsley and et al. (2017) Collaborative writing applications in healthcare: effects on professional practice and healthcare outcomes



**22**

**About this Attention Score**

In the top 25% of all research outputs scored by Altmetric

**Mentioned by**

- 33 tweeters
- 1 Google+ user

**Citations**

- 15 Dimensions

**Readers on**

- 412 Mendeley
- 1 CiteULike

[MORE...](#)

**SUMMARY** | Twitter | Google+ | Dimensions citations

**Title** Collaborative writing applications in healthcare: effects on professional practice and healthcare outcomes

**Published in** Cochrane database of systematic reviews, May 2017

**DOI** 10.1002/14651858.cd011388.pub2 [↗](#)

**Pubmed ID** 28489282 [↗](#)

**Authors** Patrick M Archambault, Tom H van de Belt, Craig Kuziemyk, Ariane Plaisance, Audrey Dupuis, Carrie... [\[show\]](#)

**Abstract** Collaborative writing applications (CWAs), such as wikis and Google Documents, hold the potential... [\[show\]](#)

**TWITTER DEMOGRAPHICS** | MENDELEY READERS

The data shown below were collected from the profiles of **33** tweeters who shared this research output. [Click here to](#)



Cochrane Database of Systematic Reviews | [Review - Intervention](#)

## Collaborative writing applications in healthcare: effects on professional practice and healthcare outcomes

✉ Patrick M Archambault, Tom H van de Belt, Craig Kuziemyk, Ariane Plaisance, Audrey Dupuis, Carrie A McGinn, Rebecca Francois, Marie-Pierre Gagnon, Alexis F Turgeon, Tanya Horsley, William Witteman, Julien Poitras, Jean Lapointe, Kevin Brand, Jean Lachaine, France Légaré [Authors' declarations of interest](#)

Version published: 10 May 2017 [Version history](#)

[Download PDF](#)

[Cite this Review](#)

[Print](#) [Comment](#) [Share](#) [Follow](#)

[Altmetric score](#) 0

[10] Arditi, Rège-Walther, Durieux and Burnand (2017) Computer-generated reminders delivered on paper to healthcare professionals: effects on professional practice and healthcare outcomes



15

About this Attention Score

In the top 25% of all research outputs scored by Altmetric

Mentioned by

- 20 tweeters
- 2 Wikipedia pages

Citations

- 63 Dimensions

Readers on

- 377 Mendeley
- 1 CiteULike

SUMMARY

Twitter

Wikipedia

Dimensions citations

**Title** Computer-generated reminders delivered on paper to healthcare professionals: effects on professional practice and healthcare outcomes

**Published in** Cochrane database of systematic reviews, July 2017

**DOI** 10.1002/14651858.cd001175.pub4

**Pubmed ID** 28681432

**Authors** Chantal Arditi, Myriam Rège-Walther, Pierre Durieux, Bernard Burnand

**Abstract** Clinical practice does not always reflect best practice and evidence, partly because of... [show]

TWITTER DEMOGRAPHICS

MENDELEY READERS

The data shown below were collected from the profiles of 20 tweeters who shared this research output. [Click here to find out more at](#)



Cochrane Database of Systematic Reviews | Review - Intervention

New search

## Computer-generated reminders delivered on paper to healthcare professionals: effects on professional practice and healthcare outcomes

✉ Chantal Arditi, Myriam Rège-Walther, Pierre Durieux, Bernard Burnand Authors' declarations of interest

Version published: 06 July 2017 Version history

<https://doi.org/10.1002/14651858.CD001175.pub4>

Download PDF

Cite this Review

Print Comment Share Follow

Am scores 0

Contents

[11] Atherton, Sawmynaden, Meyer and Car (2012) Email for the coordination of healthcare appointments and attendance reminders



**3**

**About this Attention Score**

Average Attention Score compared to outputs of the same age

**Mentioned by**  
4 tweeters

**Citations**  
37 Dimensions

**Readers on**  
149 Mendeley

| SUMMARY             | Twitter                                                                                                                   | Dimensions citations |
|---------------------|---------------------------------------------------------------------------------------------------------------------------|----------------------|
| <b>Title</b>        | Email for the coordination of healthcare appointments and attendance reminders                                            |                      |
| <b>Published in</b> | Cochrane database of systematic reviews, August 2012                                                                      |                      |
| <b>DOI</b>          | 10.1002/14651858.cd007981.pub2 <a href="#">↗</a>                                                                          |                      |
| <b>Pubmed ID</b>    | 22895971 <a href="#">↗</a>                                                                                                |                      |
| <b>Authors</b>      | Helen Atherton, Prescilla Sawmynaden, Barbara Meyer, Josip Car                                                            |                      |
| <b>Abstract</b>     | Email is a popular and commonly-used method of communication, but its use in health care is not... <a href="#">[show]</a> |                      |

**TWITTER DEMOGRAPHICS**

---

The data shown below were collected from the profiles of 4 tweeters who shared this research output. [Click here to](#)



**MENDELEY READERS**

Cochrane Database of Systematic Reviews | [Review - Intervention](#)

## Email for the coordination of healthcare appointments and attendance reminders

[✉ Helen Atherton, Prescilla Sawmynaden, Barbara Meyer, Josip Car](#) Authors' declarations of interest

Version published: 15 August 2012 [Version history](#)

<https://doi.org/10.1002/14651858.CD007981.pub2> [↗](#)

[Collapse all](#) [Expand all](#)

Unlock the full review [➤](#)

[Download PDF](#)

[Cite this Review](#)

[Print](#)
[Comment](#)
[Share](#)
[Follow](#)


score
0

[12] Atherton, Sawmynaden, Sheikh, Majeed and Car (2012) Email for clinical communication between patients/caregivers and healthcare professionals



**35**

**About this Attention Score**

In the top 5% of all research outputs scored by Altmetric

**Mentioned by**

- 2 blogs
- 29 tweeters
- 1 Facebook page
- 2 Wikipedia pages

**Citations**

- 103 Dimensions

**Readers on**

- 343 Mendeley

**SUMMARY** | Blogs | Twitter | Facebook | Wikipedia | Dimensions citations

**Title** Email for clinical communication between patients/caregivers and healthcare professionals

**Published in** Cochrane database of systematic reviews, November 2012

**DOI** 10.1002/14651858.cd007978.pub2 [↗](#)

**Pubmed ID** 23152249 [↗](#)

**Authors** Helen Atherton, Prescilla Sawmynaden, Aziz Sheikh, Azeem Majeed, Josip Car

**Abstract** Email is a popular and commonly-used method of communication, but its use in health care is not... [\[show\]](#)

---

**TWITTER DEMOGRAPHICS** MENDELEY READERS

The data shown below were collected from the profiles of 29 tweeters who shared this research output. [Click here to fit](#)



Cochrane Database of Systematic Reviews | [Review - Intervention](#)

## Email for clinical communication between patients/caregivers and healthcare professionals

✉ Helen Atherton, Prescilla Sawmynaden, Aziz Sheikh, Azeem Majeed, Josip Car [Authors' declarations of interest](#)

Version published: 14 November 2012 [Version history](#)

<https://doi.org/10.1002/14651858.CD007978.pub2> [↗](#)

[Collapse all](#) [Expand all](#)

[Unlock the full review](#) [➤](#)

[Download PDF](#)

[Cite this Review](#)

[Print](#)
[Comment](#)
[Share](#)
[Follow](#)

Alt score 0

[13] Badawy, Morrone, Thompson and Palermo (2019) Computer and mobile technology interventions to promote medication adherence and disease management in people with thalassemia



Mentioned by  
1 tweeter

Citations  
13 Dimensions

Readers on  
244 Mendeley

**SUMMARY**    Twitter    Dimensions citations

**Title**    Computer and mobile technology interventions to promote medication adherence and disease management in people with thalassemia

**Published in**    Cochrane database of systematic reviews, June 2019

**DOI**    10.1002/14651858.cd012900.pub2 [↗](#)

**Pubmed ID**    31250923 [↗](#)

**Authors**    Sherif Badawy, Kerry Morrone, Alexis Thompson, Tonya Palermo

**TWITTER DEMOGRAPHICS**    MENDELEY READERS

The data shown below were collected from the profile of 1 tweeter who shared this research output. [Click here to find out more ab](#)



Cochrane Database of Systematic Reviews | [Review - Intervention](#)

## Computer and mobile technology interventions to promote medication adherence and disease management in people with thalassemia

✉ [Sherif M Badawy, Kerry Morrone, Alexis Thompson, Tonya M Palermo](#)    Authors' declarations of interest

Version published: 28 June 2019    [Version history](#)

<https://doi.org/10.1002/14651858.CD012900.pub2> [↗](#)

Download PDF [↕](#)

[↻](#) Cite this Review

[🖨](#) Print    [💬](#) Comment    [🔗](#) Share    [+](#) Follow

 0

Contents

# [14] Bahar-Fuchs, Martyr, Goh, Sabates and Clare (2019) Cognitive training for people with mild to moderate dementia



**90**

About this Attention Score

In the top 5% of all research outputs scored by Altmetric

MORE...

Mentioned by

- 3 news outlets
- 1 blog
- 1 policy source
- 86 tweeters
- 1 Facebook page
- 1 Wikipedia page

Citations

- 173 Dimensions

Readers on

- 635 Mendeley

**SUMMARY** News Blogs Policy documents Twitter Facebook Wikipedia Dimensions citations

**Title** Cognitive training for people with mild to moderate dementia

**Published in** Cochrane database of systematic reviews, March 2019

**DOI** 10.1002/14651858.cd013069.pub2

**Pubmed ID** 30909318

**Authors** Alex Bahar-Fuchs, Anthony Martyr, Anita MY Goh, Julieta Sabates, Linda Clare

**TWITTER DEMOGRAPHICS** MENDELEY READERS

The data shown below were collected from the profiles of **86** tweeters who shared this research output. [Click here to find out more about how the inform](#)



1 20

Cochrane Database of Systematic Reviews | [Review - Intervention](#)

## Cognitive training for people with mild to moderate dementia

[✉ Alex Bahar-Fuchs, Anthony Martyr, Anita MY Goh, Julieta Sabates, Linda Clare](#) Authors' declarations of interest

Version published: 25 March 2019 [Version history](#)

<https://doi.org/10.1002/14651858.CD013069.pub2>

Download PDF

Cite this Review

Print Comment Share Follow

Alt score 0

Cited in 7 guidelines

[Collapse all](#) [Expand all](#)

[15] Bailey, Murray, Rait, Mercer, Morris, Peacock, Cassell and Nazareth (2010) Interactive computer-based interventions for sexual health promotion



**23**

About this Attention Score

In the top 25% of all research outputs scored by Altmetric

Mentioned by

- 3 blogs
- 1 policy source
- 2 tweeters
- 3 Facebook pages

Citations

- 157 Dimensions

Readers on

- 373 Mendeley
- 1 Connotea

SUMMARY
Blogs
Policy documents
Twitter
Facebook
Dimensions citations

**Title** Interactive computer-based interventions for sexual health promotion

**Published in** Cochrane database of systematic reviews, September 2010

**DOI** 10.1002/14651858.cd006483.pub2 [↗](#)

**Pubmed ID** 20824850 [↗](#)

**Authors** Julia V Bailey, Elizabeth Murray, Greta Rait, Catherine H Mercer, Richard W Morris, Richard Peacock... [\[show\]](#)

**Abstract** Sexual health promotion is a major public health challenge; there is huge potential for health... [\[show\]](#)

**TWITTER DEMOGRAPHICS**

The data shown below were collected from the profiles of 2 tweeters who shared this research output. [Click here to find out](#)



**MENDELEY READERS**

Cochrane Database of Systematic Reviews | [Review - Intervention](#)

## Interactive computer-based interventions for sexual health promotion

✉ [Julia V Bailey](#), [Elizabeth Murray](#), [Greta Rait](#), [Catherine H Mercer](#), [Richard W Morris](#), [Richard Peacock](#), [Jackie Cassell](#), [Irwin Nazareth](#) Authors' declarations of interest

Version published: 08 September 2010 [Version history](#)

<https://doi.org/10.1002/14651858.CD006483.pub2> [↗](#)

[Unlock the full review](#) ➤

Download PDF
▼

↻ Cite this Review

Print
 Comment
 Share
 Follow

score 0
Cited in 2 guidelines

Collapse all Expand all

[16] Barth, Jacob, Daha and Critchley (2015) Psychosocial interventions for smoking cessation in patients with coronary heart disease



**11**

About this Attention Score

In the top 25% of all research outputs scored by Altmetric

Mentioned by

- 1 policy source
- 12 tweeters
- 4 Facebook pages

Citations

- 53 Dimensions

Readers on

- 418 Mendeley

**SUMMARY** | Policy documents | Twitter | Facebook | Dimensions citations

**Title** Psychosocial interventions for smoking cessation in patients with coronary heart disease

**Published in** Cochrane database of systematic reviews, July 2015

**DOI** 10.1002/14651858.cd006886.pub2

**Pubmed ID** 26148115

**Authors** Jürgen Barth, Tiffany Jacob, Ioana Daha, Julia A Critchley

**Abstract** This is an update of a Cochrane review previously published in 2008. Smoking increases the risk of... [show]

**TWITTER DEMOGRAPHICS** | MENDELEY READERS

The data shown below were collected from the profiles of 12 tweeters who shared this research output. [Click here to find](#)



Cochrane Database of Systematic Reviews | [Review - Intervention](#)

[New search](#)

## Psychosocial interventions for smoking cessation in patients with coronary heart disease

✉ Jürgen Barth, Tiffany Jacob, Ioana Daha, Julia A Critchley [Authors' declarations of interest](#)

Version published: 06 July 2015 [Version history](#)

<https://doi.org/10.1002/14651858.CD006886.pub2>

Download PDF

Cite this Review

Print Comment Share Follow

Alt score 0 [Cited in 10 guidelines](#)

Contents



[17] Beishon, Elliott, Hietamies, Mc Ardle, O'Mahony, Elliott and Quinn (2022) Diagnostic test accuracy of remote, multidomain cognitive assessment (telephone and video call) for dementia



**40**

About this Attention Score

In the top 5% of all research outputs scored by Altmetric

Mentioned by

- 1 news outlet
- 2 blogs
- 41 tweeters
- 2 Facebook pages

Citations

- 2 Dimensions

Readers on

- 70 Mendeley

**SUMMARY** News Blogs Twitter Facebook Dimensions citations

**Title** Diagnostic test accuracy of remote, multidomain cognitive assessment (telephone and video call) for dementia

**Published in** Cochrane database of systematic reviews, April 2022

**DOI** 10.1002/14651858.cd013724.pub2

**Pubmed ID** 35395108

**Authors** Lucy C Beishon, Emma Elliott, Tuuli M Hietamies, Riona Mc Ardle, Aoife O'Mahony, Amy R Elliott... [show]

**TWITTER DEMOGRAPHICS** MENDELEY READERS

The data shown below were collected from the profiles of 41 tweeters who shared this research output. [Click here to](#)



Cochrane Database of Systematic Reviews [Review - Diagnostic](#)

### Diagnostic test accuracy of remote, multidomain cognitive assessment (telephone and video call) for dementia

✉ Lucy C Beishon, Emma Elliott, Tuuli M Hietamies, Riona Mc Ardle, Aoife O'Mahony, Amy R Elliott, Terry J Quinn  
Authors' declarations of interest

Version published: 08 April 2022 [Version history](#)

<https://doi.org/10.1002/14651858.CD013724.pub2>

Download PDF

Cite this Review

Print Comment Share Follow

Altmetric scores 0

Contents

## [18] Bittner, Yoshinaga, Rittiphairoj and Li (2023) Telerehabilitation for people with low vision

We haven't seen any mentions of this research output yet!

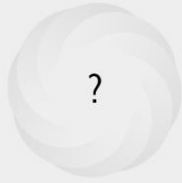

This is an [Altmetric](#) details page, which will display any online attention and activity that we pick up for this research output. Altmetric looks for relevant mentions in social media sites, newspapers, policy documents, blogs, Wikipedia, and [many other sources](#).

You can look at a [populated Details Page](#) that demonstrates the types of attention we track at Altmetric.

So far, we haven't found any mentions of this research output. Please check back again later to see if anything has changed.

If you think we might be missing a mention, please [fill in this form](#) in this form and a member of our team will get back to you. You can also reach us on Twitter at [@altmetric](#).

Want to be alerted when we find any activity for this research output? Click on the button below to receive an e-mail alert when this research output is shared for the first time.

Alert me when this research output is mentioned

Cochrane Database of Systematic Reviews | [Review - Intervention](#)

[New search](#)

[Conclusions changed](#)

### Telerehabilitation for people with low vision

[✉](#) [Ava K Bittner](#), [Patrick D Yoshinaga](#), [Thanitsara Rittiphairoj](#), [Tianjing Li](#) [Authors' declarations of interest](#)

Version published: 13 January 2023 [Version history](#)

<https://doi.org/10.1002/14651858.CD011019.pub4>

[Unlock the full review](#)

[Download PDF](#)

[Cite this Review](#)

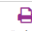

Print

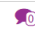

Comment

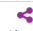

Share

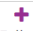

Follow

[Alt score](#) 0

[Collapse all](#) [Expand all](#)

#### Abstract

[19] Bunn, Byrne and Kendall (2004) Telephone consultation and triage: effects on health care use and patient satisfaction



**18**

**About this Attention Score**

In the top 25% of all research outputs scored by Altmetric

**Mentioned by** MORE...

- 1 blog
- 4 policy sources

**Citations**

- 193 Dimensions

**Readers on**

- 387 Mendeley
- 3 CiteULike

**SUMMARY** | Blogs | Policy documents | Dimensions citations

**Title** Telephone consultation and triage: effects on health care use and patient satisfaction

**Published in** Cochrane database of systematic reviews, July 2004

**DOI** 10.1002/14651858.cd004180.pub2 [↗](#)

**Pubmed ID** 15495083 [↗](#)

**Authors** Frances Bunn, Geraldine Byrne, Sally Kendall

**MENDELEY READERS**

The data shown below were compiled from readership statistics for **387** Mendeley readers



Cochrane Database of Systematic Reviews | [Review - Intervention](#)

## Telephone consultation and triage: effects on health care use and patient satisfaction

✉ [Frances Bunn, Geraldine Byrne, Sally Kendall](#) [Authors' declarations of interest](#)

Version published: 19 July 2004 [Version history](#)

<https://doi.org/10.1002/14651858.CD004180.pub2> [↗](#)

[Collapse all](#) [Expand all](#)

**Unlock the full review** [>](#)

[Download PDF](#)

[Cite this Review](#)

[Print](#) [Comment](#) [Share](#) [Follow](#)

 0

## [20] Boyle, Solberg and Fiore (2014) Use of electronic health records to support smoking cessation

### Use of electronic health records to support smoking cessation

Overview of attention for article published in Cochrane database of systematic reviews, December 2014

**10**

About this Attention Score

In the top 25% of all research outputs scored by Altmetric

Mentioned by

- 1 policy source
- 14 tweeters

Citations

- 85 Dimensions

Readers on

- 184 Mendeley

**SUMMARY** | Policy documents | Twitter | Dimensions citations

**Title** Use of electronic health records to support smoking cessation

**Published in** Cochrane database of systematic reviews, December 2014

**DOI** 10.1002/14651858.cd008743.pub3 [↗](#)

**Pubmed ID** 25547090 [↗](#)

**Authors** Raymond Boyle, Leif Solberg, Michael Fiore

**Abstract** Health information systems such as electronic health records (EHR), computerized decision support... [\[show\]](#)

[Twitter Demographics](#) | [Mendeley readers](#) | [Attention Score in Context](#)

The data shown below were collected from the profiles of 14 tweeters who shared this research output. [Click here to find out more about how the](#)



Download PDF

Cite this Review

Print | Comment | Share | Follow

Altmetric score 0

Cited in 2 guidelines

[21] Burge, Cox, Abramson and Holland (2020) Interventions for promoting physical activity in people with chronic obstructive pulmonary disease (COPD)



**30**

About this Attention Score

In the top 5% of all research outputs scored by Altmetric

Mentioned by

- 1 blog
- 38 tweeters
- 2 Facebook pages

Citations

- 86 Dimensions

Readers on

- 517 Mendeley

**SUMMARY** Blogs Twitter Facebook Dimensions citations

**Title** Interventions for promoting physical activity in people with chronic obstructive pulmonary disease (COPD)

**Published in** Cochrane database of systematic reviews, April 2020

**DOI** 10.1002/14651858.cd012626.pub2

**Pubmed ID** 32297320

**Authors** Angela T Burge, Narelle S Cox, Michael J Abramson, Anne E Holland

**TWITTER DEMOGRAPHICS** MENDELEY RE

The data shown below were collected from the profiles of **38** tweeters who shared this research output. [Click](#)



Cochrane Database of Systematic Reviews | [Review - Intervention](#)

## Interventions for promoting physical activity in people with chronic obstructive pulmonary disease (COPD)

✉ [Angela T Burge](#), [Narelle S Cox](#), [Michael J Abramson](#), [Anne E Holland](#) Authors' declarations of interest

Version published: 16 April 2020 [Version history](#)

<https://doi.org/10.1002/14651858.CD012626.pub2>

Download PDF

Cite this Review

Print Comment Share Follow

Alt score 0 Cited in 1 guideline

## [22] Car, Lang, Colledge, Ung and Majeed (2011) Interventions for enhancing consumers' online health literacy



**13**

About this Attention Score

In the top 25% of all research outputs scored by Altmetric

Mentioned by

- 2 policy sources
- 9 tweeters
- 1 Facebook page

Citations

- 88 Dimensions

Readers on

- 504 Mendeley
- 2 CiteULike

**SUMMARY** | Policy documents | Twitter | Facebook | Dimensions citations

**Title** Interventions for enhancing consumers' online health literacy

**Published in** Cochrane database of systematic reviews, June 2011

**DOI** 10.1002/14651858.cd007092.pub2 [↗](#)

**Pubmed ID** 21678364 [↗](#)

**Authors** Josip Car, Britta Lang, Anthea Colledge, Chuin Ung, Azeem Majeed

**TWITTER DEMOGRAPHICS** | MENDELEY READERS

The data shown below were collected from the profiles of 9 tweeters who shared this research output. [Click here to find out more](#)



[Cochrane Database of Systematic Reviews](#) | [Review - Intervention](#)

### Interventions for enhancing consumers' online health literacy

✉ [Josip Car, Britta Lang, Anthea Colledge, Chuin Ung, Azeem Majeed](#) Authors' declarations of interest

Version published: 15 June 2011 [Version history](#)

<https://doi.org/10.1002/14651858.CD007092.pub2> [↗](#)

[Collapse all](#) [Expand all](#)

**Abstract** [↕](#)

**Unlock the full review** [➔](#)

Download PDF [▼](#)

[↻](#) Cite this Review

[🖨](#) Print [💬](#) Comment [🔗](#) Share [+](#) Follow

 0

[23] Chan, De Simoni, Wileman, Holliday, Newby, Chisari, Ali, Zhu, Padakanti, Pinprachanan and et al. (2022) Digital interventions to improve adherence to maintenance medication in asthma



**134**

About this Attention Score

In the top 5% of all research outputs scored by Altmetric

Mentioned by

- 14 news outlets
- 2 blogs
- 41 tweeters
- 2 Facebook pages

Citations

- 11 Dimensions

Readers on

- 113 Mendeley

**SUMMARY** News Blogs Twitter Facebook Dimensions citations

**Title** Digital interventions to improve adherence to maintenance medication in asthma

**Published in** Cochrane database of systematic reviews, June 2022

**DOI** 10.1002/14651858.cd013030.pub2

**Pubmed ID** 35691614

**Authors** Amy Chan, Anna De Simoni, Vari Wileman, Lois Holliday, Chris J Newby, Claudia Chisari, Sana Ali... [show]

**TWITTER DEMOGRAPHICS** MENDELEY F

The data shown below were collected from the profiles of **41** tweeters who shared this research output.



Cochrane Database of Systematic Reviews | Review - Intervention

## Digital interventions to improve adherence to maintenance medication in asthma

Amy Chan, Anna De Simoni, Vari Wileman, Lois Holliday, Chris J Newby, Claudia Chisari, Sana Ali, Natalee Zhu, Prathima Padakanti, Vasita Pinprachanan, Victoria Ting, Chris J Griffiths Authors' declarations of interest

Version published: 13 June 2022 Version history

<https://doi.org/10.1002/14651858.CD013030.pub2>

Download PDF

Cite this Review

Print Comment Share Follow

Alt score 0 Cited in 1 guideline

[24] Chuchu, Dinnes, Takwoingi, Matin, Bayliss, Davenport, Moreau, Bassett, Godfrey, O'Sullivan and et al. (2018) Teledermatology for diagnosing skin cancer in adults



**20**

About this Attention Score

In the top 25% of all research outputs scored by Altmetric

Mentioned by

- 1 news outlet
- 1 policy source
- 6 tweeters
- 1 Facebook page
- 1 Wikipedia page

Citations

- 108 Dimensions

Readers on

- 438 Mendeley

**SUMMARY** News Policy documents Twitter Facebook Wikipedia Dir

**Title** Teledermatology for diagnosing skin cancer in adults

**Published in** Cochrane database of systematic reviews, December 2018

**DOI** 10.1002/14651858.cd013193

**PubMed ID** 30521686

**Authors** Naomi Chuchu, Jacqueline Dinnes, Yemisi Takwoingi, Rubeta N Matin, Susan E Bayliss, Clare Davenport... [show]

**TWITTER DEMOGRAPHICS** MENDELEY READERS

The data shown below were collected from the profiles of 6 tweeters who shared this research output. [Click here to](#)



Cochrane Database of Systematic Reviews | Review - Diagnostic

## Teledermatology for diagnosing skin cancer in adults

Naomi Chuchu, Jacqueline Dinnes, Yemisi Takwoingi, Rubeta N Matin, Susan E Bayliss, Clare Davenport, Jacqueline F Moreau, Oliver Bassett, Kathie Godfrey, Colette O'Sullivan, Fiona M Walter, Richard Motley, Jonathan J Deeks, Hywel C Williams, Cochrane Skin Cancer Diagnostic Test Accuracy Group Authors' declarations of interest

Version published: 04 December 2018 Version history

<https://doi.org/10.1002/14651858.CD013193>

Download PDF

Cite this Review

Print Comment Share Follow

Alt score 0



[25] Chuchu, Takwoingi, Dinnes, Matin, Bassett, Moreau, Bayliss, Davenport, Godfrey, O'Connell and et al. (2018) Smartphone applications for triaging adults with skin lesions that are suspicious for melanoma



**92**

**About this Attention Score**

In the top 5% of all research outputs scored by Altmetric

**Mentioned by**

- 7 news outlets
- 2 blogs
- 1 policy source
- 25 tweeters
- 2 Facebook pages
- 2 Wikipedia pages
- 1 Google+ user

**Citations**

- 100 Dimensions

**Readers on**

- 426 Mendeley

**SUMMARY** | News | Blogs | Policy documents | Twitter | Facebook | Wikipedia

**Title** Smartphone applications for triaging adults with skin lesions that are suspicious for melanoma

**Published in** Cochrane database of systematic reviews, December 2018

**DOI** 10.1002/14651858.cd013192

**Pubmed ID** 30521685

**Authors** Naomi Chuchu, Yemisi Takwoingi, Jacqueline Dinnes, Rubeta N Matin, Oliver Bassett, Jacqueline F... [show]

---

**TWITTER DEMOGRAPHICS** | MENDELEY READERS

The data shown below were collected from the profiles of **25** tweeters who shared this research output. [Click here to find](#)



1  6

**Geographical breakdown** | **Demographic breakdown**

Cochrane Database of Systematic Reviews | [Review - Diagnostic](#)

## Smartphone applications for triaging adults with skin lesions that are suspicious for melanoma

Naomi Chuchu, Yemisi Takwoingi, [✉ Jacqueline Dinnes](#), Rubeta N Matin, Oliver Bassett, Jacqueline F Moreau, Susan E Bayliss, Clare Davenport, Kathie Godfrey, Susan O'Connell, Abhilash Jain, Fiona M Walter, Jonathan J Deeks, Hywel C Williams, Cochrane Skin Cancer Diagnostic Test Accuracy Group Authors' declarations of interest

Version published: 04 December 2018 [Version history](#)

Download PDF

Cite this Review

Print | Comment | Share | Follow

Altmetric score 0

[26] Corry, Neenan, Brabyn, Sheaf and Smith (2019) Telephone interventions, delivered by healthcare professionals, for providing education and psychosocial support for informal caregivers of adults with diagnosed illnesses



**36**

About this Attention Score

In the top 5% of all research outputs scored by Altmetric

Mentioned by

- 1 news outlet
- 1 blog
- 39 tweeters
- 1 Facebook page

Citations

- 20 Dimensions

Readers on

- 604 Mendeley

**SUMMARY** | News | Blogs | Twitter | Facebook | Dimensions citations

**Title** Telephone interventions, delivered by healthcare professionals, for providing education and psychosocial support for informal caregivers of adults with diagnosed illnesses

**Published in** Cochrane database of systematic reviews, May 2019

**DOI** 10.1002/14651858.cd012533.pub2

**Pubmed ID** 31087641

**Authors** Margarita Corry, Kathleen Neenan, Sally Brabyn, Greg Sheaf, Valerie Smith

---

**TWITTER DEMOGRAPHICS** | MENDELEY READERS

The data shown below were collected from the profiles of 39 tweeters who shared this research output. [Click here to find out more about how the infor](#)



Cochrane Database of Systematic Reviews | [Review - Intervention](#)

## Telephone interventions, delivered by healthcare professionals, for providing education and psychosocial support for informal caregivers of adults with diagnosed illnesses

✉ Margarita Corry, Kathleen Neenan, Sally Brabyn, Greg Sheaf, Valerie Smith | Authors' declarations of interest

Version published: 14 May 2019 | [Version history](#)

<https://doi.org/10.1002/14651858.CD012533.pub2>

Download PDF

Cite this Review

Print | Comment | Share | Follow

Altmetric score 0 | Cited in 1 guideline

Contents

[27] Cox, Dal Corso, Hansen, McDonald, Hill, Zanaboni, Alison, O'Halloran, Macdonald and Holland (2021) Telerehabilitation for chronic respiratory disease



**36**

[About this Attention Score](#)

In the top 5% of all research outputs scored by Altmetric

**Mentioned by**

- 1 blog
- 1 policy source
- 41 tweeters
- 2 Facebook pages
- 2 Wikipedia pages

**Citations**

- 150 Dimensions

**Readers on**

- 438 Mendeley

**SUMMARY**    Blogs    Policy documents    Twitter    Facebook    Wikipedia

---

**Title**    Telerehabilitation for chronic respiratory disease

**Published in**    Cochrane database of systematic reviews, January 2021

**DOI**    10.1002/14651858.cd013040.pub2 [↗](#)

**Pubmed ID**    33511633 [↗](#)

**Authors**    Narelle S Cox, Simone Dal Corso, Henrik Hansen, Christine F McDonald, Catherine J Hill, Paolo... [\[show\]](#)

---

**TWITTER DEMOGRAPHICS**    MENDELEY RE

---

The data shown below were collected from the profiles of **41** tweeters who shared this research output. [Click](#)



Cochrane Database of Systematic Reviews | [Review - Intervention](#)

## Telerehabilitation for chronic respiratory disease

✉ [Narelle S Cox](#), [Simone Dal Corso](#), [Henrik Hansen](#), [Christine F McDonald](#), [Catherine J Hill](#), [Paolo Zanaboni](#), [Jennifer A Alison](#), [Paul O'Halloran](#), [Heather Macdonald](#), [Anne E Holland](#)    [Authors' declarations of interest](#)

Version published: 29 January 2021    [Version history](#)

<https://doi.org/10.1002/14651858.CD013040.pub2> [↗](#)

[Download PDF](#)

[Cite this Review](#)

[Print](#)
[Comment](#)
[Share](#)
[Follow](#)

[Am score](#) 0    [Cited in 2 guidelines](#)

[Collapse all](#)    [Expand all](#)

### Contents

[28] Dale, Caramlau, Lindenmeyer and Williams (2008) Peer support telephone calls for improving health



**7**

**About this Attention Score**

In the top 25% of all research outputs scored by Altmetric

**Mentioned by**

- 2 policy sources
- 2 tweeters

**Citations**

- 109 Dimensions

**Readers on**

- 435 Mendeley

[MORE...](#)

**SUMMARY** | Policy documents | Twitter | Dimensions citations

**Title** Peer support telephone calls for improving health

**Published in** Cochrane database of systematic reviews, October 2008

**DOI** 10.1002/14651858.cd006903.pub2 [↗](#)

**PubMed ID** 18843736 [↗](#)

**Authors** Jeremy Dale, Isabela O Caramlau, Antje Lindenmeyer, Susan M Williams

**TWITTER DEMOGRAPHICS**

The data shown below were collected from the profiles of **2** tweeters who shared this re:



Cochrane Database of Systematic Reviews | [Review - Intervention](#)

## Peer support telephone calls for improving health

[✉](#) **Jeremy Dale, Isabela O Caramlau, Antje Lindenmeyer, Susan M Williams** Authors' declarations of interest

Version published: 08 October 2008 [Version history](#)

<https://doi.org/10.1002/14651858.CD006903.pub2> [↗](#)

**Abstract** [Collapse all](#) [Expand all](#)

**Unlock the full review** [➔](#)

[Download PDF](#)

[Cite this Review](#)

[Print](#) [Comment](#) [Share](#) [Follow](#)

[Alt score](#) 0 [Cited in 2 guidelines](#)

[29] Datta, Daruvala and Kumar (2020) Psychological interventions for psychosis in adolescents



**33**

**About this Attention Score**

In the top 5% of all research outputs scored by Altmetric

**Mentioned by** MORE...

- 1 news outlet
- 31 tweeters
- 2 Wikipedia pages

**Citations**

- 9 Dimensions

**Readers on**

- 262 Mendeley

**SUMMARY** News Twitter Wikipedia Dimensions citations

**Title** Psychological interventions for psychosis in adolescents

**Published in** Cochrane database of systematic reviews, July 2020

**DOI** 10.1002/14651858.cd009533.pub2

**Pubmed ID** 32633858

**Authors** Soumitra S Datta, Rhea Daruvala, Ajit Kumar

**TWITTER DEMOGRAPHICS**

The data shown below were collected from the profiles of 31 tweeters who shared this research



Cochrane Database of Systematic Reviews | [Review - Intervention](#)

## Psychological interventions for psychosis in adolescents

✉ [Soumitra S Datta](#), [Rhea Daruvala](#), [Ajit Kumar](#) Authors' declarations of interest

Version published: 03 July 2020 [Version history](#)

<https://doi.org/10.1002/14651858.CD009533.pub2>

Download PDF

Cite this Review

Print Comment Share Follow

Altmetric score 0

[Collapse all](#) [Expand all](#)

[30] de Jongh, Gurol-Urganci, Vodopivec-Jamsek, Car and Atun (2012) Mobile phone messaging for facilitating self-management of long-term illnesses



34

**?** About this Attention Score

In the top 5% of all research outputs scored by Altmetric

MORE...

**Mentioned by**

- 2 policy sources
- 40 tweeters
- 4 Facebook pages

**Citations**

- 568 Dimensions

**Readers on**

- 1469 Mendeley
- 2 CiteULike

**SUMMARY**
Policy documents
Twitter
Facebook
Dimensions citations

**Title** Mobile phone messaging for facilitating self-management of long-term illnesses

**Published in** Cochrane database of systematic reviews, December 2012

**DOI** [10.1002/14651858.cd007459.pub2](https://doi.org/10.1002/14651858.cd007459.pub2)

**Pubmed ID** [23235644](#)

**Authors** Thyra de Jongh, Ipek Gurol-Urganci, Vlasta Vodopivec-Jamsek, Josip Car, Rifat Atun

**Abstract** Long-term illnesses affect a significant proportion of the population in developed and developing... [\[show\]](#)

MENDELEY

TWITTER DEMOGRAPHICS

The data shown below were collected from the profiles of **40** tweeters who shared this research output. [\[show\]](#)



Cochrane Database of Systematic Reviews | [Review - Intervention](#)

## Mobile phone messaging for facilitating self-management of long-term illnesses

Thyra de Jongh, Ipek Gurol-Urganci, Vlasta Vodopivec-Jamsek, [✉ Josip Car](#), Rifat Atun Authors' declarations of interest

Version published: 12 December 2012 [Version history](#)

<https://doi.org/10.1002/14651858.CD007459.pub2>

Unlock the full review >

Download PDF ▾

↻ Cite this Review

Print
 Comment
 Share
 Follow

Alt score 0
 Cited in 7 guidelines

Collapse all Expand all

[31] Dennett, Janjua, Stovold, Harrison, McDonnell and Holland (2021) Tailored or adapted interventions for adults with chronic obstructive pulmonary disease and at least one other long-term condition: a mixed methods review



**7**

About this Attention Score

In the top 25% of all research outputs scored by Altmetric

Mentioned by

- 10 tweeters
- 2 Facebook pages

Citations

- 7 Dimensions

Readers on

- 321 Mendeley

**SUMMARY** | Twitter | Facebook | Dimensions citations

**Title** Tailored or adapted interventions for adults with chronic obstructive pulmonary disease and at least one other long-term condition: a mixed methods review

**Published in** Cochrane database of systematic reviews, July 2021

**DOI** 10.1002/14651858.cd013384.pub2

**Pubmed ID** 34309831

**Authors** Emma J Dennett, Sadia Janjua, Elizabeth Stovold, Samantha L Harrison, Melissa J McDonnell, Anne E... [show]

**TWITTER DEMOGRAPHICS** | MENDELEY READERS

The data shown below were collected from the profiles of 10 tweeters who shared this research output. [Click here to find out more about how the i](#)



Cochrane Database of Systematic Reviews | Review - Prototype

## Tailored or adapted interventions for adults with chronic obstructive pulmonary disease and at least one other long-term condition: a mixed methods review

✉ Emma J Dennett, Sadia Janjua, Elizabeth Stovold, Samantha L Harrison, Melissa J McDonnell, Anne E Holland  
Authors' declarations of interest

Download PDF

Cite this Review

Print Comment Share Follow

Altmetric score 0

[32] Devi, Singh, Powell, Fulton, Igbinedion and Rees (2015) Internet-based interventions for the secondary prevention of coronary heart disease



**9**

About this Attention Score

In the top 25% of all research outputs scored by Altmetric

Mentioned by

- 15 tweeters
- 2 Facebook pages

Citations

- 68 Dimensions

Readers on

- 480 Mendeley

**SUMMARY** | Twitter | Facebook | Dimensions citations

**Title** Internet-based interventions for the secondary prevention of coronary heart disease

**Published in** Cochrane database of systematic reviews, December 2015

**DOI** 10.1002/14651858.cd009386.pub2 [↗](#)

**Pubmed ID** 26691216 [↗](#)

**Authors** Reena Devi, Sally J Singh, John Powell, Emily A Fulton, Ewemade Igbinedion, Karen Rees

**Abstract** The Internet could provide a means of delivering secondary prevention programmes to people with... [\[show\]](#)

**TWITTER DEMOGRAPHICS** | MENDELEY READ

The data shown below were collected from the profiles of **15** tweeters who shared this research output. [Click here](#)



Cochrane Database of Systematic Reviews | [Review - Intervention](#)

## Internet-based interventions for the secondary prevention of coronary heart disease

Reena Devi, Sally J Singh, John Powell, Emily A Fulton, Ewemade Igbinedion, [✉ Karen Rees](#) Authors' declarations of interest

Version published: 22 December 2015 [Version history](#)

<https://doi.org/10.1002/14651858.CD009386.pub2> [↗](#)

[Download PDF](#)

[Cite this Review](#)

[Print](#) [Comment](#) [Share](#) [Follow](#)

[Alt score](#) 0



[33] Eccleston, Fisher, Craig, Duggan, Rosser and Keogh (2014) Psychological therapies (Internet-delivered) for the management of chronic pain in adults



**111**

About this Attention Score

In the top 5% of all research outputs scored by Altmetric

Mentioned by

- 6 news outlets
- 2 blogs
- 1 policy source
- 72 tweeters
- 1 Facebook page

Citations

- 240 Dimensions

Readers on

- 487 Mendeley

**SUMMARY** | News | Blogs | Policy documents | Twitter | Facebook | Dimensions citations

**Title** Psychological therapies (Internet-delivered) for the management of chronic pain in adults

**Published in** Cochrane database of systematic reviews, February 2014

**DOI** 10.1002/14651858.cd010152.pub2 [↗](#)

**Pubmed ID** 24574082 [↗](#)

**Authors** Christopher Eccleston, Emma Fisher, Lorraine Craig, Geoffrey B Duggan, Benjamin A Rosser, Edmund... [\[show\]](#)

**Abstract** Chronic pain (i.e. pain lasting longer than three months) is common. Psychological therapies (e.g... [\[show\]](#)

**TWITTER DEMOGRAPHICS**

The data shown below were collected from the profiles of 72 tweeters who shared this research output. [Click here to find out more](#)



**MENDELEY READERS**

Cochrane Database of Systematic Reviews | [Review - Intervention](#)

## Psychological therapies (Internet-delivered) for the management of chronic pain in adults

✉ Christopher Eccleston, Emma Fisher, Lorraine Craig, Geoffrey B Duggan, Benjamin A Rosser, Edmund Keogh  
 Authors' declarations of interest

Version published: 26 February 2014 [Version history](#)  
<https://doi.org/10.1002/14651858.CD010152.pub2> [↗](#)

[Download PDF](#)

[Cite this Review](#)

[Print](#)
[Comment](#)
[Share](#)
[Follow](#)

score 0
Cited in 4 guidelines

[34] Eccleston, Fisher, Thomas, Hearn, Derry, Stannard, Knaggs and Moore (2017) Interventions for the reduction of prescribed opioid use in chronic non-cancer pain

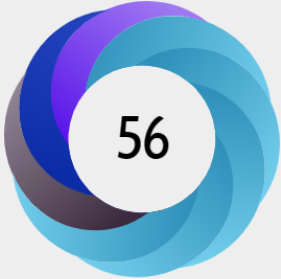

56

About this Attention Score

In the top 5% of all research outputs scored by Altmetric

Mentioned by

- 3 policy sources
- 71 tweeters
- 4 Facebook pages
- 2 Wikipedia pages

Citations

- 101 Dimensions

Readers on

- 371 Mendeley

SUMMARY

Policy documents

Twitter

Facebook

Wikipedia

Dimensions citations

**Title** Interventions for the reduction of prescribed opioid use in chronic non-cancer pain

**Published in** Cochrane database of systematic reviews, November 2017

**DOI** 10.1002/14651858.cd010323.pub3 [↗](#)

**Pubmed ID** 29130474 [↗](#)

**Authors** Christopher Eccleston, Emma Fisher, Kyla H Thomas, Leslie Hearn, Sheena Derry, Cathy Stannard... [\[show\]](#)

**Abstract** This is the first update of the original Cochrane Review published in 2013. The conclusions of... [\[show\]](#)

TWITTER DEMOGRAPHICS

MENDELEY READERS

The data shown below were collected from the profiles of 71 tweeters who shared this research output. [Click here to find out](#)



Cochrane Database of Systematic Reviews [Review - Intervention](#)

## Interventions for the reduction of prescribed opioid use in chronic non-cancer pain

✉ Christopher Eccleston, Emma Fisher, Kyla H Thomas, Leslie Hearn, Sheena Derry, Cathy Stannard, Roger Knaggs,

R Andrew Moore Authors' declarations of interest

Version published: 13 November 2017 [Version history](#)

<https://doi.org/10.1002/14651858.CD010323.pub3> [↗](#)

Download PDF

Cite this Review

Print Comment Share Follow

Altmetric score 0

Cited in 6 guidelines

### Contents

[35] Fiander, McGowan, Grad, Pluye, Hannes, Labrecque, Roberts, Salzwedel, Welch and Tugwell (2015) Interventions to increase the use of electronic health information by healthcare practitioners to improve clinical practice and patient outcomes



**36**

About this Attention Score

In the top 5% of all research outputs scored by Altmetric

Mentioned by

- 3 blogs
- 25 tweeters
- 1 Facebook page

Citations

- 41 Dimensions

Readers on

- 310 Mendeley
- 4 CiteULike

**SUMMARY** | Blogs | Twitter | Facebook | Dimensions citations

**Title** Interventions to increase the use of electronic health information by healthcare practitioners to improve clinical practice and patient outcomes

**Published in** Cochrane database of systematic reviews, March 2015

**DOI** 10.1002/14651858.cd004749.pub3

**Pubmed ID** 25770311

**Authors** Michelle Fiander, Jessie McGowan, Roland Grad, Pierre Pluye, Karin Hannes, Michel Labrecque, Nia W... [show]

**Abstract** There is a large volume of health information available, and, if applied in clinical practice, may... [show]

---

**TWITTER DEMOGRAPHICS** | MENDELEY READERS

The data shown below were collected from the profiles of **25** tweeters who shared this research output. [Click here to find out more about](#)



Cochrane Database of Systematic Reviews | Review - Intervention

## Interventions to increase the use of electronic health information by healthcare practitioners to improve clinical practice and patient outcomes

Michelle Fiander, Jessie McGowan, Roland Grad, Pierre Pluye, Karin Hannes, Michel Labrecque, Nia W Roberts, Douglas M Salzwedel, Vivian Welch, Peter Tugwell Authors' declarations of interest

Download PDF

Cite this Review

Print Comment Share Follow

Altmetric score 0

Cited in 1 guideline

[36] Fisher, Law, Dudeney, Eccleston and Palermo (2019) Psychological therapies (remotely delivered) for the management of chronic and recurrent pain in children and adolescents



**34**

About this Attention Score

In the top 5% of all research outputs scored by Altmetric

Mentioned by

- 1 news outlet
- 1 blog
- 1 policy source
- 21 tweeters
- 3 Wikipedia pages

Citations

- 95 Dimensions

Readers on

- 740 Mendeley

**SUMMARY** News Blogs Policy documents Twitter Wikipedia Dimensions citations

**Title** Psychological therapies (remotely delivered) for the management of chronic and recurrent pain in children and adolescents

**Published in** Cochrane database of systematic reviews, April 2019

**DOI** 10.1002/14651858.cd011118.pub3

**Pubmed ID** 30939227

**Authors** Emma Fisher, Emily Law, Joanne Dudeney, Christopher Eccleston, Tonya M Palermo

**TWITTER DEMOGRAPHICS** MENDELEY READERS

The data shown below were collected from the profiles of 21 tweeters who shared this research output. [Click here to find out more about](#)



Cochrane Database of Systematic Reviews | [Review - Intervention](#)

## Psychological therapies (remotely delivered) for the management of chronic and recurrent pain in children and adolescents

✉ Emma Fisher, Emily Law, Joanne Dudeney, Christopher Eccleston, Tonya M Palermo Authors' declarations of interest

Version published: 02 April 2019 [Version history](#)

<https://doi.org/10.1002/14651858.CD011118.pub3>

Download PDF

Cite this Review

Print Comment Share Follow

Altmetric score 0 Cited in 2 guidelines

[Collapse all](#) [Expand all](#)

Contents

[37] Fleming, Strydom, Katsaros, MacDonald, Curatolo, Fudalej and Pandis (2016) Non-pharmacological interventions for alleviating pain during orthodontic treatment



**47**

**About this Attention Score**

In the top 5% of all research outputs scored by Altmetric

**Mentioned by**

- 2 blogs
- 45 tweeters
- 2 Facebook pages
- 2 Wikipedia pages

**Citations**

- 42 Dimensions

**Readers on**

- 518 Mendeley

| SUMMARY             | Blogs                                                                                                                   | Twitter | Facebook | Wikipedia | Dimensions citations |
|---------------------|-------------------------------------------------------------------------------------------------------------------------|---------|----------|-----------|----------------------|
| <b>Title</b>        | Non-pharmacological interventions for alleviating pain during orthodontic treatment                                     |         |          |           |                      |
| <b>Published in</b> | Cochrane database of systematic reviews, December 2016                                                                  |         |          |           |                      |
| <b>DOI</b>          | 10.1002/14651858.cd010263.pub2 <a href="#">↗</a>                                                                        |         |          |           |                      |
| <b>Pubmed ID</b>    | 28009052 <a href="#">↗</a>                                                                                              |         |          |           |                      |
| <b>Authors</b>      | Padhraig S Fleming, Hardus Strydom, Christos Katsaros, LCI MacDonald, Michele Curatolo, Piotr... <a href="#">[show]</a> |         |          |           |                      |
| <b>Abstract</b>     | Pain is prevalent during orthodontics, particularly during the early stages of treatment. To... <a href="#">[show]</a>  |         |          |           |                      |

**TWITTER DEMOGRAPHICS**

---

The data shown below were collected from the profiles of **45** tweeters who shared this research output. [Click h](#)



**MENDELEY READI**

Cochrane Database of Systematic Reviews | [Review - Intervention](#)

## Non-pharmacological interventions for alleviating pain during orthodontic treatment

Padhraig S Fleming, Hardus Strydom, Christos Katsaros, LCI MacDonald, Michele Curatolo, [✉](#) Piotr Fudalej, Nikolaos Pandis  
 Authors' declarations of interest

Version published: 23 December 2016 [Version history](#)  
<https://doi.org/10.1002/14651858.CD010263.pub2> [↗](#)

[Download PDF](#)

[Cite this Review](#)

[Print](#)
[Comment](#)
[Share](#)
[Follow](#)

[Alt score](#) 0

[38] Flodgren, Rachas, Farmer, Inzitari and Shepperd (2015) Interactive telemedicine: effects on professional practice and health care outcomes



**139**

**About this Attention Score**

In the top 5% of all research outputs scored by Altmetric

**Mentioned by**

- 4 news outlets
- 3 blogs
- 4 policy sources
- 119 tweeters
- 3 Facebook pages
- 1 Google+ user

**Citations**

- 640 Dimensions

**Readers on**

- 1993 Mendeley
- 2 CiteULike

**SUMMARY** | News | Blogs | Policy documents | Twitter | Facebook

**Title** Interactive telemedicine: effects on professional practice and health care outcomes

**Published in** Cochrane database of systematic reviews, September 2015

**DOI** 10.1002/14651858.cd002098.pub2 [↗](#)

**Pubmed ID** 26343551 [↗](#)

**Authors** Gerd Flodgren, Antoine Rachas, Andrew J Farmer, Marco Inzitari, Sasha Shepperd

**Abstract** Telemedicine (TM) is the use of telecommunication systems to deliver health care at a distance. It... [\[show\]](#)

**TWITTER DEMOGRAPHICS** MENDELEY RE

The data shown below were collected from the profiles of **119** tweeters who shared this research output. [↗](#)



Cochrane Database of Systematic Reviews | [Review - Intervention](#)

## Interactive telemedicine: effects on professional practice and health care outcomes

Gerd Flodgren<sup>1</sup>, Antoine Rachas, Andrew J Farmer, Marco Inzitari, [✉](#) Sasha Shepperd Authors' declarations of interest

Version published: 07 September 2015 [Version history](#)

<https://doi.org/10.1002/14651858.CD002098.pub2> [↗](#)

[Download PDF](#)

[Cite this Review](#)

[Print](#) [Comment](#) [Share](#) [Follow](#)

[Alt score](#) 0 [Cited in 3 guidelines](#)

[39] Foster, Richards, Thorogood and Hillsdon (2013) Remote and web 2.0 interventions for promoting physical activity



**45**

**About this Attention Score**

In the top 5% of all research outputs scored by Altmetric

**Mentioned by**

- 1 blog
- 3 policy sources
- 49 tweeters

**Citations**

- 156 Dimensions

**Readers on**

- 306 Mendeley
- 1 CiteULike

| SUMMARY             | Blogs                                                                                                                     | Policy documents | Twitter | Dimensions citations |
|---------------------|---------------------------------------------------------------------------------------------------------------------------|------------------|---------|----------------------|
| <b>Title</b>        | Remote and web 2.0 interventions for promoting physical activity                                                          |                  |         |                      |
| <b>Published in</b> | Cochrane database of systematic reviews, September 2013                                                                   |                  |         |                      |
| <b>DOI</b>          | 10.1002/14651858.cd010395.pub2                                                                                            |                  |         |                      |
| <b>Pubmed ID</b>    | 24085594                                                                                                                  |                  |         |                      |
| <b>Authors</b>      | Foster, Charles, Richards, Justin, Thorogood, Margaret, Hillsdon, Melvyn                                                  |                  |         |                      |
| <b>Abstract</b>     | Remote and web 2.0 interventions for promoting physical activity (PA) are becoming increasingly... <a href="#">[show]</a> |                  |         |                      |

**TWITTER DEMOGRAPHICS** MENDEL

The data shown below were collected from the profiles of **49** tweeters who shared this research output



Cochrane Database of Systematic Reviews | [Review - Intervention](#)

## Remote and web 2.0 interventions for promoting physical activity

✉ Charles Foster, Justin Richards, Margaret Thorogood, Melvyn Hillsdon Authors' declarations of interest

Version published: 30 September 2013 [Version history](#)

<https://doi.org/10.1002/14651858.CD010395.pub2>

Download PDF

Cite this Review

Print Comment Share Follow

Altmetric score 0

Cited in 2 guidelines

[Collapse all](#) [Expand all](#)

[40] Galaal, Bryant, Deane, Al-Khaduri and Lopes (2011) Interventions for reducing anxiety in women undergoing colposcopy



**3**

? About this Attention Score

Average Attention Score compared to outputs of the same age

Mentioned by

- 2 Wikipedia pages

Citations

- 69 Dimensions

Readers on

- 283 Mendeley

MORE...

**SUMMARY**    Wikipedia    Dimensions citations

**Title** Interventions for reducing anxiety in women undergoing colposcopy

**Published in** Cochrane database of systematic reviews, December 2011

**DOI** 10.1002/14651858.cd006013.pub3 [↗](#)

**Pubmed ID** 22161395 [↗](#)

**Authors** Khadra Galaal, Andrew Bryant, Katherine HO Deane, Maha Al-Khaduri, Alberto D Lopes

**Abstract** Prior to the development of cervical cancer abnormal cervical cells can be detected on a cervical... [\[show\]](#)

**MENDELEY READERS**

? The data shown below were compiled from readership statistics for **283** Mendeley readers of this rese



Cochrane Database of Systematic Reviews | [Review - Intervention](#)

## Interventions for reducing anxiety in women undergoing colposcopy

✉ [Khadra Galaal](#), [Andrew Bryant](#), [Katherine HO Deane](#), [Maha Al-Khaduri](#), [Alberto D Lopes](#) [Authors' declarations of interest](#)

Version published: 07 December 2011 [Version history](#)

<https://doi.org/10.1002/14651858.CD006013.pub3> [↗](#)

[Collapse all](#) [Expand all](#)

### Abstract

**Unlock the full review** [>](#)

[Download PDF](#)

[Cite this Review](#)

[Print](#) [Comment](#) [Share](#) [Follow](#)

[Am scores](#) 0 [Cited in 1 guideline](#)



[41] Gates, Rutjes, Di Nisio, Karim, Chong, March, Martínez and Vernooij (2019) Computerised cognitive training for maintaining cognitive function in cognitively healthy people in midlife



**73**

About this Attention Score

In the top 5% of all research outputs scored by Altmetric

MORE...

Mentioned by

- 7 news outlets
- 1 blog
- 16 tweeters
- 2 Facebook pages

Citations

- 31 Dimensions

Readers on

- 477 Mendeley

**SUMMARY** News Blogs Twitter Facebook Dimensions citations

**Title** Computerised cognitive training for maintaining cognitive function in cognitively healthy people in midlife

**Published in** Cochrane database of systematic reviews, March 2019

**DOI** 10.1002/14651858.cd012278.pub2 [↗](#)

**Pubmed ID** 30864746 [↗](#)

**Authors** Nicola J Gates, Anne WS Rutjes, Marcello Di Nisio, Salman Karim, Lee-Yee Chong, Evrim March... [\[show\]](#)

**TWITTER DEMOGRAPHICS** MENDELEY REAL

The data shown below were collected from the profiles of **16** tweeters who shared this research output. [Click](#)



Cochrane Database of Systematic Reviews | [Review](#) - [Intervention](#)

## Computerised cognitive training for maintaining cognitive function in cognitively healthy people in midlife

✉ Nicola J Gates, Anne WS Rutjes, Marcello Di Nisio, Salman Karim, Lee-Yee Chong, Evrim March, Gabriel Martínez, Robin WM Vernooij [Authors' declarations of interest](#)

Version published: 13 March 2019 [Version history](#)

<https://doi.org/10.1002/14651858.CD012278.pub2> [↗](#)

Download PDF [↕](#)

[Cite this Review](#)

Print Comment Share Follow

Alt score 0

[42] Gates, Rutjes, Di Nisio, Karim, Chong, March, Martínez and Vernooij (2020) Computerised cognitive training for 12 or more weeks for maintaining cognitive function in cognitively healthy people in late life



**23**

**About this Attention Score**

In the top 25% of all research outputs scored by Altmetric

**Mentioned by**

- 1 news outlet
- 1 blog
- 3 tweeters
- 1 Wikipedia page

**Citations**

- 44 Dimensions

**Readers on**

- 423 Mendeley

**SUMMARY** | News | Blogs | Twitter | Wikipedia | Dimensions citations

---

**Title** Computerised cognitive training for 12 or more weeks for maintaining cognitive function in cognitively healthy people in late life

**Published in** Cochrane database of systematic reviews, February 2020

**DOI** 10.1002/14651858.cd012277.pub3 [↗](#)

**Pubmed ID** 32104914 [↗](#)

**Authors** Nicola J Gates, Anne WS Rutjes, Marcello Di Nisio, Salman Karim, Lee-Yee Chong, Evrim March... [\[show\]](#)

---

**TWITTER DEMOGRAPHICS** **MENDELEY READERS**

---

The data shown below were collected from the profiles of **3** tweeters who shared this research output. [Click here to find out](#)



Cochrane Database of Systematic Reviews | [Review - Intervention](#)

Conclusions changed

## Computerised cognitive training for 12 or more weeks for maintaining cognitive function in cognitively healthy people in late life

Nicola J Gates, Anne WS Rutjes, Marcello Di Nisio, Salman Karim, Lee-Yee Chong, Evrim March, Gabriel Martínez,

[✉ Robin WM Vernooij](#) Authors' declarations of interest

Version published: 27 February 2020 [Version history](#)

<https://doi.org/10.1002/14651858.CD012277.pub3> [↗](#)

Download PDF ▾

[↻ Cite this Review](#)

Print
 Comment
 Share
 Follow

**0** **Cited in 2 guidelines**

**Contents**

[43] Gates, Vernooij, Di Nisio, Karim, March, Martínez and Rutjes (2019) Computerised cognitive training for preventing dementia in people with mild cognitive impairment



**56**

About this Attention Score

In the top 5% of all research outputs scored by Altmetric

Mentioned by

- 1 news outlet
- 1 blog
- 63 tweeters
- 2 Facebook pages

Citations

- 89 Dimensions

Readers on

- 623 Mendeley

**SUMMARY** News Blogs Twitter Facebook Dimensions citations

**Title** Computerised cognitive training for preventing dementia in people with mild cognitive impairment

**Published in** Cochrane database of systematic reviews, March 2019

**DOI** 10.1002/14651858.cd012279.pub2

**Pubmed ID** 30864747

**Authors** Nicola J Gates, Robin WM Vernooij, Marcello Di Nisio, Salman Karim, Evrim March, Gabriel Martínez... [show]

**TWITTER DEMOGRAPHICS** MENDELEY READER

The data shown below were collected from the profiles of 63 tweeters who shared this research output. [Click](#)



Cochrane Database of Systematic Reviews | [Review - Intervention](#)

## Computerised cognitive training for preventing dementia in people with mild cognitive impairment

Nicola J Gates, Robin WM Vernooij, Marcello Di Nisio, Salman Karim, Evrim March, Gabriel Martínez, Anne WS Rutjes  
Authors' declarations of interest

Version published: 13 March 2019 [Version history](#)

<https://doi.org/10.1002/14651858.CD012279.pub2>

Download PDF

Cite this Review

Print Comment Share Follow

Altmetric scores 0 Cited in 1 guideline

[44] Gavine, Shinwell, Buchanan, Farre, Wade, Lynn, Marshall, Cumming, Dare and McFadden (2022)  
Support for healthy breastfeeding mothers with healthy term babies



**96**

**About this Attention Score**

In the top 5% of all research outputs scored by Altmetric

**Mentioned by**

- 1 news outlet
- 3 blogs
- 103 tweeters
- 2 Facebook pages
- 2 Wikipedia pages

**Citations**

- 6 Dimensions

**Readers on**

- 360 Mendeley

**SUMMARY** | News | Blogs | Twitter | Facebook | Wikipedia | Di

**Title** Support for healthy breastfeeding mothers with healthy term babies

**Published in** Cochrane database of systematic reviews, October 2022

**DOI** 10.1002/14651858.cd001141.pub6

**Pubmed ID** 36282618

**Authors** Anna Gavine, Shona C Shinwell, Phyll Buchanan, Albert Farre, Angela Wade, Fiona Lynn, Joyce... [show]

**TWITTER DEMOGRAPHICS** | MENDELEY

The data shown below were collected from the profiles of **103** tweeters who shared this research outp



Cochrane Database of Systematic Reviews | Review - Intervention

**Support for healthy breastfeeding mothers with healthy term babies**

Anna Gavine, Shona C Shinwell, Phyll Buchanan, Albert Farre, Angela Wade, Fiona Lynn, Joyce Marshall, Sara E Cumming, Shadrach Dare, Alison McFadden | Authors' declarations of interest

Version published: 25 October 2022 | Version history

<https://doi.org/10.1002/14651858.CD001141.pub6>

Unlock the full review

Download PDF

Cite this Review

Print | Comment | Share | Follow

Am score 0

Collapse all | Expand all

# [45] Gentry, van-Velthoven, Tudor Car and Car (2013) Telephone delivered interventions for reducing morbidity and mortality in people with HIV infection



**8**

**About this Attention Score**

In the top 25% of all research outputs scored by Altmetric

**Mentioned by** MORE...

- 1 policy source
- 8 tweeters
- 1 Facebook page

**Citations**

- 25 Dimensions

**Readers on**

- 577 Mendeley

**SUMMARY** | Policy documents | Twitter | Facebook | Dimensions citations

**Title** Telephone delivered interventions for reducing morbidity and mortality in people with HIV infection

**Published in** Cochrane database of systematic reviews, May 2013

**DOI** 10.1002/14651858.cd009189.pub2 [↗](#)

**Pubmed ID** 23728687 [↗](#)

**Authors** Sarah Gentry, Michelle HMMT van-Velthoven, Lorainne Tudor Car, Josip Car

**Abstract** This is one of three Cochrane reviews examining the role of the telephone in HIV/AIDS services... [\[show\]](#)

**TWITTER DEMOGRAPHICS** MENDELEY REA

The data shown below were collected from the profiles of **8** tweeters who shared this research output. [Click here for more details.](#)



Cochrane Database of Systematic Reviews | [Review - Intervention](#)

## Telephone delivered interventions for reducing morbidity and mortality in people with HIV infection

Sarah Gentry, Michelle HMMT van-Velthoven, Lorainne Tudor Car, [✉ Josip Car](#) Authors' declarations of interest

Version published: 31 May 2013 [Version history](#)

<https://doi.org/10.1002/14651858.CD009189.pub2> [↗](#)

[Download PDF](#)

[Cite this Review](#)

[Print](#) [Comment](#) [Share](#) [Follow](#)

[Alt score](#) 0

[46] Gillaizeau, Chan, Trinquart, Colombet, Walton, Rège-Walther, Burnand and Durieux (2013)  
 Computerized advice on drug dosage to improve prescribing practice

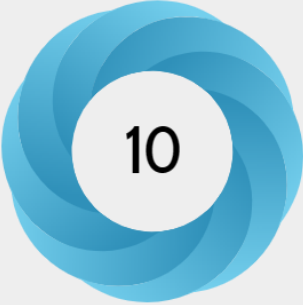

**10**

**About this Attention Score**

In the top 25% of all research outputs scored by Altmetric

**Mentioned by**  
15 tweeters

**Citations**  
93 Dimensions

**Readers on**  
567 Mendeley  
1 CiteULike

**SUMMARY** | Twitter | Dimensions citations

**Title** Computerized advice on drug dosage to improve prescribing practice

**Published in** Cochrane database of systematic reviews, November 2013

**DOI** 10.1002/14651858.cd002894.pub3

**Pubmed ID** 24218045

**Authors** Florence Gillaizeau, Ellis Chan, Ludovic Trinquart, Isabelle Colombet, RT Walton, Myriam Rège-Walthe... [show]

**Abstract** Maintaining therapeutic concentrations of drugs with a narrow therapeutic window is a complex task... [show]

**TWITTER DEMOGRAPHICS** | MENDELEY REAL

The data shown below were collected from the profiles of 15 tweeters who shared this research output. [Click](#)



Cochrane Database of Systematic Reviews | Review - Intervention

New search

## Computerized advice on drug dosage to improve prescribing practice

Florence Gillaizeau, Ellis Chan, Ludovic Trinquart, Isabelle Colombet, RT Walton, Myriam Rège-Walther, Bernard Burnand, [✉ Pierre Durieux](#) Authors' declarations of interest

Version published: 12 November 2013 | [Version history](#)

<https://doi.org/10.1002/14651858.CD002894.pub3>

Download PDF

Cite this Review

Print | Comment | Share | Follow

Alt score 0

Cited in 7 guidelines

[47] Gonçalves-Bradley, J Maria, Ricci-Cabello, Villanueva, Fønhus, Glenton, Lewin, Henschke, Buckley, Mehl and et al. (2020) Mobile technologies to support healthcare provider to healthcare provider communication and management of care



**36**

About this Attention Score

In the top 5% of all research outputs scored by Altmetric

Mentioned by

- 1 blog
- 53 tweeters
- 2 Facebook pages

Citations

- 62 Dimensions

Readers on

- 616 Mendeley

**SUMMARY** Blogs Twitter Facebook Dimensions citations

**Title** Mobile technologies to support healthcare provider to healthcare provider communication and management of care

**Published in** Cochrane database of systematic reviews, August 2020

**DOI** 10.1002/14651858.cd012927.pub2

**Pubmed ID** 32813281

**Authors** Daniela C Gonçalves-Bradley, Ana Rita J Maria, Ignacio Ricci-Cabello, Gemma Villanueva, Marita S Fønhus... [show]

**Abstract** The widespread use of mobile technologies can potentially expand the use of telemedicine... [show]

**TWITTER DEMOGRAPHICS** MENDELEY READER

The data shown below were collected from the profiles of 53 tweeters who shared this research output. [Click here](#)



Cochrane Database of Systematic Reviews | Review - Intervention

## Mobile technologies to support healthcare provider to healthcare provider communication and management of care

Daniela C Gonçalves-Bradley, Ana Rita J Maria, Ignacio Ricci-Cabello, Gemma Villanueva, Marita S Fønhus, Claire Glenton, Simon Lewin, Nicholas Henschke, Brian S Buckley, Garrett L Mehl, Tigest Tamrat, Sasha Shepperd

Authors' declarations of interest

Version published: 18 August 2020 Version history

Download PDF

Cite this Review

Print Comment Share Follow

Alt scores 0

[48] González-Fraile, Ballesteros, Rueda, Santos-Zorrozúa, Solà and McCleery (2021) Remotely delivered information, training and support for informal caregivers of people with dementia



27

About this Attention Score

In the top 25% of all research outputs scored by Altmetric

Mentioned by

- 1 news outlet
- 32 tweeters
- 2 Facebook pages
- 4 Wikipedia pages

Citations

- 24 Dimensions

Readers on

- 489 Mendeley

SUMMARY

News Twitter Facebook Wikipedia Dimensions citations

**Title** Remotely delivered information, training and support for informal caregivers of people with dementia

**Published in** Cochrane database of systematic reviews, January 2021

**DOI** 10.1002/14651858.cd006440.pub3

**Pubmed ID** 33417236

**Authors** Eduardo González-Fraile, Javier Ballesteros, José-Ramón Rueda, Borja Santos-Zorrozúa, Ivan Solà... [show]

TWITTER DEMOGRAPHICS

MENDELEY READERS

The data shown below were collected from the profiles of 32 tweeters who shared this research output. [Click here to find](#)



Cochrane Database of Systematic Reviews | [Review - Intervention](#)

## Remotely delivered information, training and support for informal caregivers of people with dementia

✉ Eduardo González-Fraile, Javier Ballesteros, José-Ramón Rueda, Borja Santos-Zorrozúa, Ivan Solà, Jenny McCleery  
Authors' declarations of interest

Version published: 04 January 2021 [Version history](#)  
<https://doi.org/10.1002/14651858.CD006440.pub3>

Download PDF

Cite this Review

Print Comment Share Follow

Alt score 0

### Contents



[49] Gordon, Sinopoulou, Lakunina, Gjuladin-Hellon, Bracewell and Akobeng (2023) Remote care through telehealth for people with inflammatory bowel disease



**3**

About this Attention Score

Above-average Attention Score compared to outputs of the same age (58th percentile)

Mentioned by

4 tweeters

**SUMMARY** Twitter

**Title** Remote care through telehealth for people with inflammatory bowel disease

**Published in** Cochrane database of systematic reviews, May 2023

**DOI** 10.1002/14651858.cd014821.pub2 [↗](#)

**Authors** Morris Gordon, Vassiliki Sinopoulou, Svetlana Lakunina, Teuta Gjuladin-Hellon, Kelly Bracewell... [\[show\]](#)

**TWITTER DEMOGRAPHICS**

The data shown below were collected from the profiles of 4 tweeters who shared this research output. [Click](#)



Cochrane Database of Systematic Reviews | [Review](#) - [Intervention](#)

## Remote care through telehealth for people with inflammatory bowel disease

✉ [Morris Gordon](#), [Vassiliki Sinopoulou](#), [Svetlana Lakunina](#), [Teuta Gjuladin-Hellon](#), [Kelly Bracewell](#), [Anthony K Akobeng](#)  
Authors' declarations of interest

Version published: 04 May 2023 [Version history](#)

<https://doi.org/10.1002/14651858.CD014821.pub2> [↗](#)

Download PDF [↕](#)

Cite this Review

Print Comment Share Follow

Am scores 0

[50] Goyder, Atherton, Car, Heneghan and Car (2015) Email for clinical communication between healthcare professionals



14

**About this Attention Score**

In the top 25% of all research outputs scored by Altmetric

MORE...

**Mentioned by**

- 20 tweeters
- 1 Facebook page
- 1 Google+ user

**Citations**

- 34 Dimensions

**Readers on**

- 296 Mendeley

**SUMMARY**
Twitter
Facebook
Google+
Dimensions citations

|                     |                                                                    |
|---------------------|--------------------------------------------------------------------|
| <b>Title</b>        | Email for clinical communication between healthcare professionals  |
| <b>Published in</b> | Cochrane database of systematic reviews, February 2015             |
| <b>DOI</b>          | 10.1002/14651858.cd007979.pub3 <a href="#">↗</a>                   |
| <b>Pubmed ID</b>    | 25698124 <a href="#">↗</a>                                         |
| <b>Authors</b>      | Clare Goyder, Helen Atherton, Mate Car, Carl J Heneghan, Josip Car |

**TWITTER DEMOGRAPHICS** MEN

---

The data shown below were collected from the profiles of **20** tweeters who shared this research o



Cochrane Database of Systematic Reviews | [Review - Intervention](#)

## Email for clinical communication between healthcare professionals

✉ [Clare Goyder](#), [Helen Atherton](#), [Mate Car](#), [Carl J Heneghan](#), [Josip Car](#) Authors' declarations of interest

Version published: 20 February 2015 [Version history](#)

<https://doi.org/10.1002/14651858.CD007979.pub3> [↗](#)

Download PDF ▾

[↻](#) Cite this Review

Print

Comment

Share

Follow

score
0

[Collapse all](#) [Expand all](#)

[51] Gurol-Urganci, de Jongh, Vodopivec-Jamsek, Atun and Car (2013) Mobile phone messaging reminders for attendance at healthcare appointments



26

About this Attention Score

In the top 25% of all research outputs scored by Altmetric

Mentioned by

- 1 blog
- 2 policy sources
- 18 tweeters
- 2 Facebook pages

Citations

- 365 Dimensions

Readers on

- 792 Mendeley

SUMMARY

**Title** Mobile phone messaging reminders for attendance at healthcare appointments

**Published in** Cochrane database of systematic reviews, December 2013

**DOI** 10.1002/14651858.cd007458.pub3

**Pubmed ID** 24310741

**Authors** Ipek Gurol-Urganci, Thyra de Jongh, Vlasta Vodopivec-Jamsek, Rifat Atun, Josip Car

**Abstract** This review is an update of the original Cochrane review published in July 2012. Missed... [show]

TWITTER DEMOGRAPHICS

MENDELEY READERS

The data shown below were collected from the profiles of 18 tweeters who shared this research output. [Click here to find out more](#)



Cochrane Database of Systematic Reviews | [Review - Intervention](#)

[New search](#)

## Mobile phone messaging reminders for attendance at healthcare appointments

Ipek Gurol-Urganci, Thyra de Jongh, Vlasta Vodopivec-Jamsek, Rifat Atun, [✉ Josip Car](#) [Authors' declarations of interest](#)

Version published: 05 December 2013 [Version history](#)

<https://doi.org/10.1002/14651858.CD007458.pub3>

Download PDF

Cite this Review

Print Comment Share Follow

Am score 0 Cited in 1 guideline

[52] Gurol-Urganci, de Jongh, Vodopivec-Jamsek, Car and Atun (2012) Mobile phone messaging for communicating results of medical investigations



**3**

About this Attention Score

Average Attention Score compared to outputs of the same age

Mentioned by

- 4 tweeters

Citations

- 69 Dimensions

Readers on

- 388 Mendeley

**SUMMARY** | Twitter | Dimensions citations

**Title** Mobile phone messaging for communicating results of medical investigations

**Published in** Cochrane database of systematic reviews, June 2012

**DOI** 10.1002/14651858.cd007456.pub2

**Pubmed ID** 22696369

**Authors** Ipek Gurol-Urganci, Thyra de Jongh, Vlasta Vodopivec-Jamsek, Josip Car, Rifat Atun

**Abstract** Mobile phone messaging, such as Short Message Service (SMS) and Multimedia Message Service (MMS)... [show]

**TWITTER DEMOGRAPHICS** | MENDELEY READER!

The data shown below were collected from the profiles of 4 tweeters who shared this research output. [Click here!](#)



Cochrane Database of Systematic Reviews | [Review - Intervention](#)

## Mobile phone messaging for communicating results of medical investigations

Ipek Gurol-Urganci, Thyra de Jongh, Vlasta Vodopivec-Jamsek, [✉ Josip Car, Rifat Atun](#) Authors' declarations of interest

Version published: 13 June 2012 [Version history](#)

<https://doi.org/10.1002/14651858.CD007456.pub2>

**Unlock the full review** >

Download PDF

Cite this Review

Print Comment Share Follow

 **score** 0

[Collapse all](#) [Expand all](#)

# [53] Gurusamy, Vaughan and Davidson (2014) Formal education of patients about to undergo laparoscopic cholecystectomy



**4**

? About this Attention Score

Good Attention Score compared to outputs of the same age (68th percentile)

Mentioned by

- 1 policy source
- 1 tweeter

Citations

- 24 Dimensions

Readers on

- 193 Mendeley

**SUMMARY** | Policy documents | Twitter | Dimensions citations

**Title** Formal education of patients about to undergo laparoscopic cholecystectomy

**Published in** Cochrane database of systematic reviews, February 2014

**DOI** 10.1002/14651858.cd009933.pub2 [↗](#)

**Pubmed ID** 24585482 [↗](#)

**Authors** Kurinchi Selvan Gurusamy, Jessica Vaughan, Brian R Davidson

**Abstract** Generally, before being operated on, patients will be given informal information by the healthcare... [\[show\]](#)

**TWITTER DEMOGRAPHICS** | MENDELEY REAC

The data shown below were collected from the profile of 1 tweeter who shared this research output. [Click here](#)



Cochrane Database of Systematic Reviews | Review - Intervention

## Formal education of patients about to undergo laparoscopic cholecystectomy

✉ Kurinchi Selvan Gurusamy, Jessica Vaughan, Brian R Davidson | Authors' declarations of interest

Version published: 28 February 2014 | [Version history](#)

<https://doi.org/10.1002/14651858.CD009933.pub2> [↗](#)

Download PDF [↕](#)

Cite this Review

Print | Comment | Share | Follow

Am score 0 | Cited in 2 guidelines

[54] Handford, Tynan, Rackal and Glazier (2006) Setting and organization of care for persons living with HIV/AIDS



Citations

54 Dimensions

Readers on

247 Mendeley

**SUMMARY**    Dimensions citations

|                     |                                                                                                                          |
|---------------------|--------------------------------------------------------------------------------------------------------------------------|
| <b>Title</b>        | Setting and organization of care for persons living with HIV/AIDS                                                        |
| <b>Published in</b> | Cochrane database of systematic reviews, July 2006                                                                       |
| <b>DOI</b>          | 10.1002/14651858.cd004348.pub2 <a href="#">↗</a>                                                                         |
| <b>Pubmed ID</b>    | 16856042 <a href="#">↗</a>                                                                                               |
| <b>Authors</b>      | Curtis Handford, Anne-Marie Tynan, Julia M Rackal, Richard Glazier                                                       |
| <b>Abstract</b>     | Treating the world's 40.3 million persons currently infected with HIV/AIDS is an international... <a href="#">[show]</a> |

**ME**

---

 The data shown below were compiled from readership statistics for **247** Mendeley readers of this



Cochrane Database of Systematic Reviews [Review - Intervention](#)

## Setting and organization of care for persons living with HIV/AIDS

Curtis Handford, [Anne-Marie Tynan](#), Julia M Rackal, [✉ Richard Glazier](#) Authors' declarations of interest

Version published: 19 July 2006 [Version history](#)

<https://doi.org/10.1002/14651858.CD004348.pub2> [↗](#)

[Collapse all](#) [Expand all](#)

### Abstract

Unlock the full review [>](#)

 Download PDF [▾](#)

[↻](#) Cite this Review

   

 score 0

[55] Horvath, Azman, Kennedy and Rutherford (2012) Mobile phone text messaging for promoting adherence to antiretroviral therapy in patients with HIV infection



**45**

**About this Attention Score**

In the top 5% of all research outputs scored by Altmetric

**Mentioned by** MORE...

- 1 news outlet
- 3 policy sources
- 36 tweeters
- 2 Facebook pages

**Citations**

- 405 Dimensions

**Readers on**

- 767 Mendeley
- 1 CiteULike

**SUMMARY** | News | Policy documents | Twitter | Facebook | Dimensions citations

**Title** Mobile phone text messaging for promoting adherence to antiretroviral therapy in patients with HIV infection

**Published in** Cochrane database of systematic reviews, March 2012

**DOI** 10.1002/14651858.cd009756 [↗](#)

**Pubmed ID** 22419345 [↗](#)

**Authors** Tara Horvath, Hana Azman, Gail E Kennedy, George W Rutherford

**Abstract** More than 34 million people are presently living with HIV infection. Antiretroviral therapy (ART)... [\[show\]](#)

---

**TWITTER DEMOGRAPHICS** MENDELEY READERS

The data shown below were collected from the profiles of **36** tweeters who shared this research output. [Click here to find](#)



Cochrane Database of Systematic Reviews | [Review - Intervention](#)

## Mobile phone text messaging for promoting adherence to antiretroviral therapy in patients with HIV infection

✉ [Tara Horvath](#), [Hana Azman](#), [Gail E Kennedy](#), [George W Rutherford](#) Authors' declarations of interest

Version published: 14 March 2012 [Version history](#)

<https://doi.org/10.1002/14651858.CD009756> [↗](#)

**Unlock the full review** [▶](#)

Download PDF ▼

[↻](#) Cite this Review

Print
 Comment
 Share
 Follow

[Collapse all](#) [Expand all](#)

scores 0 Cited in 1 guideline

[56] Inglis, Clark, Dierckx, Prieto-Merino and Cleland (2015) Structured telephone support or non-invasive telemonitoring for patients with heart failure



**137**

**About this Attention Score**

In the top 5% of all research outputs scored by Altmetric

**Mentioned by**

- 13 news outlets
- 2 policy sources
- 38 tweeters
- 3 Facebook pages
- 3 Wikipedia pages
- 1 Google+ user

**Citations**

- 318 Dimensions

**Readers on**

- 579 Mendeley

**SUMMARY** | News | Policy documents | Twitter | Facebook | Wikipedia | Google

**Title** Structured telephone support or non-invasive telemonitoring for patients with heart failure

**Published in** Cochrane database of systematic reviews, October 2015

**DOI** 10.1002/14651858.cd007228.pub3 [↗](#)

**Pubmed ID** 26517969 [↗](#)

**Authors** Sally C Inglis, Robyn A Clark, Riet Dierckx, David Prieto-Merino, John GF Cleland

**Abstract** Specialised disease management programmes for heart failure aim to improve care, clinical outcomes... [\[show\]](#)

---

**TWITTER DEMOGRAPHICS** MENDELEY READERS

The data shown below were collected from the profiles of **38** tweeters who shared this research output. [Click here to](#)



1  8

Cochrane Database of Systematic Reviews | [Review - Intervention](#)

[New search](#) [Conclusions changed](#)

## Structured telephone support or non-invasive telemonitoring for patients with heart failure

[✉](#) Sally C Inglis, Robyn A Clark, Riet Dierckx, David Prieto-Merino, John GF Cleland Authors' declarations of interest

Version published: 31 October 2015 [Version history](#)

<https://doi.org/10.1002/14651858.CD007228.pub3> [↗](#)

[Download PDF](#)

[Cite this Review](#)

[Print](#)
[Comment](#)
[Share](#)
[Follow](#)


[Cited in 12 guidelines](#)



[57] Jacobson Vann, Jacobson, Coyne-Beasley, Asafu-Adjei and Szilagyi (2018) Patient reminder and recall interventions to improve immunization rates



**553**

**About this Attention Score**

In the top 5% of all research outputs scored by Altmetric

**Mentioned by**

- 62 news outlets
- 6 blogs
- 2 policy sources
- 37 tweeters
- 3 Facebook pages

**Citations**

- 247 Dimensions

**Readers on**

- 551 Mendeley

| SUMMARY             | News                                                                                                                       | Blogs | Policy documents | Twitter | Facebook | Dir |
|---------------------|----------------------------------------------------------------------------------------------------------------------------|-------|------------------|---------|----------|-----|
| <b>Title</b>        | Patient reminder and recall interventions to improve immunization rates                                                    |       |                  |         |          |     |
| <b>Published in</b> | Cochrane database of systematic reviews, January 2018                                                                      |       |                  |         |          |     |
| <b>DOI</b>          | 10.1002/14651858.cd003941.pub3 <a href="#">↗</a>                                                                           |       |                  |         |          |     |
| <b>Pubmed ID</b>    | 29342498 <a href="#">↗</a>                                                                                                 |       |                  |         |          |     |
| <b>Authors</b>      | Julie C Jacobson Vann, Robert M Jacobson, Tamera Coyne-Beasley, Josephine K Asafu-Adjei, Peter G... <a href="#">[show]</a> |       |                  |         |          |     |
| <b>Abstract</b>     | Immunization rates for children and adults are rising, but coverage levels have not reached... <a href="#">[show]</a>      |       |                  |         |          |     |

**TWITTER DEMOGRAPHICS**

---

The data shown below were collected from the profiles of **37** tweeters who shared this research output. [Click t](#)



**MENDELEY READ**

Cochrane Database of Systematic Reviews | [Review - Intervention](#)

[New search](#)

## Patient reminder and recall interventions to improve immunization rates

✉ [Julie C Jacobson Vann](#), [Robert M Jacobson](#), [Tamera Coyne-Beasley](#), [Josephine K Asafu-Adjei](#), [Peter G Szilagyi](#)

Authors' declarations of interest

Version published: 18 January 2018 [Version history](#)

<https://doi.org/10.1002/14651858.CD003941.pub3> [↗](#)

[Download PDF](#)

[Cite this Review](#)

[Print](#)
[Comment](#)
[Share](#)
[Follow](#)

score 0 [Cited in 1 guideline](#)

**Contents**

[58] Janjua, Banchoff, Threapleton, Prigmore, Fletcher and Disler (2021) Digital interventions for the management of chronic obstructive pulmonary disease



**29**

**About this Attention Score**

In the top 25% of all research outputs scored by Altmetric

**Mentioned by**

- 1 policy source
- 45 tweeters
- 4 Facebook pages

**Citations**

- 22 Dimensions

**Readers on**

- 257 Mendeley

**SUMMARY** | Policy documents | Twitter | Facebook | Dimensions citations

**Title** Digital interventions for the management of chronic obstructive pulmonary disease

**Published in** Cochrane database of systematic reviews, April 2021

**DOI** 10.1002/14651858.cd013246.pub2 [↗](#)

**Pubmed ID** 33871065 [↗](#)

**Authors** Sadia Janjua, Emma Banchoff, Christopher JD Threapleton, Samantha Prigmore, Joshua Fletcher... [\[show\]](#)

**TWITTER DEMOGRAPHICS** | MENDELEY R

The data shown below were collected from the profiles of **45** tweeters who shared this research output. [↗](#)



Cochrane Database of Systematic Reviews | [Review - Intervention](#)

## Digital interventions for the management of chronic obstructive pulmonary disease

✉ Sadia Janjua, Emma Banchoff, Christopher JD Threapleton, Samantha Prigmore, Joshua Fletcher, Rebecca T Disler  
Authors' declarations of interest

Version published: 19 April 2021 | [Version history](#)

<https://doi.org/10.1002/14651858.CD013246.pub2> [↗](#)

Download PDF [↕](#)

Cite this Review [↗](#)

Print | Comment | Share | Follow

Alt score 0

[59] Janjua, Carter, Threapleton, Prigmore and Disler (2021) Telehealth interventions: remote monitoring and consultations for people with chronic obstructive pulmonary disease (COPD)



**12**

About this Attention Score

In the top 25% of all research outputs scored by Altmetric

MORE...

Mentioned by

- 21 tweeters
- 1 Facebook page

Citations

- 23 Dimensions

Readers on

- 218 Mendeley

**SUMMARY** | Twitter | Facebook | Dimensions citations

**Title** Telehealth interventions: remote monitoring and consultations for people with chronic obstructive pulmonary disease (COPD)

**Published in** Cochrane database of systematic reviews, July 2021

**DOI** 10.1002/14651858.cd013196.pub2 [↗](#)

**Pubmed ID** 34693988 [↗](#)

**Authors** Sadia Janjua, Deborah Carter, Christopher JD Threapleton, Samantha Prigmore, Rebecca T Disler

**TWITTER DEMOGRAPHICS** | MENDELEY READERS

The data shown below were collected from the profiles of **21** tweeters who shared this research output. [Click here to find o](#)



Cochrane Database of Systematic Reviews | [Review - Intervention](#)

## Telehealth interventions: remote monitoring and consultations for people with chronic obstructive pulmonary disease (COPD)

✉ Sadia Janjua, Deborah Carter, Christopher JD Threapleton, Samantha Prigmore, Rebecca T Disler  
Authors' declarations of interest

Version published: 20 July 2021 [Version history](#)  
<https://doi.org/10.1002/14651858.CD013196.pub2> [↗](#)

Download PDF [↕](#)

[↻](#) Cite this Review

[🖨](#) Print | [💬](#) Comment | [🔗](#) Share | [+](#) Follow

 score 0

[60] Jawad, Jawad and Alwan (2019) Interventions using social networking sites to promote contraception in women of reproductive age



**13**

About this Attention Score

In the top 25% of all research outputs scored by Altmetric

Mentioned by **22** tweeters

Citations **19** Dimensions

Readers on **223** Mendeley

**SUMMARY** | Twitter | Dimensions citations

**Title** Interventions using social networking sites to promote contraception in women of reproductive age

**Published in** Cochrane database of systematic reviews, March 2019

**DOI** 10.1002/14651858.cd012521.pub2

**PubMed ID** 30818414

**Authors** Aalaa Jawad, Issrah Jawad, Nisreen A Alwan

**TWITTER DEMOGRAPHICS** | MENDI

The data shown below were collected from the profiles of **22** tweeters who shared this research out



Cochrane Database of Systematic Reviews | [Review - Intervention](#)

## Interventions using social networking sites to promote contraception in women of reproductive age

[✉ Aalaa Jawad, Issrah Jawad, Nisreen A Alwan](#) [Authors' declarations of interest](#)

Version published: 01 March 2019 [Version history](#)

<https://doi.org/10.1002/14651858.CD012521.pub2>

Download PDF

Cite this Review

Print Comment Share Follow

Altmetric score 0

[61] Kaner, Beyer, Garnett, Crane, Brown, Muirhead, Redmore, O'Donnell, Newham, de Vocht and et al. (2017) Personalised digital interventions for reducing hazardous and harmful alcohol consumption in community-dwelling populations



142

[? About this Attention Score](#)

In the top 5% of all research outputs scored by Altmetric

MORE...

**Mentioned by**

- 7 news outlets
- 1 blog
- 4 policy sources
- 107 tweeters
- 10 Facebook pages

**Citations**

- 216 Dimensions

**Readers on**

- 646 Mendeley

**SUMMARY**    News    Blogs    Policy documents    Twitter    Facebook    Dimensions citations

---

**Title**    Personalised digital interventions for reducing hazardous and harmful alcohol consumption in community-dwelling populations

**Published in**    Cochrane database of systematic reviews, September 2017

**DOI**    10.1002/14651858.cd011479.pub2 [↗](#)

**Pubmed ID**    28944453 [↗](#)

**Authors**    Eileen FS Kaner, Fiona R Beyer, Claire Garnett, David Crane, Jamie Brown, Colin Muirhead, James... [\[show\]](#)

**Abstract**    Excessive alcohol use contributes significantly to physical and psychological illness, injury and... [\[show\]](#)

---

**TWITTER DEMOGRAPHICS**

---

The data shown below were collected from the profiles of **107** tweeters who shared this research output. [Click here to find out more](#)



**MENDELEY READERS**

Cochrane Database of Systematic Reviews | [Review - Intervention](#)

## Personalised digital interventions for reducing hazardous and harmful alcohol consumption in community-dwelling populations

Eileen FS Kaner, [✉](#) Fiona R Beyer, Claire Garnett, David Crane, Jamie Brown, Colin Muirhead, James Redmore, Amy O'Donnell, James J Newham, Frank de Vocht, Matthew Hickman, Heather Brown, Gregory Maniatopoulos, Susan Michie [Authors' declarations of interest](#)

Version published: 25 September 2017 [Version history](#)  
<https://doi.org/10.1002/14651858.CD011479.pub2> [↗](#)

[Download PDF](#)

[Cite this Review](#)

[Print](#)
[Comment](#)
[Share](#)
[Follow](#)

0
Cited in 2 guidelines

**Contents**

[62] Kauppi, Välimäki, Hätönen, Kuosmanen, Warwick-Smith and Adams (2014) Information and communication technology based prompting for treatment compliance for people with serious mental illness



4

About this Attention Score

Good Attention Score compared to outputs of the same age (69th percentile)

Mentioned by

6 tweeters

Citations

26 Dimensions

Readers on

370 Mendeley

**SUMMARY** | Twitter | Dimensions citations

**Title** Information and communication technology based prompting for treatment compliance for people with serious mental illness

**Published in** Cochrane database of systematic reviews, June 2014

**DOI** 10.1002/14651858.cd009960.pub2 [↗](#)

**Pubmed ID** 24934254 [↗](#)

**Authors** Kaisa Kauppi, Maritta Välimäki, Heli M Hätönen, Lauri M Kuosmanen, Katja Warwick-Smith, Clive E... [\[show\]](#)

**TWITTER DEMOGRAPHICS** | MENDELEY READERS

The data shown below were collected from the profiles of 6 tweeters who shared this research output. [Click here to find out more](#)



Cochrane Database of Systematic Reviews | [Review - Intervention](#)

## Information and communication technology based prompting for treatment compliance for people with serious mental illness

✉ Kaisa Kauppi, Maritta Välimäki, Heli M Hätönen, Lauri M Kuosmanen, Katja Warwick-Smith, Clive E Adams  
Authors' declarations of interest

Version published: 17 June 2014 [Version history](#)

<https://doi.org/10.1002/14651858.CD009960.pub2> [↗](#)

Download PDF [↕](#)

Cite this Review

Print | Comment | Share | Follow

Am score 0 [↗](#) Cited in 1 guideline

Contents

[63] Kew and Cates (2016) Home telemonitoring and remote feedback between clinic visits for asthma



**19**

**About this Attention Score**

In the top 25% of all research outputs scored by Altmetric

**Mentioned by**

- 32 tweeters
- 2 Facebook pages

**Citations**

- 52 Dimensions

**Readers on**

- 550 Mendeley

**SUMMARY** | [Twitter](#) | [Facebook](#) | [Dimensions citations](#)

**Title** Home telemonitoring and remote feedback between clinic visits for asthma

**Published in** Cochrane database of systematic reviews, August 2016

**DOI** [10.1002/14651858.cd011714.pub2](https://doi.org/10.1002/14651858.cd011714.pub2)

**Pubmed ID** [27486836](#)

**Authors** Kayleigh M Kew, Christopher J Cates

**Abstract** Asthma is a chronic disease that causes reversible narrowing of the airways due to... [\[show\]](#)

**TWITTER DEMOGRAPHICS**

The data shown below were collected from the profiles of **32** tweeters who shared this rese



Cochrane Database of Systematic Reviews | [Review - Intervention](#)

## Home telemonitoring and remote feedback between clinic visits for asthma

[✉ Kayleigh M Kew, Christopher J Cates](#) Authors' declarations of interest

Version published: 03 August 2016 [Version history](#)

<https://doi.org/10.1002/14651858.CD011714.pub2>

[Download PDF](#)

[Cite this Review](#)

[Print](#) [Comment](#) [Share](#) [Follow](#)

[Alt score](#) 0 [Cited in 2 guidelines](#)

## [64] Kew and Cates (2016) Remote versus face-to-face check-ups for asthma



**41**

[? About this Attention Score](#)

In the top 5% of all research outputs scored by Altmetric

**Mentioned by** [MORE...](#)

- 1 blog
- 2 policy sources
- 46 tweeters
- 4 Facebook pages

**Citations**

- 40 Dimensions

**Readers on**

- 352 Mendeley

**SUMMARY** | Blogs | Policy documents | Twitter | Facebook | Dimensions citations

**Title** Remote versus face-to-face check-ups for asthma

**Published in** Cochrane database of systematic reviews, April 2016

**DOI** 10.1002/14651858.cd0111715.pub2 [↗](#)

**Pubmed ID** 27087257 [↗](#)

**Authors** Kayleigh M Kew, Christopher J Cates

**Abstract** Asthma remains a significant cause of avoidable morbidity and mortality. Regular check-ups with a... [\[show\]](#)

**TWITTER DEMOGRAPHICS** MENDELEY READERS

The data shown below were collected from the profiles of **46** tweeters who shared this research output. [Click](#)



Cochrane Database of Systematic Reviews | [Review - Intervention](#)

### Remote versus face-to-face check-ups for asthma

✉ [Kayleigh M Kew, Christopher J Cates](#) [Authors' declarations of interest](#)

Version published: 18 April 2016 [Version history](#)

<https://doi.org/10.1002/14651858.CD0111715.pub2> [↗](#)

[Download PDF](#)

[Cite this Review](#)

[Print](#) [Comment](#) [Share](#) [Follow](#)

[Altmetric score](#) 0 [Cited in 3 guidelines](#)

[Collapse all](#) [Expand all](#)



[65] Khan, Amatya, Kesselring and Galea (2015) Telerehabilitation for persons with multiple sclerosis



**11**

[About this Attention Score](#)

In the top 25% of all research outputs scored by Altmetric

[MORE...](#)

**Mentioned by**

- 13 tweeters
- 1 Wikipedia page

**Citations**

- 88 Dimensions

**Readers on**

- 713 Mendeley

**SUMMARY**    Twitter    Wikipedia    Dimensions citations

---

**Title**    Telerehabilitation for persons with multiple sclerosis

**Published in**    Cochrane database of systematic reviews, April 2015

**DOI**    10.1002/14651858.cd010508.pub2 [↗](#)

**Pubmed ID**    25854331 [↗](#)

**Authors**    Fary Khan, Bhasker Amatya, Jurg Kesselring, Mary Galea

**Abstract**    Telerehabilitation, an emerging method, extends rehabilitative care beyond the hospital, and... [\[show\]](#)

---

**TWITTER DEMOGRAPHICS** MENDELEY REA

---

The data shown below were collected from the profiles of **13** tweeters who shared this research output. [Click](#)



Cochrane Database of Systematic Reviews [Review - Intervention](#)

## Telerehabilitation for persons with multiple sclerosis

[✉ Fary Khan, Bhasker Amatya, Jurg Kesselring, Mary Galea](#)    Authors' declarations of interest

Version published: 09 April 2015    [Version history](#)

<https://doi.org/10.1002/14651858.CD010508.pub2> [↗](#)

[Download PDF](#)

[Cite this Review](#)

[Print](#)    [Comment](#)    [Share](#)    [Follow](#)

    **Cited in 1 guideline**

[Collapse all](#)    [Expand all](#)

[66] Kobayashi, Hanada, Matsuzaki, Takehara, Ota, Sasaki, Nagata and Mori (2017) Assessment and support during early labour for improving birth outcomes



**6**

**About this Attention Score**

Good Attention Score compared to outputs of the same age (70th percentile)

**Mentioned by** MORE...

- 4 tweeters
- 2 Wikipedia pages

**Citations**

- 41 Dimensions

**Readers on**

- 461 Mendeley

**SUMMARY**
Twitter
Wikipedia
Dimensions citations

**Title** Assessment and support during early labour for improving birth outcomes

**Published in** Cochrane database of systematic reviews, April 2017

**DOI** 10.1002/14651858.cd011516.pub2 [↗](#)

**Pubmed ID** 28426160 [↗](#)

**Authors** Shinobu Kobayashi, Nobutsugu Hanada, Masayo Matsuzaki, Kenji Takehara, Erika Ota, Hatoko Sasaki... [\[show\]](#)

**Abstract** The progress of labour in the early or latent phase is usually slow and may include painful... [\[show\]](#)

**TWITTER DEMOGRAPHICS**
MENDELEY R

---

The data shown below were collected from the profiles of 4 tweeters who shared this research output. [Click](#)



Cochrane Database of Systematic Reviews | [Review - Intervention](#)

## Assessment and support during early labour for improving birth outcomes

Shinobu Kobayashi, Nobutsugu Hanada, Masayo Matsuzaki, Kenji Takehara, Erika Ota, Hatoko Sasaki, Chie Nagata, [✉ Rintaro Mori](#) Authors' declarations of interest

Version published: 20 April 2017 [Version history](#)

<https://doi.org/10.1002/14651858.CD011516.pub2> [↗](#)

[Download PDF](#)

[Cite this Review](#)

[Print](#)
[Comment](#)
[Share](#)
[Follow](#)

Alt score
0
[Cited in 4 guidelines](#)

[67] Kuster, Dalsbø, Luong Thanh, Agarwal, Durand-Moreau and Kirkehei (2017) Computer-based versus in-person interventions for preventing and reducing stress in workers



22

About this Attention Score

In the top 25% of all research outputs scored by Altmetric

Mentioned by

- 34 tweeters
- 2 Facebook pages

Citations

- 17 Dimensions

Readers on

- 386 Mendeley

SUMMARY   Twitter   Facebook   Dimensions citations

**Title** Computer-based versus in-person interventions for preventing and reducing stress in workers

**Published in** Cochrane database of systematic reviews, August 2017

**DOI** 10.1002/14651858.cd011899.pub2

**Pubmed ID** 28853146

**Authors** Anootnara Talkul Kuster, Therese K Dalsbø, Bao Yen Luong Thanh, Arnav Agarwal, Quentin V Durand-Moreau... [show]

**Abstract** Chronic exposure to stress has been linked to several negative physiological and psychological... [show]

TWITTER DEMOGRAPHICS

MENDELEY READE

The data shown below were collected from the profiles of 34 tweeters who shared this research output. [Click here](#)



Cochrane Database of Systematic Reviews | Review - Intervention

## Computer-based versus in-person interventions for preventing and reducing stress in workers

✉ Anootnara Talkul Kuster, Therese K Dalsbø, Bao Yen Luong Thanh, Arnav Agarwal, Quentin V Durand-Moreau, Ingvild Kirkehei Authors' declarations of interest

Version published: 30 August 2017 [Version history](#)

<https://doi.org/10.1002/14651858.CD011899.pub2>

Download PDF

Cite this Review

Print   Comment   Share   Follow

Altmetric score 0

### Contents

# [68] Lavender, Richens, Milan, Smyth and Dowswell (2013) Telephone support for women during pregnancy and the first six weeks postpartum



**20**

About this Attention Score

In the top 25% of all research outputs scored by Altmetric

Mentioned by

- 2 blogs
- 11 tweeters
- 1 Google+ user

Citations

- 78 Dimensions

Readers on

- 734 Mendeley

**SUMMARY** | Blogs | Twitter | Google+ | Dimensions citations

**Title** Telephone support for women during pregnancy and the first six weeks postpartum

**Published in** Cochrane database of systematic reviews, July 2013

**DOI** 10.1002/14651858.cd009338.pub2 [↗](#)

**Pubmed ID** 23881662 [↗](#)

**Authors** Tina Lavender, Yana Richens, Stephen J Milan, Rebecca MD Smyth, Therese Dowswell

**Abstract** Telephone communication is increasingly being accepted as a useful form of support within health... [\[show\]](#)

**TWITTER DEMOGRAPHICS** | MENDELEY READERS

The data shown below were collected from the profiles of **11** tweeters who shared this research output. [Click here to](#)



Cochrane Database of Systematic Reviews | [Review - Intervention](#)

## Telephone support for women during pregnancy and the first six weeks postpartum

✉ [Tina Lavender, Yana Richens, Stephen J Milan, Rebecca MD Smyth, Therese Dowswell](#) Authors' declarations of interest

Version published: 18 July 2013 [Version history](#)

<https://doi.org/10.1002/14651858.CD009338.pub2> [↗](#)

Download PDF [↕](#)

Cite this Review

Print | Comment | Share | Follow

Altmetric scores 0 [Cited in 4 guidelines](#)

[69] Laver, Adey-Wakeling, Crotty, Lannin, George and Sherrington (2020) Telerehabilitation services for stroke



**66**

**About this Attention Score**

In the top 5% of all research outputs scored by Altmetric

**Mentioned by**

- 84 tweeters
- 2 Facebook pages
- 1 Wikipedia page

**Citations**

- 233 Dimensions

**Readers on**

- 1153 Mendeley

**SUMMARY** | [Twitter](#) | [Facebook](#) | [Wikipedia](#) | [Dimensions citations](#)

**Title** Telerehabilitation services for stroke

**Published in** Cochrane database of systematic reviews, January 2020

**DOI** 10.1002/14651858.cd010255.pub3 [↗](#)

**Pubmed ID** 32002991 [↗](#)

**Authors** Kate E Laver, Zoe Adey-Wakeling, Maria Crotty, Natasha A Lannin, Stacey George, Catherine... [\[show\]](#)

**TWITTER DEMOGRAPHICS** | **MENDELEY**

The data shown below were collected from the profiles of **84** tweeters who shared this research output. [↗](#)



Cochrane Database of Systematic Reviews | [Review - Intervention](#)

## Telerehabilitation services for stroke

[✉](#) **Kate E Laver, Zoe Adey-Wakeling, Maria Crotty, Natasha A Lannin, Stacey George, Catherine Sherrington**

Authors' declarations of interest

Version published: 31 January 2020 [Version history](#)

<https://doi.org/10.1002/14651858.CD010255.pub3> [↗](#)

[New search](#)

[Download PDF](#)

[Cite this Review](#)

[Print](#) [Comment](#) [Share](#) [Follow](#)

[Alt score](#) 0 [Cited in 2 guidelines](#)

[70] Laver, Lange, George, Deutsch, Saposnik and Crotty (2017) Virtual reality for stroke rehabilitation



**150**

**About this Attention Score**

In the top 5% of all research outputs scored by Altmetric

**Mentioned by**

- 4 news outlets
- 1 blog
- 1 policy source
- 145 tweeters
- 1 patent
- 9 Facebook pages
- 4 Wikipedia pages
- 2 Google+ users

**Citations**

- 724 Dimensions

**Readers on**

- 1700 Mendeley

**SUMMARY**

News

Blogs

Policy documents

Twitter

Patents

Facebook

**Title** Virtual reality for stroke rehabilitation

**Published in** Cochrane database of systematic reviews, November 2017

**DOI** 10.1002/14651858.cd008349.pub4 [↗](#)

**Pubmed ID** 29156493 [↗](#)

**Authors** Kate E Laver, Belinda Lange, Stacey George, Judith E Deutsch, Gustavo Saposnik, Maria Crotty

**Abstract** Virtual reality and interactive video gaming have emerged as recent treatment approaches in stroke... [\[show\]](#)

**TWITTER DEMOGRAPHICS**

The data shown below were collected from the profiles of **145** tweeters who shared this research output. [Click here to](#)



1  30

**Geographical breakdown**

**MENDELEY READERS**

**Demographic breakdown**

Cochrane Database of Systematic Reviews | [Review - Intervention](#)

## Virtual reality for stroke rehabilitation

✉ [Kate E Laver](#), [Belinda Lange](#), [Stacey George](#), [Judith E Deutsch](#), [Gustavo Saposnik](#), [Maria Crotty](#)  
 Authors' declarations of interest

Version published: 20 November 2017 [Version history](#)  
<https://doi.org/10.1002/14651858.CD008349.pub4> [↗](#)

Download PDF ▾

[↻](#) Cite this Review

Print

Comment

Share

Follow

0

**Cited in 8 guidelines**

[71] Leon, Balakrishna, Hohlfeld, Odendaal, Schmidt, Zweigenthal, Anstey Watkins and Daniels (2020) Routine Health Information System (RHIS) improvements for strengthened health system management



**17**

**About this Attention Score**

In the top 25% of all research outputs scored by Altmetric

**Mentioned by**  
30 tweeters

**Citations**  
19 Dimensions

**Readers on**  
364 Mendeley

**SUMMARY** | Twitter | Dimensions citations

**Title** Routine Health Information System (RHIS) improvements for strengthened health system management

**Published in** Cochrane database of systematic reviews, August 2020

**DOI** 10.1002/14651858.cd012012.pub2

**Pubmed ID** 32803893

**Authors** Natalie Leon, Yusenantha Balakrishna, Ameer Hohlfeld, Willem A Odendaal, Bey-Marrié Schmidt... [show]

**Abstract** A well-functioning routine health information system (RHIS) can provide the information needed for... [show]

**TWITTER DEMOGRAPHICS**

The data shown below were collected from the profiles of 30 tweeters who shared this research output. [Click here to view](#)



**MENDELEY READERS**

Cochrane Database of Systematic Reviews | Review - Intervention

## Routine Health Information System (RHIS) improvements for strengthened health system management

✉ Natalie Leon, Yusenantha Balakrishna, Ameer Hohlfeld, Willem A Odendaal, Bey-Marrié Schmidt, Virginia Zweigenthal, Jocelyn Anstey Watkins, Karen Daniels Authors' declarations of interest

Version published: 13 August 2020 [Version history](#)

<https://doi.org/10.1002/14651858.CD012012.pub2>

Download PDF

Cite this Review

Print Comment Share Follow

Altmetric score 0

[72] Linden, Hawley, Blackwood, Evans, Anderson and O'Rourke (2016) Technological aids for the rehabilitation of memory and executive functioning in children and adolescents with acquired brain injury



**17**

**About this Attention Score**

In the top 25% of all research outputs scored by Altmetric

**Mentioned by**

- 1 blog
- 11 tweeters
- 3 Facebook pages

**Citations**

- 30 Dimensions

**Readers on**

- 650 Mendeley

**SUMMARY** | Blogs | Twitter | Facebook | Dimensions citations

**Title** Technological aids for the rehabilitation of memory and executive functioning in children and adolescents with acquired brain injury

**Published in** Cochrane database of systematic reviews, July 2016

**DOI** 10.1002/14651858.cd011020.pub2

**Pubmed ID** 27364851

**Authors** Mark Linden, Carol Hawley, Bronagh Blackwood, Jonathan Evans, Vicki Anderson, Conall O'Rourke

**Abstract** The use of technology in healthcare settings is on the increase and may represent a cost-effective... [show]

**TWITTER DEMOGRAPHICS** | MENDELEY READERS

The data shown below were collected from the profiles of 11 tweeters who shared this research output. [Click here to find out more](#)



Cochrane Database of Systematic Reviews | [Review - Intervention](#)

## Technological aids for the rehabilitation of memory and executive functioning in children and adolescents with acquired brain injury

✉ [Mark Linden, Carol Hawley, Bronagh Blackwood, Jonathan Evans, Vicki Anderson, Conall O'Rourke](#)  
Authors' declarations of interest

Version published: 01 July 2016 [Version history](#)

<https://doi.org/10.1002/14651858.CD011020.pub2>

Download PDF

Cite this Review

Print Comment Share Follow

Altmetric score 0

Cited in 2 guidelines

Contents



[73] Lins, Hayder-Beichel, Rücker, Motschall, Antes, Meyer and Langer (2014) Efficacy and experiences of telephone counselling for informal carers of people with dementia



**33**

**About this Attention Score**

In the top 5% of all research outputs scored by Altmetric

**Mentioned by**

- 1 blog
- 2 policy sources
- 25 tweeters
- 1 Wikipedia page

**Citations**

- 65 Dimensions

**Readers on**

- 560 Mendeley

**SUMMARY**    Blogs    Policy documents    Twitter    Wikipedia    Dimensions citations

---

**Title** Efficacy and experiences of telephone counselling for informal carers of people with dementia

**Published in** Cochrane database of systematic reviews, September 2014

**DOI** 10.1002/14651858.cd009126.pub2 [↗](#)

**Pubmed ID** 25177838 [↗](#)

**Authors** Sabine Lins, Daniela Hayder-Beichel, Gerta Rücker, Edith Motschall, Gerd Antes, Gabriele Meyer... [\[show\]](#)

**Abstract** Informal carers of people with dementia can suffer from depressive symptoms, emotional distress... [\[show\]](#)

---

**TWITTER DEMOGRAPHICS** MENDELEY READERS

---

The data shown below were collected from the profiles of **25** tweeters who shared this research output. [Click here to f](#)



Cochrane Database of Systematic Reviews | [Review - Intervention](#)

## Efficacy and experiences of telephone counselling for informal carers of people with dementia

✉ Sabine Lins, Daniela Hayder-Beichel, Gerta Rücker, Edith Motschall, Gerd Antes, Gabriele Meyer, Gero Langer  
Authors' declarations of interest

Version published: 01 September 2014 [Version history](#)  
<https://doi.org/10.1002/14651858.CD009126.pub2> [↗](#)

[Download PDF](#)

[Cite this Review](#)

[Print](#)
[Comment](#)
[Share](#)
[Follow](#)

 0
[Cited in 2 guidelines](#)

**Contents**

[74] Lopez, Stockton, Chen, Steiner and Gallo (2014) Behavioral interventions for improving dual-method contraceptive use



Mentioned by  
**2** tweeters

Citations  
**25** Dimensions

Readers on  
**347** Mendeley

**SUMMARY**    Twitter    Dimensions citations

**Title** Behavioral interventions for improving dual-method contraceptive use

**Published in** Cochrane database of systematic reviews, March 2014

**DOI** 10.1002/14651858.cd010915.pub2 [↗](#)

**Pubmed ID** 24683022 [↗](#)

**Authors** Laureen M Lopez, Laurie L Stockton, Mario Chen, Markus J Steiner, Maria F Gallo, Lopez LM... [\[show\]](#)

**Abstract** Dual-method contraception refers to using condoms as well as another modern method of contraception... [\[show\]](#)

**TWITTER DEMOGRAPHICS**    MENDELEY READERS

The data shown below were collected from the profiles of **2** tweeters who shared this research output. [Click here to find out](#)



Cochrane Database of Systematic Reviews | [Review - Intervention](#)

## Behavioral interventions for improving dual-method contraceptive use

✉ [Laureen M Lopez](#), [Laurie L Stockton](#), [Mario Chen](#), [Markus J Steiner](#), [Maria F Gallo](#) [Authors' declarations of interest](#)

Version published: 30 March 2014 [Version history](#)

<https://doi.org/10.1002/14651858.CD010915.pub2> [↗](#)

Download PDF [↕](#)

[↻](#) Cite this Review

[Print](#) [Comment](#) [Share](#) [Follow](#)

 score  [Cited in 1 guideline](#)

[75] Lynch, Jones, Simpson, Fini, Kuys, Borschmann, Kramer, Johnson, Callisaya, Mahendran and et al. (2018) Activity monitors for increasing physical activity in adult stroke survivors



**77**

**About this Attention Score**

In the top 5% of all research outputs scored by Altmetric

**Mentioned by**

- 1 blog
- 107 tweeters
- 2 Facebook pages

**Citations**

- 49 Dimensions

**Readers on**

- 566 Mendeley

**SUMMARY** | Blogs | Twitter | Facebook | Dimensions citations

---

**Title** Activity monitors for increasing physical activity in adult stroke survivors

**Published in** Cochrane database of systematic reviews, July 2018

**DOI** 10.1002/14651858.cd012543.pub2 [↗](#)

**Pubmed ID** 30051462 [↗](#)

**Authors** Elizabeth A Lynch, Taryn M Jones, Dawn B Simpson, Natalie A Fini, Suzanne S Kuys, Karen Borschmann... [\[show\]](#)

**Abstract** Stroke is the third leading cause of disability worldwide. Physical activity is important for... [\[show\]](#)

---

**TWITTER DEMOGRAPHICS** MENDELEY READERS

The data shown below were collected from the profiles of **107** tweeters who shared this research output. [Click here!](#)



Cochrane Database of Systematic Reviews | [Review - Intervention](#)

## Activity monitors for increasing physical activity in adult stroke survivors

✉ Elizabeth A Lynch, Taryn M Jones, Dawn B Simpson, Natalie A Fini, Suzanne S Kuys, Karen Borschmann, Sharon Kramer, Liam Johnson, Michele L Callisaya, Niruthikha Mahendran, Heidi Janssen, Coralie English, Authors' declarations of interest on behalf of the ACTIONs Collaboration

Version published: 27 July 2018 [Version history](#)

[Download PDF](#)

[Cite this Review](#)

[Print](#)
[Comment](#)
[Share](#)
[Follow](#)


score 0
**Cited in 1 guideline**

[76] Malaguti, Dal Corso, Janjua and Holland (2021) Supervised maintenance programmes following pulmonary rehabilitation compared to usual care for chronic obstructive pulmonary disease



**27**

About this Attention Score

In the top 25% of all research outputs scored by Altmetric

Mentioned by

- 47 tweeters
- 1 Facebook page

Citations

- 24 Dimensions

Readers on

- 176 Mendeley

**SUMMARY** | Twitter | Facebook | Dimensions citations

**Title** Supervised maintenance programmes following pulmonary rehabilitation compared to usual care for chronic obstructive pulmonary disease

**Published in** Cochrane database of systematic reviews, August 2021

**DOI** 10.1002/14651858.cd013569.pub2 [↗](#)

**Pubmed ID** 34404111 [↗](#)

**Authors** Carla Malaguti, Simone Dal Corso, Sadia Janjua, Anne E Holland

**TWITTER DEMOGRAPHICS** | MENDELEY READERS

The data shown below were collected from the profiles of **47** tweeters who shared this research output. [Click here to find out more about](#)



Cochrane Database of Systematic Reviews | [Review - Intervention](#)

## Supervised maintenance programmes following pulmonary rehabilitation compared to usual care for chronic obstructive pulmonary disease

Carla Malaguti, Simone Dal Corso, Sadia Janjua, [✉ Anne E Holland](#) Authors' declarations of interest

Version published: 17 August 2021 [Version history](#)

[Download PDF](#)

[Cite this Review](#)

[Print](#) [Comment](#) [Share](#) [Follow](#)

[Am scores](#) 0 [Cited in 1 guideline](#)

[77] Manyande, Cyna, Yip, Chooi and Middleton (2015) Non-pharmacological interventions for assisting the induction of anaesthesia in children



**11**

**About this Attention Score**

In the top 25% of all research outputs scored by Altmetric

**Mentioned by**

- 11 tweeters
- 3 Facebook pages
- 6 Wikipedia pages
- 1 video uploader

**Citations**

- 163 Dimensions

**Readers on**

- 576 Mendeley

| SUMMARY             | Twitter                                                                                                                     | Facebook | Wikipedia | Video | Dimensions citations |
|---------------------|-----------------------------------------------------------------------------------------------------------------------------|----------|-----------|-------|----------------------|
| <b>Title</b>        | Non-pharmacological interventions for assisting the induction of anaesthesia in children                                    |          |           |       |                      |
| <b>Published in</b> | Cochrane database of systematic reviews, July 2015                                                                          |          |           |       |                      |
| <b>DOI</b>          | 10.1002/14651858.cd006447.pub3 <a href="#">↗</a>                                                                            |          |           |       |                      |
| <b>Pubmed ID</b>    | 26171895 <a href="#">↗</a>                                                                                                  |          |           |       |                      |
| <b>Authors</b>      | Anne Manyande, Allan M Cyna, Peggy Yip, Cheryl Chooi, Philippa Middleton                                                    |          |           |       |                      |
| <b>Abstract</b>     | Induction of general anaesthesia can be distressing for children. Non-pharmacological methods for... <a href="#">[show]</a> |          |           |       |                      |

**TWITTER DEMOGRAPHICS**

---

The data shown below were collected from the profiles of **11** tweeters who shared this research output. [Click here](#)



**MENDELEY READERS**

Cochrane Database of Systematic Reviews | [Review - Intervention](#)

[New search](#)

## Non-pharmacological interventions for assisting the induction of anaesthesia in children

Anne Manyande, [✉](#) Allan M Cyna, Peggy Yip, Cheryl Chooi, Philippa Middleton Authors' declarations of interest

Version published: 14 July 2015 [Version history](#)

<https://doi.org/10.1002/14651858.CD006447.pub3> [↗](#)

[Download PDF](#)

[Cite this Review](#)

[Print](#)
[Comment](#)
[Share](#)
[Follow](#)

0
[Cited in 1 guideline](#)



[79] Marcano Belisario, Jamsek, Huckvale, O'Donoghue, Morrison and Car (2015) Comparison of self-administered survey questionnaire responses collected using mobile apps versus other methods



18

About this Attention Score

In the top 25% of all research outputs scored by Altmetric

Mentioned by

- 1 policy source
- 20 tweeters
- 2 Facebook pages

Citations

- 165 Dimensions

Readers on

- 538 Mendeley

SUMMARY

Policy documents

Twitter

Facebook

Dimensions citations

**Title** Comparison of self-administered survey questionnaire responses collected using mobile apps versus other methods

**Published in** Cochrane database of systematic reviews, July 2015

**DOI** 10.1002/14651858.mr000042.pub2 [↗](#)

**Pubmed ID** 26212714 [↗](#)

**Authors** José S Marcano Belisario, Jan Jamsek, Kit Huckvale, John O'Donoghue, Cecily P Morrison, Josip Car

**Abstract** Self-administered survey questionnaires are an important data collection tool in clinical practice... [\[show\]](#)

TWITTER DEMOGRAPHICS

MENDELEY READERS

The data shown below were collected from the profiles of 20 tweeters who shared this research output. [Click here to](#)



Cochrane Database of Systematic Reviews | [Review - Methodology](#)

## Comparison of self-administered survey questionnaire responses collected using mobile apps versus other methods

✉ José S Marcano Belisario, Jan Jamsek, Kit Huckvale, John O'Donoghue, Cecily P Morrison, Josip Car  
Authors' declarations of interest

Version published: 27 July 2015 [Version history](#)

<https://doi.org/10.1002/14651858.MR000042.pub2> [↗](#)

Download PDF

Cite this Review

Print Comment Share Follow

Altmetric score 0

[80] Martin, Kelly, Kernohan, McCreight and Nugent (2008) Smart home technologies for health and social care support

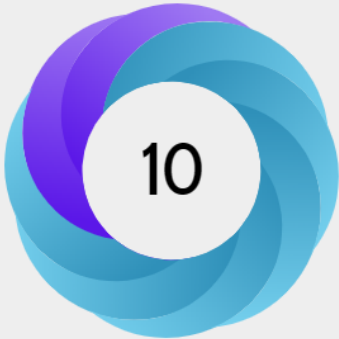

**10**

About this Attention Score

In the top 25% of all research outputs scored by Altmetric

Mentioned by

- 2 policy sources
- 5 tweeters

Citations

- 154 Dimensions

Readers on

- 466 Mendeley
- 3 CiteULike

**SUMMARY** | Policy documents | Twitter | Dimensions citations

**Title** Smart home technologies for health and social care support

**Published in** Cochrane database of systematic reviews, October 2008

**DOI** 10.1002/14651858.cd006412.pub2

**PubMed ID** 18843715

**Authors** Suzanne Martin, Greg Kelly, W George Kernohan, Bernadette McCreight, Christopher Nugent

**TWITTER DEMOGRAPHICS**

The data shown below were collected from the profiles of 5 tweeters who shared this research



Cochrane Database of Systematic Reviews | Review - Intervention

### Smart home technologies for health and social care support

[✉ Suzanne Martin](#), Greg Kelly, W George Kernohan, Bernadette McCreight, Christopher Nugent Authors' declarations of interest

Version published: 08 October 2008 [Version history](#)

<https://doi.org/10.1002/14651858.CD006412.pub2>

#### Abstract

**Unlock the full review** >

Download PDF

Cite this Review

Print Comment Share Follow

Am scores 0 Cited in 1 guideline

Collapse all Expand all



[81] Matkin, Ordóñez-Mena and Hartmann-Boyce (2019) Telephone counselling for smoking cessation



**103**

**About this Attention Score**

In the top 5% of all research outputs scored by Altmetric

**Mentioned by** MORE...

- 5 news outlets
- 4 blogs
- 1 policy source
- 53 tweeters
- 8 Facebook pages
- 1 Wikipedia page

**Citations**

- 149 Dimensions

**Readers on**

- 482 Mendeley

**SUMMARY** | News | Blogs | Policy documents | Twitter

**Title** Telephone counselling for smoking cessation

**Published in** Cochrane database of systematic reviews, May 2019

**DOI** 10.1002/14651858.cd002850.pub4

**Pubmed ID** 31045250

**Authors** William Matkin, José M. Ordóñez-Mena, Jamie Hartmann-Boyce

**TWITTER DEMOGRAPHICS**

The data shown below were collected from the profiles of 53 tweeters who shared this



1 10

Cochrane Database of Systematic Reviews | Review - Intervention

## Telephone counselling for smoking cessation

William Matkin<sup>a</sup>, José M. Ordóñez-Mena<sup>a</sup>, Jamie Hartmann-Boyce <sup>a</sup> Authors' declarations of interest

Version published: 02 May 2019 [Version history](#)

<https://doi.org/10.1002/14651858.CD002850.pub4>

New search

Download PDF

Cite this Review

Print Comment Share Follow

Altmetric score 0

Cited in 4 guidelines

Collapse all Expand all

[82] Mayo-Wilson and Montgomery (2013) Media-delivered cognitive behavioural therapy and behavioural therapy (self-help) for anxiety disorders in adults



**20**

**About this Attention Score**

In the top 25% of all research outputs scored by Altmetric

**Mentioned by**

- 26 tweeters
- 2 Wikipedia pages

**Citations**

- 108 Dimensions

**Readers on**

- 722 Mendeley
- 1 CiteULike

**SUMMARY** | [Twitter](#) | [Wikipedia](#) | [Dimensions citations](#)

---

**Title** Media-delivered cognitive behavioural therapy and behavioural therapy (self-help) for anxiety disorders in adults

**Published in** Cochrane database of systematic reviews, September 2013

**DOI** 10.1002/14651858.cd005330.pub4 [↗](#)

**Pubmed ID** 24018460 [↗](#)

**Authors** Evan Mayo-Wilson, Paul Montgomery

**Abstract** Anxiety disorders are the most common mental health problems. They are chronic and unremitting... [\[show\]](#)

---

**TWITTER DEMOGRAPHICS** MENDELEY READI

---

The data shown below were collected from the profiles of **26** tweeters who shared this research output. [Click h](#)



Cochrane Database of Systematic Reviews | [Review](#) - [Intervention](#)

## Media-delivered cognitive behavioural therapy and behavioural therapy (self-help) for anxiety disorders in adults

[✉ Evan Mayo-Wilson, Paul Montgomery](#) Authors' declarations of interest

Version published: 09 September 2013 [Version history](#)

<https://doi.org/10.1002/14651858.CD005330.pub4> [↗](#)

[Download PDF](#)

[Cite this Review](#)

[Print](#)
[Comment](#)
[Share](#)
[Follow](#)

 0
 **Cited in 4 guidelines**

[83] McCabe, McCann and Brady (2017) Computer and mobile technology interventions for self-management in chronic obstructive pulmonary disease



**37**

About this Attention Score

In the top 5% of all research outputs scored by Altmetric

Mentioned by

- 2 news outlets
- 2 policy sources
- 25 tweeters
- 2 Facebook pages

Citations

- 156 Dimensions

Readers on

- 718 Mendeley

**SUMMARY** | News | Policy documents | Twitter | Facebook | Dimensions citations

**Title** Computer and mobile technology interventions for self-management in chronic obstructive pulmonary disease

**Published in** Cochrane database of systematic reviews, May 2017

**DOI** 10.1002/14651858.cd011425.pub2 [↗](#)

**Pubmed ID** 28535331 [↗](#)

**Authors** Catherine McCabe, Margaret McCann, Anne Marie Brady

**Abstract** Chronic obstructive pulmonary disease (COPD) is characterised by airflow obstruction due to an... [\[show\]](#)

**TWITTER DEMOGRAPHICS** | MENDELEY READERS

The data shown below were collected from the profiles of **25** tweeters who shared this research output. [Click here](#)



Cochrane Database of Systematic Reviews | Review - Intervention

## Computer and mobile technology interventions for self-management in chronic obstructive pulmonary disease

✉ Catherine McCabe, Margaret McCann, Anne Marie Brady Authors' declarations of interest

Version published: 23 May 2017 [Version history](#)

<https://doi.org/10.1002/14651858.CD011425.pub2> [↗](#)

Download PDF [↕](#)

Cite this Review

Print | Comment | Share | Follow

Alt score 0 [↗](#) Cited in 6 guidelines

[84] McCleery, Laverty and Quinn (2021) Diagnostic test accuracy of telehealth assessment for dementia and mild cognitive impairment



**35**

About this Attention Score

In the top 5% of all research outputs scored by Altmetric

Mentioned by

- 2 news outlets
- 37 tweeters
- 1 Facebook page

Citations

- 9 Dimensions

Readers on

- 204 Mendeley

**SUMMARY** News Twitter Facebook Dimensions citations

**Title** Diagnostic test accuracy of telehealth assessment for dementia and mild cognitive impairment

**Published in** Cochrane database of systematic reviews, July 2021

**DOI** 10.1002/14651858.cd013786.pub2

**Pubmed ID** 34282852

**Authors** Jenny McCleery, Julian Laverty, Terry J Quinn

**TWITTER DEMOGRAPHICS** MENDELEY

The data shown below were collected from the profiles of 37 tweeters who shared this research outp



Cochrane Database of Systematic Reviews | [Review - Diagnostic](#)

## Diagnostic test accuracy of telehealth assessment for dementia and mild cognitive impairment

Jenny McCleery, Julian Laverty, [✉ Terry J Quinn](#) Authors' declarations of interest

Version published: 20 July 2021 [Version history](#)

<https://doi.org/10.1002/14651858.CD013786.pub2>

Download PDF

Cite this Review

Print Comment Share Follow

Altmetric score 0

[85] McLean, Chandler, Nurmatov, Liu, Pagliari, Car and Sheikh (2010) Telehealthcare for asthma



**23**

**About this Attention Score**

In the top 25% of all research outputs scored by Altmetric

**Mentioned by**

- 1 news outlet
- 1 blog
- 2 policy sources
- 2 tweeters
- 1 Facebook page

**Citations**

- 121 Dimensions

**Readers on**

- 413 Mendeley
- 1 Connotea

**SUMMARY** | News | Blogs | Policy documents | Twitter | Facebook | Dimensions

---

**Title** Telehealthcare for asthma

**Published in** Cochrane database of systematic reviews, October 2010

**DOI** 10.1002/14651858.cd007717.pub2 [↗](#)

**Pubmed ID** 20927763 [↗](#)

**Authors** Susannah McLean, David Chandler, Ulugbek Nurmatov, Joseph LY Liu, Claudia Pagliari, Josip Car... [\[show\]](#)

**Abstract** Healthcare systems internationally need to consider new models of care to cater for the increasing... [\[show\]](#)

---

**TWITTER DEMOGRAPHICS** MENDELEY READERS

The data shown below were collected from the profiles of 2 tweeters who shared this research output. [Click here to](#)



[Cochrane Database of Systematic Reviews](#) | [Review - Intervention](#)

## Telehealthcare for asthma

✉ **Susannah McLean, David Chandler, Ulugbek Nurmatov, Joseph LY Liu, Claudia Pagliari, Josip Car, Aziz Sheikh**  
 Authors' declarations of interest

Version published: 06 October 2010 [Version history](#)

<https://doi.org/10.1002/14651858.CD007717.pub2> [↗](#)

### Abstract

[Collapse all](#) [Expand all](#)

[Unlock the full review](#) [➔](#)

[Download PDF](#)

[Cite this Review](#)

[Print](#)
[Comment](#)
[Share](#)
[Follow](#)

[Cited in 13 guidelines](#)

[86] McLean, Nurmatov, Liu, Pagliari, Car and Sheikh (2011) Telehealthcare for chronic obstructive pulmonary disease



**24**

About this Attention Score

In the top 25% of all research outputs scored by Altmetric

MORE...

Mentioned by

- 2 blogs
- 2 policy sources
- 2 tweeters
- 1 Facebook page
- 3 Wikipedia pages

Citations

- 211 Dimensions

Readers on

- 574 Mendeley
- 1 Connotea

**SUMMARY** | Blogs | Policy documents | Twitter | Facebook | Wikipedia

**Title** Telehealthcare for chronic obstructive pulmonary disease

**Published in** Cochrane database of systematic reviews, July 2011

**DOI** 10.1002/14651858.cd007718.pub2

**Pubmed ID** 21735417

**Authors** Susannah McLean, Ulugbek Nurmatov, Joseph LY Liu, Claudia Pagliari, Josip Car, Aziz Sheikh

**Abstract** Chronic obstructive pulmonary disease (COPD) is a disease of irreversible airways obstruction in... [show]

**TWITTER DEMOGRAPHICS** | MENDELEY READER

The data shown below were collected from the profiles of 2 tweeters who shared this research output. [Click here](#)



Cochrane Database of Systematic Reviews | Review - Intervention

## Telehealthcare for chronic obstructive pulmonary disease

Susannah McLean, Ulugbek Nurmatov, Joseph LY Liu, Claudia Pagliari, Josip Car, Aziz Sheikh | Authors' declarations of interest

Version published: 06 July 2011 | Version history

<https://doi.org/10.1002/14651858.CD007718.pub2>

[Collapse all](#) | [Expand all](#)

### Abstract

Unlock the full review

Download PDF

Cite this Review

Print | Comment | Share | Follow

Am score 0 | Cited in 18 guidelines

[87] Meyer, Atherton, Sawmynaden and Car (2012) Email for communicating results of diagnostic medical investigations to patients



**2**

[? About this Attention Score](#)

Average Attention Score compared to outputs of the same age

Mentioned by **3** tweeters

Citations **15** Dimensions

Readers on **111** Mendeley

**SUMMARY** | [Twitter](#) | [Dimensions citations](#)

**Title** Email for communicating results of diagnostic medical investigations to patients

**Published in** Cochrane database of systematic reviews, August 2012

**DOI** 10.1002/14651858.cd007980.pub2 [↗](#)

**Pubmed ID** 22895970 [↗](#)

**Authors** Barbara Meyer, Helen Atherton, Prescilla Sawmynaden, Josip Car

**Abstract** As medical care becomes more complex and the ability to test for conditions grows, pressure on... [\[show\]](#)

**TWITTER DEMOGRAPHICS** MENDELEY REAL

The data shown below were collected from the profiles of **3** tweeters who shared this research output. [Click h](#)



Cochrane Database of Systematic Reviews | [Review - Intervention](#)

## Email for communicating results of diagnostic medical investigations to patients

✉ [Barbara Meyer](#), [Helen Atherton](#), [Prescilla Sawmynaden](#), [Josip Car](#) [Authors' declarations of interest](#)

Version published: 15 August 2012 [Version history](#)

<https://doi.org/10.1002/14651858.CD007980.pub2> [↗](#)

**Unlock the full review** [▶](#)

[Download PDF](#)

[Cite this Review](#)

[Print](#) [Comment](#) [Share](#) [Follow](#)

[App](#) [score](#) 0

[Collapse all](#) [Expand all](#)

[88] Mistiaen and Poot (2006) Telephone follow-up, initiated by a hospital-based health professional, for postdischarge problems in patients discharged from hospital to home



**4**

About this Attention Score

Good Attention Score compared to outputs of the same age (65th percentile)

Mentioned by MORE...

- 1 policy source
- 1 tweeter

Citations

- 247 Dimensions

Readers on

- 437 Mendeley

**SUMMARY** | Policy documents | Twitter | Dimensions citations

---

**Title** Telephone follow-up, initiated by a hospital-based health professional, for postdischarge problems in patients discharged from hospital to home

**Published in** Cochrane database of systematic reviews, October 2006

**DOI** 10.1002/14651858.cd004510.pub3 [↗](#)

**Pubmed ID** 17054207 [↗](#)

**Authors** Patriek Mistiaen, Else Poot

**Abstract** It is known that many patients encounter a variety of problems in the first weeks after they have... [\[show\]](#)

---

**TWITTER DEMOGRAPHICS**

The data shown below were collected from the profile of 1 tweeter who shared this research output. [Click here to find out more about how](#)



**MENDELEY READERS**

Cochrane Database of Systematic Reviews | [Review - Intervention](#)

## Telephone follow-up, initiated by a hospital-based health professional, for postdischarge problems in patients discharged from hospital to home

[✉ Patriek Mistiaen, Else Poot](#) [Authors' declarations of interest](#)

Version published: 18 October 2006 [Version history](#)

<https://doi.org/10.1002/14651858.CD004510.pub3> [↗](#)

**Unlock the full review** ➤

Download PDF ▾

Cite this Review

[Print](#)

[Comment](#)

[Share](#)

[Follow](#)

am score 0

Cited in 2 guidelines



[89] Murray, Burns, See Tai, Lai and Nazareth (2005) Interactive Health Communication Applications for people with chronic disease



**10**

**About this Attention Score**

In the top 25% of all research outputs scored by Altmetric

**Mentioned by**

- 2 policy sources
- 4 tweeters

**Citations**

- 553 Dimensions

**Readers on**

- 887 Mendeley
- 12 CiteULike

**SUMMARY** | Policy documents | Twitter | Dimensions citations

**Title** Interactive Health Communication Applications for people with chronic disease

**Published in** Cochrane database of systematic reviews, October 2005

**DOI** 10.1002/14651858.cd004274.pub4

**Pubmed ID** 16235356

**Authors** Elizabeth Murray, Joanne Burns, Sharon See Tai, Rosalind Lai, Irwin Nazareth

**Abstract** Interactive Health Communication Applications (IHCA) are computer-based, usually web-based... [\[show\]](#)

**TWITTER DEMOGRAPHICS** MENDELEY REA

The data shown below were collected from the profiles of 4 tweeters who shared this research output. [Click](#)



Cochrane Database of Systematic Reviews | Review - Intervention

## Interactive Health Communication Applications for people with chronic disease

Elizabeth Murray, Joanne Burns, Sharon See Tai, Rosalind Lai, Irwin Nazareth Authors' declarations of interest

Version published: 19 October 2005 [Version history](#)

<https://doi.org/10.1002/14651858.CD004274.pub4>

**Abstract**

Unlock the full review >

Download PDF

Cite this Review

Print Comment Share Follow

Collapse all Expand all

Altmetric score 0 Cited in 4 guidelines

[90] Murtagh, Murphy, Milton, Roberts, O'Gorman and Foster (2020) Interventions outside the workplace for reducing sedentary behaviour in adults under 60 years of age



**46**

About this Attention Score

In the top 5% of all research outputs scored by Altmetric

MORE...

Mentioned by

- 2 blogs
- 53 tweeters
- 3 Facebook pages

Citations

- 13 Dimensions

Readers on

- 315 Mendeley

**SUMMARY** | Blogs | Twitter | Facebook | Dimensions citations

**Title** Interventions outside the workplace for reducing sedentary behaviour in adults under 60 years of age

**Published in** Cochrane database of systematic reviews, July 2020

**DOI** 10.1002/14651858.cd012554.pub2 [↗](#)

**Pubmed ID** 32678471 [↗](#)

**Authors** Elaine M Murtagh, Marie H Murphy, Karen Milton, Nia W Roberts, Clodagh SM O'Gorman, Charles... [\[show\]](#)

**TWITTER DEMOGRAPHICS** | MENDELEY

The data shown below were collected from the profiles of **53** tweeters who shared this research output.



Cochrane Database of Systematic Reviews | [Review](#) - [Intervention](#)

## Interventions outside the workplace for reducing sedentary behaviour in adults under 60 years of age

✉ Elaine M Murtagh, Marie H Murphy, Karen Milton, Nia W Roberts, Clodagh SM O'Gorman, Charles Foster  
Authors' declarations of interest

Version published: 17 July 2020 [Version history](#)

<https://doi.org/10.1002/14651858.CD012554.pub2> [↗](#)

Download PDF [↕](#)

Cite this Review

Print Comment Share Follow

Alt score 0

[91] Nagendran, Gurusamy, Aggarwal, Loizidou and Davidson (2013) Virtual reality training for surgical trainees in laparoscopic surgery



**72**

**About this Attention Score**

In the top 5% of all research outputs scored by Altmetric

**Mentioned by**

- 8 news outlets
- 1 blog
- 3 tweeters

**Citations**

- 297 Dimensions

**Readers on**

- 508 Mendeley

**SUMMARY**
News
Blogs
Twitter
Dimensions citations

|                     |                                                                                                                       |
|---------------------|-----------------------------------------------------------------------------------------------------------------------|
| <b>Title</b>        | Virtual reality training for surgical trainees in laparoscopic surgery                                                |
| <b>Published in</b> | Cochrane database of systematic reviews, August 2013                                                                  |
| <b>DOI</b>          | 10.1002/14651858.cd006575.pub3 <a href="#">↗</a>                                                                      |
| <b>Pubmed ID</b>    | 23980026 <a href="#">↗</a>                                                                                            |
| <b>Authors</b>      | Myura Nagendran, Kurinchi Selvan Gurusamy, Rajesh Aggarwal, Marilena Loizidou, Brian R Davidson                       |
| <b>Abstract</b>     | Standard surgical training has traditionally been one of apprenticeship, where the surgical... <a href="#">[show]</a> |

**TWITTER DEMOGRAPHICS**

---

The data shown below were collected from the profiles of **3** tweeters who shared this research output.



**MENDELEY**

Cochrane Database of Systematic Reviews | [Review - Intervention](#)

[New search](#) [Conclusions changed](#)

## Virtual reality training for surgical trainees in laparoscopic surgery

Myura Nagendran, [✉](#) Kurinchi Selvan Gurusamy, Rajesh Aggarwal, Marilena Loizidou, Brian R Davidson  
 Authors' declarations of interest

Version published: 27 August 2013 [Version history](#)

<https://doi.org/10.1002/14651858.CD006575.pub3> [↗](#)

[Download PDF](#)

[Cite this Review](#)

[Print](#)
[Comment](#)
[Share](#)
[Follow](#)

0
**Cited in 1 guideline**

[92] Noone, McSharry, Smalle, Burns, Dwan, Devane and Morrissey (2020) Video calls for reducing social isolation and loneliness in older people: a rapid review



**207**

About this Attention Score

In the top 5% of all research outputs scored by Altmetric

Mentioned by

- 2 news outlets
- 5 blogs
- 2 policy sources
- 246 tweeters
- 4 Facebook pages
- 2 Wikipedia pages

Citations

- 128 Dimensions

Readers on

- 794 Mendeley

**SUMMARY** News Blogs Policy documents Twitter Facebook

**Title** Video calls for reducing social isolation and loneliness in older people: a rapid review

**Published in** Cochrane database of systematic reviews, May 2020

**DOI** 10.1002/14651858.cd013632

**Pubmed ID** 32441330

**Authors** Chris Noone, Jenny McSharry, Mike Smalle, Annette Burns, Kerry Dwan, Declan Devane, Eimear C... [show]

**TWITTER DEMOGRAPHICS** MENDELEY F

The data shown below were collected from the profiles of **246** tweeters who shared this research output.



1 59

Cochrane Database of Systematic Reviews | Review - Rapid

## Video calls for reducing social isolation and loneliness in older people: a rapid review

✉ Chris Noone, Jenny McSharry, Mike Smalle, Annette Burns, Kerry Dwan, Declan Devane, Eimear C Morrissey

Authors' declarations of interest

Version published: 22 May 2020 Version history

<https://doi.org/10.1002/14651858.CD013632>

Download PDF

Cite this Review

Print Comment Share Follow

Altmetric score 0 Cited in 5 guidelines

Contents

[93] Odendaal, Anstey Watkins, Leon, Goudge, Griffiths, Tomlinson and Daniels (2020) Health workers' perceptions and experiences of using mHealth technologies to deliver primary healthcare services: a qualitative evidence synthesis



41

About this Attention Score

In the top 5% of all research outputs scored by Altmetric

Mentioned by

- 1 policy source
- 57 tweeters
- 3 Facebook pages
- 3 Wikipedia pages

Citations

- 131 Dimensions

Readers on

- 995 Mendeley

SUMMARY

Policy documents

Twitter

Facebook

Wikipedia

Dimensions citations

Title Health workers' perceptions and experiences of using mHealth technologies to deliver primary healthcare services: a qualitative evidence synthesis

Published in Cochrane database of systematic reviews, March 2020

DOI 10.1002/14651858.cd011942.pub2

Pubmed ID 32216074

Authors Willem A Odendaal, Jocelyn Anstey Watkins, Natalie Leon, Jane Goudge, Frances Griffiths, Mark... [show]

TWITTER DEMOGRAPHICS

MENDELEY READERS

The data shown below were collected from the profiles of 57 tweeters who shared this research output. [Click here to find out more about how!](#)



Cochrane Database of Systematic Reviews | Review - Qualitative

## Health workers' perceptions and experiences of using mHealth technologies to deliver primary healthcare services: a qualitative evidence synthesis

✉ Willem A Odendaal, Jocelyn Anstey Watkins, Natalie Leon, Jane Goudge, Frances Griffiths, Mark Tomlinson, Karen Daniels Authors' declarations of interest

Download PDF

Cite this Review

Print Comment Share Follow

Altmetric score 0

[94] Olthuis, Watt, Bailey, Hayden and Stewart (2016) Therapist-supported Internet cognitive behavioural therapy for anxiety disorders in adults



**50**

[? About this Attention Score](#)

In the top 5% of all research outputs scored by Altmetric

[MORE...](#)

**Mentioned by**

- 1 news outlet
- 1 blog
- 2 policy sources
- 39 tweeters
- 3 Facebook pages
- 8 Wikipedia pages

**Citations**

- 255 Dimensions

**Readers on**

- 651 Mendeley

**SUMMARY** | News | Blogs | Policy documents | Twitter | Facebook | W

---

**Title** Therapist-supported Internet cognitive behavioural therapy for anxiety disorders in adults

**Published in** Cochrane database of systematic reviews, March 2016

**DOI** 10.1002/14651858.cd011565.pub2 [↗](#)

**Pubmed ID** 26968204 [↗](#)

**Authors** Janine V Olthuis, Margo C Watt, Kristen Bailey, Jill A Hayden, Sherry H Stewart

**Abstract** Cognitive behavioural therapy (CBT) is an evidence-based treatment for anxiety disorders. Many... [\[show\]](#)

---

**TWITTER DEMOGRAPHICS** MENDELEY REAL

---

The data shown below were collected from the profiles of **39** tweeters who shared this research output. [Click](#)



1  13

Cochrane Database of Systematic Reviews | [Review - Intervention](#)

[New search](#)

## Therapist-supported Internet cognitive behavioural therapy for anxiety disorders in adults

✉ [Janine V Olthuis](#), [Margo C Watt](#), [Kristen Bailey](#), [Jill A Hayden](#), [Sherry H Stewart](#) [Authors' declarations of interest](#)

Version published: 12 March 2016 [Version history](#)

<https://doi.org/10.1002/14651858.CD011565.pub2> [↗](#)

[Download PDF](#)

[Cite this Review](#)

[Print](#)
[Comment](#)
[Share](#)
[Follow](#)

 score 0
[Cited in 2 guidelines](#)

[95] Pal, Eastwood, Michie, Farmer, Barnard, Peacock, Wood, Inniss and Murray (2013) Computer-based diabetes self-management interventions for adults with type 2 diabetes mellitus



**77**

About this Attention Score

In the top 5% of all research outputs scored by Altmetric

Mentioned by

- 2 news outlets
- 2 blogs
- 1 policy source
- 62 tweeters
- 4 Facebook pages
- 1 Wikipedia page

Citations

- 303 Dimensions

Readers on

- 1244 Mendeley
- 3 CiteULike

**SUMMARY** | News | Blogs | Policy documents | Twitter | Facebook | Wikipedia

**Title** Computer-based diabetes self-management interventions for adults with type 2 diabetes mellitus

**Published in** Cochrane database of systematic reviews, March 2013

**DOI** 10.1002/14651858.cd008776.pub2 [↗](#)

**Pubmed ID** 23543567 [↗](#)

**Authors** Kingshuk Pal, Sophie V Eastwood, Susan Michie, Andrew J Farmer, Maria L Barnard, Richard Peacock... [\[show\]](#)

**Abstract** Diabetes is one of the commonest chronic medical conditions, affecting around 347 million adults... [\[show\]](#)

---

**TWITTER DEMOGRAPHICS** MENDELEY READERS

The data shown below were collected from the profiles of **62** tweeters who shared this research output. [Click here to fir](#)



Cochrane Database of Systematic Reviews | [Review - Intervention](#)

## Computer-based diabetes self-management interventions for adults with type 2 diabetes mellitus

✉ Kingshuk Pal, Sophie V Eastwood, Susan Michie, Andrew J Farmer, Maria L Barnard, Richard Peacock, Bindie Wood, Joni D Inniss, Elizabeth Murray Authors' declarations of interest

Version published: 28 March 2013 [Version history](#)

<https://doi.org/10.1002/14651858.CD008776.pub2> [↗](#)

Download PDF ▼

Cite this Review

Print | Comment | Share | Follow

Alt scores 0 Cited in 2 guidelines

Contents

[96] Palmer, Henschke, Bergman, Villanueva, Maayan, Tamrat, Mehl, Glenton, Lewin, Fønhus and et al. (2020) Targeted client communication via mobile devices for improving maternal, neonatal, and child health



**13**

About this Attention Score

In the top 25% of all research outputs scored by Altmetric

Mentioned by

- 1 blog
- 8 tweeters
- 1 Facebook page

Citations

- 21 Dimensions

Readers on

- 613 Mendeley

**SUMMARY** Blogs Twitter Facebook Dimensions citations

**Title** Targeted client communication via mobile devices for improving maternal, neonatal, and child health

**Published in** Cochrane database of systematic reviews, July 2020

**DOI** 10.1002/14651858.cd013679

**Pubmed ID** 32813276

**Authors** Melissa J Palmer, Nicholas Henschke, Hanna Bergman, Gemma Villanueva, Nicola Maayan, Tigest Tamrat... [show]

**Abstract** The global burden of poor maternal, neonatal, and child health (MNCH) accounts for more than a... [show]

**TWITTER DEMOGRAPHICS** MENDELEY READERS

The data shown below were collected from the profiles of 8 tweeters who shared this research output. [Click here to](#)



Cochrane Database of Systematic Reviews | Review - Intervention

## Targeted client communication via mobile devices for improving maternal, neonatal, and child health

✉ Melissa J Palmer, Nicholas Henschke, Hanna Bergman, Gemma Villanueva, Nicola Maayan, Tigest Tamrat, Garrett L Mehl, Claire Glenton, Simon Lewin, Marita S Fønhus, Caroline Free Authors' declarations of interest

Version published: 14 July 2020 [Version history](#)  
<https://doi.org/10.1002/14651858.CD013679>

Download PDF

Cite this Review

Print Comment Share Follow

Altmetric score 0



[97] Palmer, Henschke, Villanueva, Maayan, Bergman, Glenton, Lewin, Fønhus, Tamrat, Mehl and et al. (2020) Targeted client communication via mobile devices for improving sexual and reproductive health



**64**

About this Attention Score

In the top 5% of all research outputs scored by Altmetric

Mentioned by

- 7 news outlets
- 24 tweeters
- 3 Facebook pages

Citations

- 31 Dimensions

Readers on

- 333 Mendeley

**SUMMARY** News Twitter Facebook Dimensions citations

**Title** Targeted client communication via mobile devices for improving sexual and reproductive health

**Published in** Cochrane database of systematic reviews, July 2020

**DOI** 10.1002/14651858.cd013680

**Pubmed ID** 32779730

**Authors** Melissa J Palmer, Nicholas Henschke, Gemma Villanueva, Nicola Maayan, Hanna Bergman, Claire Glenton... [\[show\]](#)

**TWITTER DEMOGRAPHICS** MENDELEY READERS

The data shown below were collected from the profiles of 24 tweeters who shared this research output. [Click here to](#)



Cochrane Database of Systematic Reviews | Review - Intervention

## Targeted client communication via mobile devices for improving sexual and reproductive health

✉ Melissa J Palmer, Nicholas Henschke, Gemma Villanueva, Nicola Maayan, Hanna Bergman, Claire Glenton, Simon Lewin, Marita S Fønhus, Tigest Tamrat, Garrett L Mehl, Caroline Free Authors' declarations of interest

Version published: 14 July 2020 [Version history](#)  
<https://doi.org/10.1002/14651858.CD013680>

Download PDF

Cite this Review

Print Comment Share Follow

Altmetric score 0

[98] Palmer, Machiyama, Woodd, Gubijev, Barnard, Russell, Perel and Free (2021) Mobile phone-based interventions for improving adherence to medication prescribed for the primary prevention of cardiovascular disease in adults



**8**

About this Attention Score

In the top 25% of all research outputs scored by Altmetric

Mentioned by **11** tweeters

Citations **18** Dimensions

Readers on **421** Mendeley

**SUMMARY** | Twitter | Dimensions citations

**Title** Mobile phone-based interventions for improving adherence to medication prescribed for the primary prevention of cardiovascular disease in adults

**Published in** Cochrane database of systematic reviews, March 2021

**DOI** 10.1002/14651858.cd012675.pub3

**Pubmed ID** 33769555

**Authors** Melissa J Palmer, Kazuyo Machiyama, Susannah Woodd, Anasztazia Gubijev, Sharmani Barnard, Sophie... [show]

**TWITTER DEMOGRAPHICS** | MENDELEY READERS

The data shown below were collected from the profiles of **11** tweeters who shared this research output. [Click here to find out more about how](#)



Cochrane Database of Systematic Reviews | [Review - Intervention](#)

## Mobile phone-based interventions for improving adherence to medication prescribed for the primary prevention of cardiovascular disease in adults

Melissa J Palmer, Kazuyo Machiyama, Susannah Woodd, Anasztazia Gubijev, Sharmani Barnard, Sophie Russell, Pablo Perel,  **Caroline Free** Authors' declarations of interest

Download PDF

Cite this Review

Print Comment Share Follow

Am score 0

[99] Pappas, Wei, Car, Majeed and Sheikh (2011) Computer-assisted versus oral-and-written family history taking for identifying people with elevated risk of type 2 diabetes mellitus



**4**

**About this Attention Score**

Good Attention Score compared to outputs of the same age (74th percentile)

**Mentioned by** MORE...

- 2 tweeters
- 3 Wikipedia pages

**Citations**

- 6 Dimensions

**Readers on**

- 241 Mendeley

| SUMMARY             | Twitter                                                                                                                               | Wikipedia | Dimensions citations |
|---------------------|---------------------------------------------------------------------------------------------------------------------------------------|-----------|----------------------|
| <b>Title</b>        | Computer-assisted versus oral-and-written family history taking for identifying people with elevated risk of type 2 diabetes mellitus |           |                      |
| <b>Published in</b> | Cochrane database of systematic reviews, December 2011                                                                                |           |                      |
| <b>DOI</b>          | 10.1002/14651858.cd008489.pub2 <a href="#">↗</a>                                                                                      |           |                      |
| <b>Pubmed ID</b>    | 22161431 <a href="#">↗</a>                                                                                                            |           |                      |
| <b>Authors</b>      | Yannis Pappas, Igor Wei, Josip Car, Azeem Majeed, Aziz Sheikh                                                                         |           |                      |
| <b>Abstract</b>     | Diabetes is a chronic illness characterised by insulin resistance or deficiency, resulting in... <a href="#">[show]</a>               |           |                      |

**TWITTER DEMOGRAPHICS**

---

The data shown below were collected from the profiles of **2** tweeters who shared this research output. [Click here to find out more](#)



**MENDELEY READERS**

Cochrane Database of Systematic Reviews | [Review - Intervention](#)

## Computer-assisted versus oral-and-written family history taking for identifying people with elevated risk of type 2 diabetes mellitus

Yannis Pappas, Igor Wei, [✉ Josip Car](#), Azeem Majeed, Aziz Sheikh Authors' declarations of interest

Version published: 07 December 2011 [Version history](#)

<https://doi.org/10.1002/14651858.CD008489.pub2> [↗](#)

**Unlock the full review** ➤

Download PDF ▾

↻ Cite this Review

Print
 Comment
 Share
 Follow

Collapse all Expand all

[100] Petkovic, Duench, Trawin, Dewidar, Pardo Pardo, Simeon, DesMeules, Gagnon, Hatcher Roberts, Hossain and et al. (2021) Behavioural interventions delivered through interactive social media for health behaviour change, health outcomes, and health equity in the adult population

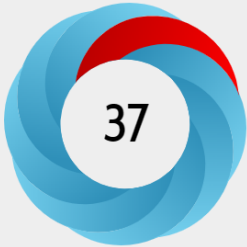

**37**

[About this Attention Score](#)

In the top 5% of all research outputs scored by Altmetric

Mentioned by

- 2 news outlets
- 37 tweeters

Citations

- 45 Dimensions

Readers on

- 502 Mendeley

**SUMMARY** | News | Twitter | Dimensions citations

**Title** Behavioural interventions delivered through interactive social media for health behaviour change, health outcomes, and health equity in the adult population

**Published in** Cochrane database of systematic reviews, May 2021

**DOI** 10.1002/14651858.cd012932.pub2

**Pubmed ID** 34057201

**Authors** Jennifer Petkovic, Stephanie Duench, Jessica Trawin, Omar Dewidar, Jordi Pardo Pardo, Rosiane... [\[show\]](#)

---

**TWITTER DEMOGRAPHICS** | MENDELEY READERS

The data shown below were collected from the profiles of 37 tweeters who shared this research output. [Click here to find out more about how the inf](#)



Cochrane Database of Systematic Reviews | [Review - Intervention](#)

## Behavioural interventions delivered through interactive social media for health behaviour change, health outcomes, and health equity in the adult population

✉ Jennifer Petkovic, Stephanie Duench, Jessica Trawin, Omar Dewidar, Jordi Pardo Pardo, Rosiane Simeon, Marie DesMeules, Diane Gagnon, Janet Hatcher Roberts, Alomgir Hossain, Kevin Pottie, Tamara Rader, Peter Tugwell, Manosila Yoganathan, Justin Presseau<sup>a</sup>, Vivian Welch<sup>a</sup> Authors' declarations of interest

Download PDF

Cite this Review

Print | Comment | Share | Follow

Alt score 0

Contents

[101] Piomchai, Avery, Laopaiboon, Kennedy and O'Leary (2015) Virtual reality training for improving the skills needed for performing surgery of the ear, nose or throat



**8**

**About this Attention Score**

In the top 25% of all research outputs scored by Altmetric

**Mentioned by**  
12 tweeters

**Citations**  
123 Dimensions

**Readers on**  
435 Mendeley  
1 CiteULike

**SUMMARY** | Twitter | Dimensions citations

**Title** Virtual reality training for improving the skills needed for performing surgery of the ear, nose or throat

**Published in** Cochrane database of systematic reviews, September 2015

**DOI** 10.1002/14651858.cd010198.pub2

**Pubmed ID** 26352008

**Authors** Patorn Piromchai, Alex Avery, Malinee Laopaiboon, Gregor Kennedy, Stephen O'Leary

**Abstract** Virtual reality simulation uses computer-generated imagery to present a simulated training... [\[show\]](#)

**TWITTER DEMOGRAPHICS** | MENDELEY RE

The data shown below were collected from the profiles of **12** tweeters who shared this research output. [Click](#)



Cochrane Database of Systematic Reviews | [Review - Intervention](#)

## Virtual reality training for improving the skills needed for performing surgery of the ear, nose or throat

✉ Patorn Piromchai, Alex Avery, Malinee Laopaiboon, Gregor Kennedy, Stephen O'Leary [Authors' declarations of interest](#)

Version published: 09 September 2015 [Version history](#)

<https://doi.org/10.1002/14651858.CD010198.pub2>

Download PDF

Cite this Review

Print Comment Share Follow

Alt scores 0

[102] Pollock, Farmer, Brady, Langhorne, Mead, Mehrholz and van Wijck (2014) Interventions for improving upper limb function after stroke



**85**

**About this Attention Score**

In the top 5% of all research outputs scored by Altmetric

**Mentioned by**

- 2 news outlets
- 3 blogs
- 1 policy source
- 61 tweeters
- 5 Facebook pages
- 3 Wikipedia pages
- 3 Google+ users

**Citations**

- 573 Dimensions

**Readers on**

- 1301 Mendeley
- 2 CiteULike

**SUMMARY** | News | Blogs | Policy documents | Twitter | Facebook

---

**Title** Interventions for improving upper limb function after stroke

**Published in** Cochrane database of systematic reviews, November 2014

**DOI** 10.1002/14651858.cd010820.pub2 [↗](#)

**Pubmed ID** 25387001 [↗](#)

**Authors** Alex Pollock, Sybil E Farmer, Marian C Brady, Peter Langhorne, Gillian E Mead, Jan Mehrholz... [\[show\]](#)

---

**TWITTER DEMOGRAPHICS** MENDELEY I

---

The data shown below were collected from the profiles of **61** tweeters who shared this research output. [↗](#)

**Geographical breakdown**



1  14

**Demographic breakd**

Cochrane Database of Systematic Reviews | [Review - Overview](#)

## Interventions for improving upper limb function after stroke

✉ Alex Pollock, Sybil E Farmer, Marian C Brady, Peter Langhorne, Gillian E Mead, Jan Mehrholz, Frederike van Wijck

Authors' declarations of interest

Version published: 12 November 2014 [Version history](#)

<https://doi.org/10.1002/14651858.CD010820.pub2> [↗](#)

Download PDF ▼

---

Cite this Review

Print
Comment
Share
Follow

---

0 Cited in 11 guidelines

[Collapse all](#) [Expand all](#)

**Contents**

[103] Posadzki, Mastellos, Ryan, Gunn, Felix, Pappas, Gagnon, Julious, Xiang, Oldenburg and et al. (2016) Automated telephone communication systems for preventive healthcare and management of long-term conditions



**61**

**About this Attention Score**

In the top 5% of all research outputs scored by Altmetric

**Mentioned by** MORE...

- 6 news outlets
- 25 tweeters
- 4 Facebook pages

**Citations**

- 99 Dimensions

**Readers on**

- 2172 Mendeley

| SUMMARY             | News                                                                                                                           | Twitter | Facebook | Dimensions citations |
|---------------------|--------------------------------------------------------------------------------------------------------------------------------|---------|----------|----------------------|
| <b>Title</b>        | Automated telephone communication systems for preventive healthcare and management of long-term conditions                     |         |          |                      |
| <b>Published in</b> | Cochrane database of systematic reviews, December 2016                                                                         |         |          |                      |
| <b>DOI</b>          | 10.1002/14651858.cd009921.pub2 <a href="#">↗</a>                                                                               |         |          |                      |
| <b>Pubmed ID</b>    | 27960229 <a href="#">↗</a>                                                                                                     |         |          |                      |
| <b>Authors</b>      | Pawel Posadzki, Nikolaos Mastellos, Rebecca Ryan, Laura H Gunn, Lambert M Felix, Yannis Pappas... <a href="#">[show]</a>       |         |          |                      |
| <b>Abstract</b>     | Automated telephone communication systems (ATCS) can deliver voice messages and collect health-relat... <a href="#">[show]</a> |         |          |                      |

**TWITTER DEMOGRAPHICS**

---

The data shown below were collected from the profiles of **25** tweeters who shared this research output. [Click here to find](#)



**MENDELEY READERS**

Cochrane Database of Systematic Reviews | [Review - Intervention](#)

## Automated telephone communication systems for preventive healthcare and management of long-term conditions

Pawel Posadzki, Nikolaos Mastellos, Rebecca Ryan, Laura H Gunn, Lambert M Felix, Yannis Pappas, Marie-Pierre Gagnon, Steven A Julious, Liming Xiang, Brian Oldenburg, [✉ Josip Car](#) Authors' declarations of interest

Version published: 14 December 2016 [Version history](#)

<https://doi.org/10.1002/14651858.CD009921.pub2> [↗](#)

[Download PDF](#)

[Cite this Review](#)

[Print](#)
[Comment](#)
[Share](#)
[Follow](#)

[Altmetric score](#) 0 [Cited in 2 guidelines](#)

[104] Raman, Shepherd, Dowswell, Middleton and Crowther (2017) Different methods and settings for glucose monitoring for gestational diabetes during pregnancy



**21**

**About this Attention Score**

In the top 25% of all research outputs scored by Altmetric

**Mentioned by**

- 2 policy sources
- 21 tweeters
- 10 Facebook pages

**Citations**

- 42 Dimensions

**Readers on**

- 627 Mendeley

| SUMMARY                                                                                                                                      | Policy documents | Twitter | Facebook | Dimensions citations |
|----------------------------------------------------------------------------------------------------------------------------------------------|------------------|---------|----------|----------------------|
| <b>Title</b> Different methods and settings for glucose monitoring for gestational diabetes during pregnancy                                 |                  |         |          |                      |
| <b>Published in</b> Cochrane database of systematic reviews, October 2017                                                                    |                  |         |          |                      |
| <b>DOI</b> 10.1002/14651858.cd011069.pub2 <a href="#">↗</a>                                                                                  |                  |         |          |                      |
| <b>Pubmed ID</b> 29081069 <a href="#">↗</a>                                                                                                  |                  |         |          |                      |
| <b>Authors</b> Puvaneswary Raman, Emily Shepherd, Therese Dowswell, Philippa Middleton, Caroline A Crowther                                  |                  |         |          |                      |
| <b>Abstract</b> Incidence of gestational diabetes mellitus (GDM) is increasing worldwide. Blood glucose monitoring... <a href="#">[show]</a> |                  |         |          |                      |

**TWITTER DEMOGRAPHICS**

**MENDELEY**

The data shown below were collected from the profiles of **21** tweeters who shared this research output. [↗](#)



Cochrane Database of Systematic Reviews | [Review - Intervention](#)

## Different methods and settings for glucose monitoring for gestational diabetes during pregnancy

Puvaneswary Raman, [✉](#) Emily Shepherd, Therese Dowswell, Philippa Middleton, Caroline A Crowther  
 Authors' declarations of interest

Version published: 29 October 2017 [Version history](#)

<https://doi.org/10.1002/14651858.CD011069.pub2> [↗](#)

[Download PDF](#)

[Cite this Review](#)

[Print](#)
[Comment](#)
[Share](#)
[Follow](#)

score 0

**Contents**



[105] Ream, Hughes, Cox, Skarparis, Richardson, Pedersen, Wiseman, Forbes and Bryant (2020)  
Telephone interventions for symptom management in adults with cancer



**112**

? About this Attention Score

In the top 5% of all research outputs scored by Altmetric

Mentioned by

- 6 news outlets
- 107 tweeters
- 4 Facebook pages

Citations

- 51 Dimensions

Readers on

- 392 Mendeley

**SUMMARY** News Twitter Facebook Dimensions citations

**Title** Telephone interventions for symptom management in adults with cancer

**Published in** Cochrane database of systematic reviews, June 2020

**DOI** 10.1002/14651858.cd007568.pub2 [↗](#)

**Pubmed ID** 32483832 [↗](#)

**Authors** Emma Ream, Amanda Euesden Hughes, Anna Cox, Katy Skarparis, Alison Richardson, Vibe H Pedersen... [\[show\]](#)

**TWITTER DEMOGRAPHICS** MENDELEY READ

The data shown below were collected from the profiles of **107** tweeters who shared this research output. [Click](#)



Cochrane Database of Systematic Reviews | [Review - Intervention](#)

## Telephone interventions for symptom management in adults with cancer

✉ Emma Ream, Amanda Euesden Hughes, Anna Cox, Katy Skarparis, Alison Richardson, Vibe H Pedersen, Theresa Wiseman, Angus Forbes, Andrew Bryant [Authors' declarations of interest](#)

Version published: 02 June 2020 [Version history](#)

<https://doi.org/10.1002/14651858.CD007568.pub2> [↗](#)

Download PDF [↕](#)

[↻](#) Cite this Review

Print Comment Share Follow

[Any](#) score 0

Contents

[106] Reeves, Pelone, Harrison, Goldman and Zwarenstein (2017) Interprofessional collaboration to improve professional practice and healthcare outcomes



**95**

**About this Attention Score**

In the top 5% of all research outputs scored by Altmetric

**Mentioned by**

- 2 news outlets
- 129 tweeters
- 2 Facebook pages

**Citations**

- 596 Dimensions

**Readers on**

- 1414 Mendeley
- 1 CiteULike

**SUMMARY**
News
Twitter
Facebook
Dimensions citations

|                     |                                                                                                                           |
|---------------------|---------------------------------------------------------------------------------------------------------------------------|
| <b>Title</b>        | Interprofessional collaboration to improve professional practice and healthcare outcomes                                  |
| <b>Published in</b> | Cochrane database of systematic reviews, June 2017                                                                        |
| <b>DOI</b>          | 10.1002/14651858.cd000072.pub3 <a href="#">↗</a>                                                                          |
| <b>PubMed ID</b>    | 28639262 <a href="#">↗</a>                                                                                                |
| <b>Authors</b>      | Scott Reeves, Ferruccio Pelone, Reema Harrison, Joanne Goldman, Merrick Zwarenstein                                       |
| <b>Abstract</b>     | Poor interprofessional collaboration (IPC) can adversely affect the delivery of health services... <a href="#">[show]</a> |

**TWITTER DEMOGRAPHICS**

The data shown below were collected from the profiles of **129** tweeters who shared this research output.



**MENDELEY**

Cochrane Database of Systematic Reviews | [Review - Intervention](#)

## Interprofessional collaboration to improve professional practice and healthcare outcomes

Scott Reeves<sup>a</sup>, Ferruccio Pelone, Reema Harrison, Joanne Goldman, [✉ Merrick Zwarenstein](#) Authors' declarations of interest

Version published: 22 June 2017 [Version history](#)

<https://doi.org/10.1002/14651858.CD000072.pub3> [↗](#)

Download PDF

---

Cite this Review

Print
 Comment
 Share
 Follow

---

score 0

Cited in 3 guidelines

[107] Richards, Thorogood, Hillsdon and Foster (2013) Face-to-face versus remote and web 2.0 interventions for promoting physical activity



**25**

**About this Attention Score**

In the top 25% of all research outputs scored by Altmetric

**Mentioned by** MORE...

- 2 blogs
- 1 policy source
- 13 tweeters
- 2 Facebook pages

**Citations**

- 41 Dimensions

**Readers on**

- 239 Mendeley

**SUMMARY** Blogs Policy documents Twitter Facebook Dimensions citations

**Title** Face-to-face versus remote and web 2.0 interventions for promoting physical activity

**Published in** Cochrane database of systematic reviews, September 2013

**DOI** 10.1002/14651858.cd010393.pub2

**Pubmed ID** 24085593

**Authors** Richards J, Thorogood M, Hillsdon M, Foster C, Richards, Justin, Thorogood, Margaret, Hillsdon... [show]

**Abstract** Face-to-face interventions for promoting physical activity (PA) are continuing to be popular as... [show]

**TWITTER DEMOGRAPHICS** MENDELEY READERS

The data shown below were collected from the profiles of **13** tweeters who shared this research output. [Click here](#)



Cochrane Database of Systematic Reviews | [Review - Intervention](#)

## Face-to-face versus remote and web 2.0 interventions for promoting physical activity

Justin Richards, Margaret Thorogood, Melvyn Hillsdon, [✉ Charles Foster](#) Authors' declarations of interest

Version published: 01 October 2013 [Version history](#)

<https://doi.org/10.1002/14651858.CD010393.pub2>

Download PDF

Cite this Review

Print Comment Share Follow

Alt score 0 Cited in 1 guideline

[108] Roberts, Lloyd, Välimäki, Ho, Freemantle and Békefi (2021) Video games for people with schizophrenia



**27**

About this Attention Score

In the top 25% of all research outputs scored by Altmetric

Mentioned by

- 43 tweeters
- 4 Facebook pages

Citations

- 10 Dimensions

Readers on

- 219 Mendeley

**SUMMARY** | Twitter | Facebook | Dimensions citations

**Title** Video games for people with schizophrenia

**Published in** Cochrane database of systematic reviews, February 2021

**DOI** 10.1002/14651858.cd012844.pub2

**Pubmed ID** 33539561

**Authors** Matthew T Roberts, Jack Lloyd, Maritta Välimäki, Grace WK Ho, Megan Freemantle, Anna Zsófia Békefi... [show]

**Abstract** Commercial video games are a vastly popular form of recreational activity. Whilst concerns persist... [show]

**TWITTER DEMOGRAPHICS** | MENDELEY READER

The data shown below were collected from the profiles of **43** tweeters who shared this research output. [Click her](#)



Cochrane Database of Systematic Reviews | [Review - Intervention](#)

## Video games for people with schizophrenia

✉ **Matthew T Roberts, Jack Lloyd, Maritta Välimäki, Grace WK Ho, Megan Freemantle, Anna Zsófia Békefi**

Authors' declarations of interest

Version published: 04 February 2021 [Version history](#)

<https://doi.org/10.1002/14651858.CD012844.pub2>

Download PDF

Cite this Review

Print Comment Share Follow

Altmetric score 0 Cited in 1 guideline

[Collapse all](#) [Expand all](#)

Contents

[109] Sawmynaden, Atherton, Majeed and Car (2012) Email for the provision of information on disease prevention and health promotion



**22**

About this Attention Score

In the top 25% of all research outputs scored by Altmetric

MORE...

Mentioned by

- 2 blogs
- 12 tweeters

Citations

- 37 Dimensions

Readers on

- 272 Mendeley

**SUMMARY** | Blogs | Twitter | Dimensions citations

**Title** Email for the provision of information on disease prevention and health promotion

**Published in** Cochrane database of systematic reviews, November 2012

**DOI** 10.1002/14651858.cd007982.pub2

**Pubmed ID** 23152250

**Authors** Prescilla Sawmynaden, Helen Atherton, Azeem Majeed, Josip Car

**Abstract** Email is a popular and commonly used method of communication, but its use in health care is not... [show]

**TWITTER DEMOGRAPHICS** | MENDELEY READERS

The data shown below were collected from the profiles of **12** tweeters who shared this research output. [Click here](#)



Cochrane Database of Systematic Reviews | [Review - Intervention](#)

## Email for the provision of information on disease prevention and health promotion

✉ Prescilla Sawmynaden, Helen Atherton, Azeem Majeed, Josip Car Authors' declarations of interest

Version published: 14 November 2012 [Version history](#)

<https://doi.org/10.1002/14651858.CD007982.pub2>

Unlock the full review >

Download PDF

Cite this Review

Print Comment Share Follow

Collapse all Expand all

Alt score 0

### Abstract

[110] Shojania, Jennings, Ramsay, Grimshaw, Kwan and Lo (2009) The effects of on-screen, point of care computer reminders on processes and outcomes of care



**31**

**About this Attention Score**

In the top 5% of all research outputs scored by Altmetric

**Mentioned by**

- 1 news outlet
- 2 blogs
- 3 policy sources
- 1 tweeter

**Citations**

- 392 Dimensions

**Readers on**

- 468 Mendeley
- 2 CiteULike

**SUMMARY** | News | Blogs | Policy documents | Twitter | Dimensions citations

**Title** The effects of on-screen, point of care computer reminders on processes and outcomes of care

**Published in** Cochrane database of systematic reviews, July 2009

**DOI** 10.1002/14651858.cd001096.pub2 [↗](#)

**Pubmed ID** 19588323 [↗](#)

**Authors** Kaveh G Shojania, Alison Jennings, Craig R Ramsay, Jeremy M Grimshaw, Janice L Kwan, Lisha Lo

**TWITTER DEMOGRAPHICS** MENDELEY READERS

---

The data shown below were collected from the profile of 1 tweeter who shared this research output. [Click here to i](#)



Cochrane Database of Systematic Reviews | [Review - Intervention](#)

## The effects of on-screen, point of care computer reminders on processes and outcomes of care

Kaveh G Shojania, Alison Jennings, Craig R Ramsay, Jeremy M Grimshaw, [✉ Janice L Kwan](#), Lisha Lo

Authors' declarations of interest

Version published: 08 July 2009 [Version history](#)

<https://doi.org/10.1002/14651858.CD001096.pub2> [↗](#)

**Unlock the full review** [➤](#)

[Download PDF](#)

[Cite this Review](#)

[Print](#) [Comment](#) [Share](#) [Follow](#)

 **Cited in 3 guidelines**

[Collapse all](#) [Expand all](#)

[111] Simon, Robertson, Lewis, Roberts, Bethell, Dawson and Bisson (2021) Internet-based cognitive and behavioural therapies for post-traumatic stress disorder (PTSD) in adults



**38**

**About this Attention Score**

In the top 5% of all research outputs scored by Altmetric

**Mentioned by** MORE...

- 2 blogs
- 42 tweeters
- 2 Facebook pages
- 1 Wikipedia page

**Citations**

- 19 Dimensions

**Readers on**

- 330 Mendeley

**SUMMARY** Blogs Twitter Facebook Wikipedia Dimensions citations

**Title** Internet-based cognitive and behavioural therapies for post-traumatic stress disorder (PTSD) in adults

**Published in** Cochrane database of systematic reviews, May 2021

**DOI** 10.1002/14651858.cd011710.pub3

**Pubmed ID** 34015141

**Authors** Natalie Simon, Lindsay Robertson, Catrin Lewis, Neil P Roberts, Andrew Bethell, Sarah Dawson... [show]

**TWITTER DEMOGRAPHICS** MENDELEY REA

The data shown below were collected from the profiles of 42 tweeters who shared this research output. [Click](#)



Cochrane Database of Systematic Reviews | [Review - Intervention](#)

## Internet-based cognitive and behavioural therapies for post-traumatic stress disorder (PTSD) in adults

✉ [Natalie Simon](#), [Lindsay Robertson](#), [Catrin Lewis](#), [Neil P Roberts](#), [Andrew Bethell](#), [Sarah Dawson](#), [Jonathan I Bisson](#)  
Authors' declarations of interest

Version published: 20 May 2021 [Version history](#)

<https://doi.org/10.1002/14651858.CD011710.pub3>

New search

Download PDF

Cite this Review

Print Comment Share Follow

Any score 0 Cited in 1 guideline

[112] Sjøstrand, Kefalianos, Hofslundsen, Guttormsen, Kirmess, Lervåg, Hulme and Bottegaard Næss (2021) Non-pharmacological interventions for stuttering in children six years and younger



**28**

**About this Attention Score**

In the top 25% of all research outputs scored by Altmetric

**Mentioned by** MORE...

- 1 blog
- 38 tweeters
- 2 Facebook pages

**Citations**

- 5 Dimensions

**Readers on**

- 95 Mendeley

**SUMMARY** Blogs Twitter Facebook Dimensions citations

**Title** Non-pharmacological interventions for stuttering in children six years and younger

**Published in** Cochrane database of systematic reviews, September 2021

**DOI** 10.1002/14651858.cd013489.pub2 [↗](#)

**Pubmed ID** 34499348 [↗](#)

**Authors** Åse Sjøstrand, Elaina Kefalianos, Hilde Hofslundsen, Linn S Guttormsen, Melanie Kirmess, Arne... [\[show\]](#)

**TWITTER DEMOGRAPHICS** MENDELEY REAL

The data shown below were collected from the profiles of **38** tweeters who shared this research output. [Click](#)



Cochrane Database of Systematic Reviews | [Review - Intervention](#)

## Non-pharmacological interventions for stuttering in children six years and younger

✉ Åse Sjøstrand, Elaina Kefalianos, Hilde Hofslundsen, Linn S Guttormsen, Melanie Kirmess, Arne Lervåg, Charles Hulme, Kari-Anne Bottegaard Næss Authors' declarations of interest

Version published: 09 September 2021 [Version history](#)

<https://doi.org/10.1002/14651858.CD013489.pub2> [↗](#)

Download PDF [↕](#)

Cite this Review [↗](#)

Print Comment Share Follow

Alt score 0

Contents



# [113] Smith, Gold, Ngo, Sumpter and Free (2015) Mobile phone-based interventions for improving contraception use



**20**

About this Attention Score

In the top 25% of all research outputs scored by Altmetric

Mentioned by

- 2 blogs
- 12 tweeters
- 1 Facebook page

Citations

- 107 Dimensions

Readers on

- 478 Mendeley

**SUMMARY** Blogs Twitter Facebook Dimensions citations

**Title** Mobile phone-based interventions for improving contraception use

**Published in** Cochrane database of systematic reviews, June 2015

**DOI** 10.1002/14651858.cd011159.pub2

**Pubmed ID** 26115146

**Authors** Chris Smith, Judy Gold, Thoai D Ngo, Colin Sumpter, Caroline Free

**Abstract** Contraception provides significant benefits for women's and children's health, yet an estimated... [show]

**TWITTER DEMOGRAPHICS** MENDELEY READERS

The data shown below were collected from the profiles of 12 tweeters who shared this research output. [Click here to fit](#)



Cochrane Database of Systematic Reviews | [Review - Intervention](#)

## Mobile phone-based interventions for improving contraception use

✉ [Chris Smith](#), [Judy Gold](#), [Thoai D Ngo](#), [Colin Sumpter](#), [Caroline Free](#) [Authors' declarations of interest](#)

Version published: 26 June 2015 [Version history](#)

<https://doi.org/10.1002/14651858.CD011159.pub2>

Download PDF

Cite this Review

Print Comment Share Follow

Collapse all Expand all

Alt score 0

Cited in 7 guidelines

[114] Smith, Calthorpe, Herbert and Smyth (2023) Digital technology for monitoring adherence to inhaled therapies in people with cystic fibrosis

1 About this Attention Score

Average Attention Score compared to outputs of the same age

Mentioned by

2 tweeters

Citations

1 Dimensions

Readers on

50 Mendeley

SUMMARY

Twitter

Dimensions citations

**Title** Digital technology for monitoring adherence to inhaled therapies in people with cystic fibrosis  
**Published in** Cochrane database of systematic reviews, February 2023  
**DOI** 10.1002/14651858.cd013733.pub2 [↗](#)  
**Pubmed ID** 36734528 [↗](#)  
**Authors** Sherie Smith, Rebecca Calthorpe, Sophie Herbert, Alan R Smyth

TWITTER DEMOGRAPHICS

MENDELEY

The data shown below were collected from the profiles of 2 tweeters who shared this research output. [↗](#)

Cochrane Database of Systematic Reviews | [Review](#) - [Intervention](#)

### Digital technology for monitoring adherence to inhaled therapies in people with cystic fibrosis

✉ [Sherie Smith, Rebecca Calthorpe, Sophie Herbert, Alan R Smyth](#) Authors' declarations of interest  
Version published: 03 February 2023 [Version history](#)  
<https://doi.org/10.1002/14651858.CD013733.pub2> [↗](#)

Unlock the full review [➤](#)

Download PDF [↕](#)

Cite this Review

Print Comment Share Follow

Alt score 0

[Collapse all](#) [Expand all](#)

[115] Stevenson, Campbell, Webster, Chow, Tong, Craig, Campbell and Lee (2019) eHealth interventions for people with chronic kidney disease



19

**About this Attention Score**

In the top 25% of all research outputs scored by Altmetric

**Mentioned by** MORE...

- 28 tweeters
- 3 Facebook pages
- 3 Wikipedia pages

**Citations**

- 64 Dimensions

**Readers on**

- 583 Mendeley

SUMMARY
Twitter
Facebook
Wikipedia
Dimensions citations

|                     |                                                                                                                          |
|---------------------|--------------------------------------------------------------------------------------------------------------------------|
| <b>Title</b>        | eHealth interventions for people with chronic kidney disease                                                             |
| <b>Published in</b> | Cochrane database of systematic reviews, August 2019                                                                     |
| <b>DOI</b>          | 10.1002/14651858.cd012379.pub2 <a href="#">↗</a>                                                                         |
| <b>Pubmed ID</b>    | 31425608 <a href="#">↗</a>                                                                                               |
| <b>Authors</b>      | Jessica K Stevenson, Zoe C Campbell, Angela C Webster, Clara K Chow, Allison Tong, Jonathan C Craig... <a href="#">↗</a> |

TWITTER DEMOGRAPHICS
MENDEL

---

The data shown below were collected from the profiles of **28** tweeters who shared this research output



Cochrane Database of Systematic Reviews | [Review - Intervention](#)

## eHealth interventions for people with chronic kidney disease

✉ [Jessica K Stevenson](#), [Zoe C Campbell](#), [Angela C Webster](#), [Clara K Chow](#), [Allison Tong](#), [Jonathan C Craig](#), [Katrina L Campbell](#), [Vincent WS Lee](#) Authors' declarations of interest

Version published: 06 August 2019 [Version history](#)

<https://doi.org/10.1002/14651858.CD012379.pub2> [↗](#)

[Download PDF](#)

[Cite this Review](#)

[Print](#)
[Comment](#)
[Share](#)
[Follow](#)

score 0

[Collapse all](#) [Expand all](#)

**Contents**

[116] Tailor, Ludden, Bossi, Bunce, Greenwood and Dahlmann-Noor (2022) Binocular versus standard occlusion or blurring treatment for unilateral amblyopia in children aged three to eight years



19

About this Attention Score

In the top 25% of all research outputs scored by Altmetric

Mentioned by

- 1 blog
- 12 tweeters
- 1 Wikipedia page

Citations

- 3 Dimensions

Readers on

- 83 Mendeley

**SUMMARY** Blogs Twitter Wikipedia Dimensions citations

**Title** Binocular versus standard occlusion or blurring treatment for unilateral amblyopia in children aged three to eight years

**Published in** Cochrane database of systematic reviews, February 2022

**DOI** 10.1002/14651858.cd011347.pub3

**Pubmed ID** 35129211

**Authors** Vijay Tailor, Siobhan Ludden, Manuela Bossi, Catey Bunce, John A Greenwood, Annegret Dahlmann-Noor... [show]

**TWITTER DEMOGRAPHICS** MENDELEY READERS

The data shown below were collected from the profiles of 12 tweeters who shared this research output. [Click here to](#)



Cochrane Database of Systematic Reviews | [Review - Intervention](#)

## Binocular versus standard occlusion or blurring treatment for unilateral amblyopia in children aged three to eight years

Vijay Tailor, Siobhan Ludden, Manuela Bossi, Catey Bunce, John A Greenwood, Annegret Dahlmann-Noor

Authors' declarations of interest

Version published: 07 February 2022 [Version history](#)

<https://doi.org/10.1002/14651858.CD011347.pub3>

Download PDF

Cite this Review

Print Comment Share Follow

Altmetric score 0

[117] Tan, Dear and Newell (2005) Clinical decision support systems for neonatal care

# Clinical decision support systems for neonatal care

Overview of attention for article published in Cochrane database of systematic reviews, April 2005

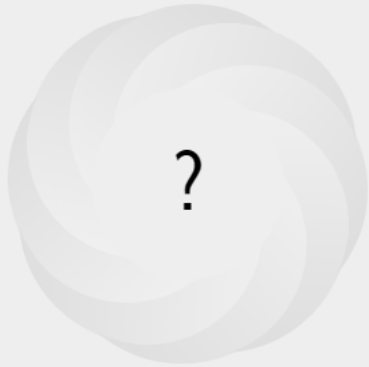

## Citations

 33 Dimensions

## Readers on

 211 Mendeley

## SUMMARY

Dimensions citations

**Title** Clinical decision support systems for neonatal care  
**Published in** Cochrane database of systematic reviews, April 2005  
**DOI** 10.1002/14651858.cd004211.pub2 [↗](#)  
**Pubmed ID** 15846701 [↗](#)  
**Authors** Kenneth Tan, Peter RF Dear, Simon J Newell

 The data shown below were compiled from readership statistics for **211** Men

Cochrane Database of Systematic Reviews | [Review - Intervention](#)

## Clinical decision support systems for neonatal care

 [Kenneth Tan, Peter RF Dear, Simon J Newell](#) [Authors' declarations of interest](#)

Version published: 20 April 2005 [Version history](#)

<https://doi.org/10.1002/14651858.CD004211.pub2> [↗](#)

[Collapse all](#) [Expand all](#)

## Abstract

Available in [English](#) | [Español](#)

Unlock the full review [>](#)

 Download PDF [▾](#)

[↻](#) Cite this Review

|                                                                                             |                                                                                               |                                                                                             |                                                                                              |
|---------------------------------------------------------------------------------------------|-----------------------------------------------------------------------------------------------|---------------------------------------------------------------------------------------------|----------------------------------------------------------------------------------------------|
|  Print |  Comment |  Share |  Follow |
|---------------------------------------------------------------------------------------------|-----------------------------------------------------------------------------------------------|---------------------------------------------------------------------------------------------|----------------------------------------------------------------------------------------------|

 Art score 0

[118] Tan and Lai (2012) Telemedicine for the support of parents of high-risk newborn infants



Mentioned by

- 1 Facebook page

Citations

- 28 Dimensions

Readers on

- 300 Mendeley

**SUMMARY**    Facebook    Dimensions citations

---

**Title**    Telemedicine for the support of parents of high-risk newborn infants

---

**Published in**    Cochrane database of systematic reviews, June 2012

---

**DOI**    10.1002/14651858.cd006818.pub2 [↗](#)

---

**Pubmed ID**    22696360 [↗](#)

---

**Authors**    Kenneth Tan, Nai Ming Lai

**MENDELEY READERS**

---

[?](#) | The data shown below were compiled from readership statistics for **300**



Cochrane Database of Systematic Reviews | [Review - Intervention](#)

## Telemedicine for the support of parents of high-risk newborn infants

[✉ Kenneth Tan, Nai Ming Lai](#)    Authors' declarations of interest

Version published: 13 June 2012    [Version history](#)

<https://doi.org/10.1002/14651858.cd006818.pub2> [↗](#)

[Collapse all](#)    [Expand all](#)

### Abstract

Available in [English](#) | [Español](#) | [فارسی](#) | [Français](#) | [日本語](#) | [ไทย](#)

Unlock the full review [➔](#)

[Download PDF](#)

[Cite this Review](#)

[Print](#)    [Comment](#)    [Share](#)    [Follow](#)

[Am score](#) 0

**Contents**

[119] Taylor, Dalili, Semwal, Civljak, Sheikh and Car (2017) Internet-based interventions for smoking cessation



**70**

**About this Attention Score**

In the top 5% of all research outputs scored by Altmetric

**Mentioned by**

- 4 blogs
- 3 policy sources
- 57 tweeters
- 2 Facebook pages
- 3 Wikipedia pages

**Citations**

- 243 Dimensions

**Readers on**

- 776 Mendeley

**SUMMARY**    Blogs    Policy documents    Twitter    Facebook    Wikijournal

---

**Title**    Internet-based interventions for smoking cessation

**Published in**    Cochrane database of systematic reviews, September 2017

**DOI**    10.1002/14651858.cd007078.pub5 [↗](#)

**PubMed ID**    28869775 [↗](#)

**Authors**    Gemma M. J. Taylor, Michael N Dalili, Monika Semwal, Marta Civljak, Aziz Sheikh, Josip Car

**Abstract**    Tobacco use is estimated to kill 7 million people a year. Nicotine is highly addictive, but... [\[show\]](#)

---

**TWITTER DEMOGRAPHICS** MENU

---

The data shown below were collected from the profiles of **57** tweeters who shared this research on Twitter



Cochrane Database of Systematic Reviews | [Review - Intervention](#)

### Internet-based interventions for smoking cessation

Gemma M. J. Taylor, Michael N Dalili, Monika Semwal, Marta Civljak, Aziz Sheikh, [✉ Josip Car](#) Authors' declarations of interest

Version published: 04 September 2017 [Version history](#)

<https://doi.org/10.1002/14651858.CD007078.pub5> [↗](#)

[Download PDF](#)

[Cite this Review](#)

[Print](#)
[Comment](#)
[Share](#)
[Follow](#)

[Altmetric score](#) 0 [Cited in 6 guidelines](#)

[Collapse all](#)    [Expand all](#)

[120] Thabrew, Stasiak, Hetrick, Wong, Huss and Merry (2018) E-Health interventions for anxiety and depression in children and adolescents with long-term physical conditions



**101**

**About this Attention Score**

In the top 5% of all research outputs scored by Altmetric

**Mentioned by**

- 1 blog
- 2 policy sources
- 140 tweeters
- 4 Facebook pages
- 1 video uploader

**Citations**

- 84 Dimensions

**Readers on**

- 1589 Mendeley

**SUMMARY** | Blogs | Policy documents | Twitter | Facebook | Video | Dimensions

**Title** E-Health interventions for anxiety and depression in children and adolescents with long-term physical conditions

**Published in** Cochrane database of systematic reviews, August 2018

**DOI** 10.1002/14651858.cd012489.pub2

**PubMed ID** 30110718

**Authors** Hiran Thabrew, Karolina Stasiak, Sarah E Hetrick, Stephen Wong, Jessica H Huss, Sally N Merry

**Abstract** Long-term physical conditions affect 10% to 12% of children and adolescents worldwide; these... [show]

**TWITTER DEMOGRAPHICS** | MENDELEY READERS

The data shown below were collected from the profiles of **140** tweeters who shared this research output. [Click here](#)



Cochrane Database of Systematic Reviews | [Review](#) - [Intervention](#)

## E-Health interventions for anxiety and depression in children and adolescents with long-term physical conditions

✉ [Hiran Thabrew](#), [Karolina Stasiak](#), [Sarah E Hetrick](#), [Stephen Wong](#), [Jessica H Huss](#), [Sally N Merry](#)  
Authors' declarations of interest

Version published: 15 August 2018 [Version history](#)

<https://doi.org/10.1002/14651858.CD012489.pub2>

Download PDF

Cite this Review

Print | Comment | Share | Follow

Alt score 0

Contents



[121] Treanor, McMenamin, O'Neill, Cardwell, Clarke, Cantwell and Donnelly (2016) Non-pharmacological interventions for cognitive impairment due to systemic cancer treatment



**15**

**About this Attention Score**

In the top 25% of all research outputs scored by Altmetric

**Mentioned by** MORE...

- 1 blog
- 14 tweeters

**Citations**

- 75 Dimensions

**Readers on**

- 612 Mendeley

**SUMMARY** | Blogs | Twitter | Dimensions citations

**Title** Non-pharmacological interventions for cognitive impairment due to systemic cancer treatment

**Published in** Cochrane database of systematic reviews, August 2016

**DOI** 10.1002/14651858.cd011325.pub2 [↗](#)

**Pubmed ID** 27529826 [↗](#)

**Authors** Charlene J Treanor, Una C McMenamin, Roisin F O'Neill, Chris R Cardwell, Mike J Clarke, Marie M... [\[show\]](#)

**Abstract** It is estimated that up to 75% of cancer survivors may experience cognitive impairment as a result... [\[show\]](#)

**TWITTER DEMOGRAPHICS** MENDELEY REA

The data shown below were collected from the profiles of **14** tweeters who shared this research output. [Click](#)



Cochrane Database of Systematic Reviews | [Review](#) - [Intervention](#)

## Non-pharmacological interventions for cognitive impairment due to systemic cancer treatment

✉ [Charlene J Treanor](#), [Una C McMenamin](#), [Roisin F O'Neill](#), [Chris R Cardwell](#), [Mike J Clarke](#), [Marie M Cantwell](#), [Michael Donnelly](#) [Authors' declarations of interest](#)

Version published: 16 August 2016 [Version history](#)  
<https://doi.org/10.1002/14651858.CD011325.pub2> [↗](#)

[Download PDF](#)

[Cite this Review](#)

[Print](#) [Comment](#) [Share](#) [Follow](#)

[Any score](#) 0 [Cited in 8 guidelines](#)

### Contents

[122] Treweek, Pitkethly, Cook, Fraser, Mitchell, Sullivan, Jackson, Taskila and Gardner (2018)  
Strategies to improve recruitment to randomised trials



**107**

**About this Attention Score**

In the top 5% of all research outputs scored by Altmetric

**Mentioned by**

- 2 blogs
- 153 tweeters
- 1 Facebook page

**Citations**

- 334 Dimensions

**Readers on**

- 459 Mendeley

**SUMMARY** | Blogs | Twitter | Facebook | Dimensions citations

---

**Title** Strategies to improve recruitment to randomised trials

**Published in** Cochrane database of systematic reviews, February 2018

**DOI** 10.1002/14651858.mr000013.pub6 [↗](#)

**Pubmed ID** 29468635 [↗](#)

**Authors** Shaun Treweek, Marie Pitkethly, Jonathan Cook, Cynthia Fraser, Elizabeth Mitchell, Frank Sullivan... [\[shc\]](#)

**Abstract** Recruiting participants to trials can be extremely difficult. Identifying strategies that improve... [\[show\]](#)

---

**TWITTER DEMOGRAPHICS** MENDELEY

---

The data shown below were collected from the profiles of **153** tweeters who shared this research out



Cochrane Database of Systematic Reviews | [Review - Methodology](#)

[New search](#) [Conclusions changed](#)

## Strategies to improve recruitment to randomised trials

✉ [Shaun Treweek](#), [Marie Pitkethly](#), [Jonathan Cook](#), [Cynthia Fraser](#), [Elizabeth Mitchell](#), [Frank Sullivan](#), [Catherine Jackson](#), [Tyna K Taskila](#), [Heidi Gardner](#) Authors' declarations of interest

Version published: 22 February 2018 [Version history](#)  
<https://doi.org/10.1002/14651858.MR000013.pub6> [↗](#)

[Download PDF](#)

[Cite this Review](#)

[Print](#) [Comment](#) [Share](#) [Follow](#)

[Any score](#) 0

[Collapse all](#) [Expand all](#)

**Contents**

[123] Tudor Car, Gentry, van-Velthoven and Car (2013) Telephone communication of HIV testing results for improving knowledge of HIV infection status



**2**

[About this Attention Score](#)

Average Attention Score compared to outputs of the same age

Mentioned by  
3 tweeters

Citations  
5 Dimensions

Readers on  
205 Mendeley

**SUMMARY**    Twitter    Dimensions citations

**Title** Telephone communication of HIV testing results for improving knowledge of HIV infection status

**Published in** Cochrane database of systematic reviews, January 2013

**DOI** 10.1002/14651858.cd009192.pub2 [↗](#)

**Pubmed ID** 23440835 [↗](#)

**Authors** Lorainne Tudor Car, Sarah Gentry, Michelle HMMT van-Velthoven, Josip Car

**Abstract** This is one of three Cochrane reviews that examine the role of the telephone in HIV/AIDS services... [\[show\]](#)

**TWITTER DEMOGRAPHICS**

The data shown below were collected from the profiles of 3 tweeters who shared this research output. [Click](#)



**MENDELEY RE**

Cochrane Database of Systematic Reviews | [Review - Intervention](#)

## Telephone communication of HIV testing results for improving knowledge of HIV infection status

Lorainne Tudor Car, Sarah Gentry, Michelle HMMT van-Velthoven, [✉ Josip Car](#) Authors' declarations of interest

Version published: 31 January 2013 [Version history](#)

<https://doi.org/10.1002/14651858.CD009192.pub2> [↗](#)

Unlock the full review [➔](#)

[Download PDF](#)

[Cite this Review](#)

[Print](#)
[Comment](#)
[Share](#)
[Follow](#)

[Am score](#) 0

[Collapse all](#) [Expand all](#)

[124] Välimäki, Hätönen, Lahti, Kurki, Hottinen, Metsäranta, Riihimäki and Adams (2014) Virtual reality for treatment compliance for people with serious mental illness



**6**

**About this Attention Score**

Good Attention Score compared to outputs of the same age (76th percentile)

**Mentioned by**  
9 tweeters

**Citations**  
29 Dimensions

**Readers on**  
427 Mendeley

**SUMMARY**    Twitter    Dimensions citations

---

**Title**    Virtual reality for treatment compliance for people with serious mental illness

**Published in**    Cochrane database of systematic reviews, October 2014

**DOI**    10.1002/14651858.cd009928.pub2 [↗](#)

**Pubmed ID**    25300174 [↗](#)

**Authors**    Maritta Välimäki, Heli M Hätönen, Mari E Lahti, Marjo Kurki, Anja Hottinen, Kiki Metsäranta, Tanja... [\[show\]](#)

**Abstract**    Virtual reality (VR) is computerised real-time technology, which can be used an alternative... [\[show\]](#)

---

**TWITTER DEMOGRAPHICS** MENDELEY REA

---

The data shown below were collected from the profiles of **9** tweeters who shared this research output. [Click](#)



Cochrane Database of Systematic Reviews | Review - Intervention

## Virtual reality for treatment compliance for people with serious mental illness

✉ Maritta Välimäki, Heli M Hätönen, Mari E Lahti, Marjo Kurki, Anja Hottinen, Kiki Metsäranta, Tanja Riihimäki, Clive E Adams    Authors' declarations of interest  
 Version published: 08 October 2014    Version history  
<https://doi.org/10.1002/14651858.CD009928.pub2> [↗](#)

Download PDF ▾

Cite this Review

Print    Comment    Share    Follow

Am score 0    Cited in 2 guidelines

### Contents

# [125] van-Velthoven, Tudor Car, Gentry and Car (2013) Telephone delivered interventions for preventing HIV infection in HIV-negative persons



Mentioned by  
**1** tweeter

Citations  
**15** Dimensions

Readers on  
**602** Mendeley

**SUMMARY** | Twitter | Dimensions citations

**Title** Telephone delivered interventions for preventing HIV infection in HIV-negative persons

**Published in** Cochrane database of systematic reviews, May 2013

**DOI** 10.1002/14651858.cd009190.pub2 [↗](#)

**Pubmed ID** 23728688 [↗](#)

**Authors** Michelle HMMT van-Velthoven, Lorainne Tudor Car, Sarah Gentry, Josip Car

**Abstract** This is one of the three Cochrane reviews that examine the role of the telephone in HIV/AIDS... [\[show\]](#)

**TWITTER DEMOGRAPHICS** | MENDELEY REA

The data shown below were collected from the profile of **1** tweeter who shared this research output. [Click he](#)



Cochrane Database of Systematic Reviews | [Review - Intervention](#)

## Telephone delivered interventions for preventing HIV infection in HIV-negative persons

Michelle HMMT van-Velthoven, Lorainne Tudor Car, Sarah Gentry, [✉ Josip Car](#) Authors' declarations of interest

Version published: 31 May 2013 [Version history](#)

<https://doi.org/10.1002/14651858.CD009190.pub2> [↗](#)

[Download PDF](#)

[Cite this Review](#)

[Print](#) [Comment](#) [Share](#) [Follow](#)

[Alt score](#) 0

[126] Vaona, Banzi, Kwag, Rigon, Cereda, Pecoraro, Tramacere and Moja (2018) E-learning for health professionals



**75**

About this Attention Score

In the top 5% of all research outputs scored by Altmetric

Mentioned by

- 2 news outlets
- 98 tweeters

Citations

- 248 Dimensions

Readers on

- 712 Mendeley

**SUMMARY** News Twitter Dimensions citations

**Title** E-learning for health professionals

**Published in** Cochrane database of systematic reviews, January 2018

**DOI** 10.1002/14651858.cd011736.pub2

**Pubmed ID** 29355907

**Authors** Alberto Vaona, Rita Banzi, Koren H Kwag, Giulio Rigon, Danilo Cereda, Valentina Pecoraro, Irene... [show]

**Abstract** The use of e-learning, defined as any educational intervention mediated electronically via the... [show]

**TWITTER DEMOGRAPHICS** MENDELEY REA

The data shown below were collected from the profiles of **98** tweeters who shared this research output. [Click](#)



Cochrane Database of Systematic Reviews | [Review - Intervention](#)

## E-learning for health professionals

✉ [Alberto Vaona](#), [Rita Banzi](#), [Koren H Kwag](#), [Giulio Rigon](#), [Danilo Cereda](#), [Valentina Pecoraro](#), [Irene Tramacere](#), [Lorenzo Moja](#) Authors' declarations of interest

Version published: 22 January 2018 [Version history](#)

<https://doi.org/10.1002/14651858.CD011736.pub2>

Download PDF

Cite this Review

Print Comment Share Follow

Alt score 0

[127] Vasudevan, Glenton, Henschke, Maayan, Eyers, Fønhus, Tamrat, Mehl and Lewin (2021) Birth and death notification via mobile devices: a mixed methods systematic review



**17**

**About this Attention Score**

In the top 25% of all research outputs scored by Altmetric

**Mentioned by**  
30 tweeters  
2 Facebook pages

**Citations**  
9 Dimensions

**Readers on**  
140 Mendeley

**SUMMARY** | Twitter | Facebook | Dimensions citations

**Title** Birth and death notification via mobile devices: a mixed methods systematic review

**Published in** Cochrane database of systematic reviews, July 2021

**DOI** 10.1002/14651858.cd012909.pub2

**Pubmed ID** 34271590

**Authors** Lavanya Vasudevan, Claire Glenton, Nicholas Henschke, Nicola Maayan, John Eyers, Marita S Fønhus... [show]

**TWITTER DEMOGRAPHICS** | MENDELEY READ

The data shown below were collected from the profiles of 30 tweeters who shared this research output. [Click here](#)



Cochrane Database of Systematic Reviews | [Review - Intervention](#)

## Birth and death notification via mobile devices: a mixed methods systematic review

✉ Lavanya Vasudevan, Claire Glenton, Nicholas Henschke, Nicola Maayan, John Eyers, Marita S Fønhus, Tigest Tamrat, Garrett L Mehl, Simon Lewin Authors' declarations of interest

Version published: 16 July 2021 [Version history](#)

<https://doi.org/10.1002/14651858.CD012909.pub2>

Download PDF

Cite this Review

Print | Comment | Share | Follow

Am score 0

Contents

[128] Verbeek, Rajamaki, Ijaz, Sauni, Toomey, Blackwood, Tikka, Ruotsalainen and Kilinc Balci (2020)  
Personal protective equipment for preventing highly infectious diseases due to exposure to contaminated body fluids in healthcare staff



**78**

About this Attention Score

In the top 5% of all research outputs scored by Altmetric

Mentioned by

- 2 news outlets
- 1 blog
- 80 tweeters
- 6 Facebook pages
- 11 Wikipedia pages

Citations

- 108 Dimensions

Readers on

- 886 Mendeley

**SUMMARY** News Blogs Twitter Facebook Wikipedia Dimensions citations

**Title** Personal protective equipment for preventing highly infectious diseases due to exposure to contaminated body fluids in healthcare staff

**Published in** Cochrane database of systematic reviews, May 2020

**DOI** 10.1002/14651858.cd011621.pub5

**Pubmed ID** 32412096

**Authors** Jos H Verbeek, Blair Rajamaki, Sharea Ijaz, Riitta Sauni, Elaine Toomey, Bronagh Blackwood... [show]

**TWITTER DEMOGRAPHICS** MENDELEY READERS

The data shown below were collected from the profiles of **80** tweeters who shared this research output. [Click here to find out more](#)



Cochrane Database of Systematic Reviews | [Review - Intervention](#) **Conclusions changed**

## Personal protective equipment for preventing highly infectious diseases due to exposure to contaminated body fluids in healthcare staff

✉ Jos H Verbeek, Blair Rajamaki, Sharea Ijaz, Riitta Sauni, Elaine Toomey, Bronagh Blackwood, Christina Tikka, Jani H Ruotsalainen, F Selcen Kilinc Balci Authors' declarations of interest

Version published: 15 May 2020 [Version history](#)  
<https://doi.org/10.1002/14651858.CD011621.pub5>

Download PDF

Cite this Review

Print Comment Share Follow

Altmetric SCORE 0 Cited in 3 guidelines

Contents



[129] Vijayaraghavan, Elser, Frazer, Lindson and Apollonio (2020) Interventions to reduce tobacco use in people experiencing homelessness



**26**

About this Attention Score

In the top 25% of all research outputs scored by Altmetric

MORE...

Mentioned by

- 1 news outlet
- 30 tweeters
- 1 Facebook page

Citations

- 25 Dimensions

Readers on

- 212 Mendeley

**SUMMARY** News Twitter Facebook Dimensions citations

**Title** Interventions to reduce tobacco use in people experiencing homelessness

**Published in** Cochrane database of systematic reviews, December 2020

**DOI** 10.1002/14651858.cd013413.pub2

**Pubmed ID** 33284989

**Authors** Maya Vijayaraghavan, Holly Elser, Kate Frazer, Nicola Lindson, Dorie Apollonio

**TWITTER DEMOGRAPHICS** MENDEL

The data shown below were collected from the profiles of 30 tweeters who shared this research output



Cochrane Database of Systematic Reviews | Review - Intervention

## Interventions to reduce tobacco use in people experiencing homelessness

✉ Maya Vijayaraghavan, Holly Elser, Kate Frazer, Nicola Lindson, Dorie Apollonio Authors' declarations of interest

Version published: 03 December 2020 Version history

<https://doi.org/10.1002/14651858.CD013413.pub2>

Download PDF

Cite this Review

Print Comment Share Follow

Altmetric score 0

[130] Vodopivec-Jamsek, de Jongh, Gurol-Urganci, Atun and Car (2012) Mobile phone messaging for preventive health care



**33**

**About this Attention Score**

In the top 5% of all research outputs scored by Altmetric

**Mentioned by**

- 1 blog
- 4 policy sources
- 22 tweeters
- 1 Google+ user

**Citations**

- 263 Dimensions

**Readers on**

- 1412 Mendeley
- 2 CiteULike

**SUMMARY**

Blogs

Policy documents

Twitter

Google+

Dimensions

|                     |                                                                                                                             |
|---------------------|-----------------------------------------------------------------------------------------------------------------------------|
| <b>Title</b>        | Mobile phone messaging for preventive health care                                                                           |
| <b>Published in</b> | Cochrane database of systematic reviews, December 2012                                                                      |
| <b>DOI</b>          | 10.1002/14651858.cd007457.pub2 <a href="#">↗</a>                                                                            |
| <b>PubMed ID</b>    | 23235643 <a href="#">↗</a>                                                                                                  |
| <b>Authors</b>      | Vlasta Vodopivec-Jamsek, Thyra de Jongh, Ipek Gurol-Urganci, Rifat Atun, Josip Car                                          |
| <b>Abstract</b>     | Preventive health care promotes health and prevents disease or injuries by addressing factors that... <a href="#">[SHO]</a> |

**TWITTER DEMOGRAPHICS**

**MENDELEY**

The data shown below were collected from the profiles of **22** tweeters who shared this research output.



Cochrane Database of Systematic Reviews | [Review - Intervention](#)

## Mobile phone messaging for preventive health care

✉ [Vlasta Vodopivec-Jamsek, Thyra de Jongh, Ipek Gurol-Urganci, Rifat Atun, Josip Car](#)  
 Version published: 12 December 2012 [Version history](#)  
<https://doi.org/10.1002/14651858.CD007457.pub2> [↗](#)

**Abstract**

---

Unlock the full review [>](#)

Download PDF [▼](#)

Cite this Review

Print
 Comment
 Share
 Follow

**0** Cited in 1 guideline

[Collapse all](#) [Expand all](#)

[131] Wei, Pappas, Car, Sheikh and Majeed (2011) Computer-assisted versus oral-and-written dietary history taking for diabetes mellitus



**4**

**About this Attention Score**

Good Attention Score compared to outputs of the same age (71st percentile)

**Mentioned by** MORE...

- 1 tweeter
- 2 Wikipedia pages

**Citations**

- 9 Dimensions

**Readers on**

- 224 Mendeley

| SUMMARY                                                                                                                                 | Twitter | Wikipedia | Dimensions citations |
|-----------------------------------------------------------------------------------------------------------------------------------------|---------|-----------|----------------------|
| <b>Title</b> Computer-assisted versus oral-and-written dietary history taking for diabetes mellitus                                     |         |           |                      |
| <b>Published in</b> Cochrane database of systematic reviews, December 2011                                                              |         |           |                      |
| <b>DOI</b> 10.1002/14651858.cd008488.pub2 <a href="#">↗</a>                                                                             |         |           |                      |
| <b>Pubmed ID</b> 22161430 <a href="#">↗</a>                                                                                             |         |           |                      |
| <b>Authors</b> Igor Wei, Yannis Pappas, Josip Car, Aziz Sheikh, Azeem Majeed                                                            |         |           |                      |
| <b>Abstract</b> Diabetes is a chronic illness characterised by insulin resistance or deficiency, resulting in... <a href="#">[show]</a> |         |           |                      |

**TWITTER DEMOGRAPHICS**

---

The data shown below were collected from the profile of 1 tweeter who shared this research output. [Click here to find c](#)



**MENDELEY READERS**

Cochrane Database of Systematic Reviews | [Review - Intervention](#)

## Computer-assisted versus oral-and-written dietary history taking for diabetes mellitus

Igor Wei, Yannis Pappas, [✉ Josip Car](#), Aziz Sheikh, Azeem Majeed Authors' declarations of interest

Version published: 07 December 2011 [Version history](#)

<https://doi.org/10.1002/14651858.CD008488.pub2> [↗](#)

[Download PDF](#) ▼

[Cite this Review](#)

[Print](#)

[Comment](#)

[Share](#)

[Follow](#)

score 0

[132] Whitford, Wallis, Dowswell, West and Renfrew (2017) Breastfeeding education and support for women with twins or higher order multiples



**28**

About this Attention Score

In the top 25% of all research outputs scored by Altmetric

Mentioned by

- 2 blogs
- 23 tweeters
- 3 Facebook pages

Citations

- 39 Dimensions

Readers on

- 475 Mendeley

**SUMMARY** Blogs Twitter Facebook Dimensions citations

**Title** Breastfeeding education and support for women with twins or higher order multiples

**Published in** Cochrane database of systematic reviews, February 2017

**DOI** 10.1002/14651858.cd012003.pub2

**Pubmed ID** 28244065

**Authors** Heather M Whitford, Selina K Wallis, Therese Dowswell, Helen M West, Mary J Renfrew

**Abstract** There are rising rates of multiple births worldwide with associated higher rates of complications... [\[show\]](#)

**TWITTER DEMOGRAPHICS** MENDELEY READERS

The data shown below were collected from the profiles of 23 tweeters who shared this research output. [Click here to find.](#)



Cochrane Database of Systematic Reviews | [Review - Intervention](#)

## Breastfeeding education and support for women with twins or higher order multiples

✉ Heather M Whitford, Selina K Wallis, Therese Dowswell, Helen M West, Mary J Renfrew Authors' declarations of interest

Version published: 28 February 2017 [Version history](#)

<https://doi.org/10.1002/14651858.CD012003.pub2>

Download PDF

Cite this Review

Print Comment Share Follow

Alt score 0 Cited in 3 guidelines

[133] Whittaker, McRobbie, Bullen, Rodgers, Gu and Dobson (2019) Mobile phone text messaging and app-based interventions for smoking cessation



146

**About this Attention Score**

In the top 5% of all research outputs scored by Altmetric

MORE...

**Mentioned by**

- 4 news outlets
- 5 blogs
- 3 policy sources
- 136 tweeters
- 4 Facebook pages

**Citations**

- 255 Dimensions

**Readers on**

- 358 Mendeley

**SUMMARY** | News | Blogs | Policy documents | Twitter | Facebook

---

**Title** Mobile phone text messaging and app-based interventions for smoking cessation

**Published in** Cochrane database of systematic reviews, October 2019

**DOI** 10.1002/14651858.cd006611.pub5 [↗](#)

**Pubmed ID** 31638271 [↗](#)

**Authors** Robyn Whittaker, Hayden McRobbie, Chris Bullen, Anthony Rodgers, Yulong Gu, Rosie Dobson

---

**TWITTER DEMOGRAPHICS** MEN

---

The data shown below were collected from the profiles of **136** tweeters who shared this research



Cochrane Database of Systematic Reviews | [Review - Intervention](#)

## Mobile phone text messaging and app-based interventions for smoking cessation

[✉](#) Robyn Whittaker, Hayden McRobbie, Chris Bullen, Anthony Rodgers, Yulong Gu, Rosie Dobson  
 Authors' declarations of interest

Version published: 22 October 2019 [Version history](#)  
<https://doi.org/10.1002/14651858.CD006611.pub5> [↗](#)

[New search](#)

[Download PDF](#)

[Cite this Review](#)

[Print](#)
[Comment](#)
[Share](#)
[Follow](#)

score 0 [Cited in 3 guidelines](#)

**Contents**

[134] Wieland, Falzon, Sciamanna, Trudeau, Brodney Folse, Schwartz and Davidson (2012) Interactive computer-based interventions for weight loss or weight maintenance in overweight or obese people



**43**

[About this Attention Score](#)

In the top 5% of all research outputs scored by Altmetric

Mentioned by

- 1 blog
- 1 policy source
- 46 tweeters
- 7 Facebook pages

Citations

- 188 Dimensions

Readers on

- 516 Mendeley

**SUMMARY** | Blogs | Policy documents | Twitter | Facebook | Dimensions citations

**Title** Interactive computer-based interventions for weight loss or weight maintenance in overweight or obese people

**Published in** Cochrane database of systematic reviews, August 2012

**DOI** 10.1002/14651858.cd007675.pub2 [↗](#)

**Pubmed ID** 22895964 [↗](#)

**Authors** L. Susan Wieland, Louise Falzon, Chris N Sciamanna, Kimberlee J Trudeau, Suzanne Brodney Folse... [\[show\]](#)

**Abstract** The World Health Organization (WHO) estimates that the number of obese or overweight individuals... [\[show\]](#)

---

**TWITTER DEMOGRAPHICS** MENDELEY READERS

The data shown below were collected from the profiles of **46** tweeters who shared this research output. [Click here to find out more](#)



Cochrane Database of Systematic Reviews | [Review - Intervention](#)

## Interactive computer-based interventions for weight loss or weight maintenance in overweight or obese people

L. Susan Wieland, [✉ Louise Falzon](#), Chris N Sciamanna, Kimberlee J Trudeau, Suzanne Brodney Folse, Joseph E Schwartz, Karina W Davidson Authors' declarations of interest

Version published: 15 August 2012 [Version history](#)

<https://doi.org/10.1002/14651858.CD007675.pub2> [↗](#)

Unlock the full review [➔](#)

[Download PDF](#)

[Cite this Review](#)

[Print](#)
[Comment](#)
[Share](#)
[Follow](#)

**score** 0 Cited in 3 guidelines

[Collapse all](#) [Expand all](#)

[135] Wilson, Willis, Hendrikz, Le Brocque and Bellamy (2010) Speed cameras for the prevention of road traffic injuries and deaths

# Speed cameras for the prevention of road traffic injuries and deaths

Overview of attention for article published in this source, November 2010



**403**

Mentioned by

- 34 news outlets
- 1 blog
- 3 policy sources
- 144 tweeters
- 2 Facebook pages
- 1 Wikipedia page
- 1 video uploader

Citations

- 43 Dimensions

Readers on

- 258 Mendeley

**SUMMARY** News Blogs Policy documents Twitter Facebook Wikipedia

**Title** Speed cameras for the prevention of road traffic injuries and deaths

**Published by** John Wiley & Sons, Ltd, November 2010

**DOI** 10.1002/14651858.cd004607.pub4

**Pubmed ID** 21069682

**Authors** Wilson, Cecilia, Willis, Charlene, Hendrikz, Joan K, Le Brocque, Robyne, Bellamy, Nicholas

**Abstract** It is estimated that by 2020, road traffic crashes will have moved from ninth to third in the... [show]

**TWITTER DEMOGRAPHICS**

The data shown below were collected from the profiles of 144 tweeters who shared this research output. [Click here to find](#)



Cochrane Database of Systematic Reviews | [Review - Intervention](#)

## Speed cameras for the prevention of road traffic injuries and deaths

✉ Cecilia Wilson, Charlene Willis, Joan K Hendrikz, Robyne Le Brocque, Nicholas Bellamy [Authors' declarations of interest](#)

Version published: 10 November 2010 [Version history](#)

<https://doi.org/10.1002/14651858.CD004607.pub4>

[Collapse all](#) [Expand all](#)

### Abstract

[Unlock the full review](#)

[Download PDF](#)

[Cite this Review](#)

[Print](#) [Comment](#) [Share](#) [Follow](#)

[Alt score](#) 0

[136] Wong, Smith and Kansra (2023) Digital technology for early identification of exacerbations in people with cystic fibrosis



**4**

**About this Attention Score**

Good Attention Score compared to outputs of the same age (68th percentile)

Mentioned by

5 tweeters

**SUMMARY** | Twitter

**Title** Digital technology for early identification of exacerbations in people with cystic fibrosis

**Published in** Cochrane database of systematic reviews, April 2023

**DOI** 10.1002/14651858.cd014606.pub2 [↗](#)

**Pubmed ID** 37057835 [↗](#)

**Authors** Chu-Hai Wong, Sherie Smith, Sonal Kansra

**TWITTER DEMOGRAPHICS**

The data shown below were collected from the profiles of **5** tweeters who shared this research



Cochrane Database of Systematic Reviews | [Review - Intervention](#)

## Digital technology for early identification of exacerbations in people with cystic fibrosis

Chu-Hai Wong, Sherie Smith, [✉ Sonal Kansra](#) Authors' declarations of interest

Version published: 14 April 2023 [Version history](#)

<https://doi.org/10.1002/14651858.CD014606.pub2> [↗](#)

**Abstract**

Unlock the full review [➔](#)

Download PDF [⌵](#)

[↻](#) Cite this Review

[🖨](#) Print [@](#) Comment [➦](#) Share [+](#) Follow

[Collapse all](#) [Expand all](#)

 score 0



[137] Xyrichis, Iliopoulou, Mackintosh, Bench, Terblanche, Philippou and Sandall (2021) Healthcare stakeholders' perceptions and experiences of factors affecting the implementation of critical care telemedicine (CCT): qualitative evidence synthesis



**44**

**About this Attention Score**

In the top 5% of all research outputs scored by Altmetric

**Mentioned by**

- 1 blog
- 64 tweeters
- 3 Facebook pages
- 1 video uploader

**Citations**

- 19 Dimensions

**Readers on**

- 283 Mendeley

| SUMMARY             | Blogs                                                                                                                  | Twitter | Facebook | Video | Dimensions citations |
|---------------------|------------------------------------------------------------------------------------------------------------------------|---------|----------|-------|----------------------|
| <b>Title</b>        | Healthcare stakeholders' perceptions and experiences of factors affecting the implementation of critical care          |         |          |       |                      |
| <b>Published in</b> | Cochrane database of systematic reviews, February 2021                                                                 |         |          |       |                      |
| <b>DOI</b>          | 10.1002/14651858.cd012876.pub2 <a href="#">↗</a>                                                                       |         |          |       |                      |
| <b>PubMed ID</b>    | 33599282 <a href="#">↗</a>                                                                                             |         |          |       |                      |
| <b>Authors</b>      | Andreas Xyrichis, Katerina Iliopoulou, Nicola J Mackintosh, Suzanne Bench, Marius Terblanche... <a href="#">[show]</a> |         |          |       |                      |

**TWITTER DEMOGRAPHICS** MENDELEY

---

The data shown below were collected from the profiles of **64** tweeters who shared this research output. [\[show\]](#)



Cochrane Database of Systematic Reviews | [Review - Qualitative](#)

## Healthcare stakeholders' perceptions and experiences of factors affecting the implementation of critical care telemedicine (CCT): qualitative evidence synthesis

✉ [Andreas Xyrichis](#), [Katerina Iliopoulou](#), [Nicola J Mackintosh](#), [Suzanne Bench](#), [Marius Terblanche](#), [Julia Philippou](#), [Jane Sandall](#) Authors' declarations of interest

Version published: 18 February 2021 Version history

<https://doi.org/10.1002/14651858.cd012876.pub2>

Download PDF ▼

[↻](#) Cite this Review

Print

Comment

Share

Follow

**score** 0

**Contents**

[138] Young and Hopewell (2011) Methods for obtaining unpublished data



**9**

**About this Attention Score**

In the top 25% of all research outputs scored by Altmetric

**Mentioned by** [MORE...](#)

- 16 tweeters
- 1 Facebook page
- 1 Google+ user

**Citations**

- 87 Dimensions

**Readers on**

- 105 Mendeley

**SUMMARY** | [Twitter](#) | [Facebook](#) | [Google+](#) | [Dimensions citations](#)

**Title** Methods for obtaining unpublished data

**Published in** Cochrane database of systematic reviews, November 2011

**DOI** 10.1002/14651858.mr000027.pub2 [↗](#)

**Pubmed ID** 22071866 [↗](#)

**Authors** Taryn Young, Sally Hopewell

**Abstract** In order to minimise publication bias, authors of systematic reviews often spend considerable time...

**TWITTER DEMOGRAPHICS** | [MENTIONS](#)

The data shown below were collected from the profiles of **16** tweeters who shared this research on



Cochrane Database of Systematic Reviews | [Review - Methodology](#)

## Methods for obtaining unpublished data

 [Taryn Young, Sally Hopewell](#) Authors' declarations of interest  
Version published: 09 November 2011 [Version history](#)  
<https://doi.org/10.1002/14651858.MR000027.pub2> [↗](#)

[Collapse all](#) [Expand all](#)

### Abstract

**Unlock the full review** [▶](#)

[Download PDF](#)

[Cite this Review](#)

[Print](#) [Comment](#) [Share](#) [Follow](#)

 **score** 0

1. Aali, G., T. Kariotis, and F. Shokraneh, *Avatar Therapy for people with schizophrenia or related disorders*. Cochrane Database of Systematic Reviews, 2020(5) DOI: 10.1002/14651858.CD011898.pub2.
2. Adler, A.J., et al., *Mobile phone text messaging to improve medication adherence in secondary prevention of cardiovascular disease*. Cochrane Database of Systematic Reviews, 2017(4) DOI: 10.1002/14651858.CD011851.pub2.
3. Agarwal, S., et al., *Tracking health commodity inventory and notifying stock levels via mobile devices: a mixed methods systematic review*. Cochrane Database of Systematic Reviews, 2020(10) DOI: 10.1002/14651858.CD012907.pub2.
4. Agarwal, S., et al., *Decision-support tools via mobile devices to improve quality of care in primary healthcare settings*. Cochrane Database of Systematic Reviews, 2021(7) DOI: 10.1002/14651858.CD012944.pub2.
5. Allida, S., et al., *mHealth education interventions in heart failure*. Cochrane Database of Systematic Reviews, 2020(7) DOI: 10.1002/14651858.CD011845.pub2.
6. Ames, H.M.R., et al., *Clients' perceptions and experiences of targeted digital communication accessible via mobile devices for reproductive, maternal, newborn, child, and adolescent health: a qualitative evidence synthesis*. Cochrane Database of Systematic Reviews, 2019(10) DOI: 10.1002/14651858.CD013447.
7. Ammenwerth, E., et al., *Adult patient access to electronic health records*. Cochrane Database of Systematic Reviews, 2021(2) DOI: 10.1002/14651858.CD012707.pub2.
8. Anglemeyer, A., et al., *Digital contact tracing technologies in epidemics: a rapid review*. Cochrane Database of Systematic Reviews, 2020(8) DOI: 10.1002/14651858.CD013699.
9. Archambault, P.M., et al., *Collaborative writing applications in healthcare: effects on professional practice and healthcare outcomes*. Cochrane Database of Systematic Reviews, 2017(5) DOI: 10.1002/14651858.CD011388.pub2.
10. Arditi, C., M. Rège-Walther, P. Durieux, and B. Burnand, *Computer-generated reminders delivered on paper to healthcare professionals: effects on professional practice and healthcare outcomes*. Cochrane Database of Systematic Reviews, 2017(7) DOI: 10.1002/14651858.CD001175.pub4.
11. Atherton, H., P. Sawmynaden, B. Meyer, and J. Car, *Email for the coordination of healthcare appointments and attendance reminders*. Cochrane Database of Systematic Reviews, 2012(8) DOI: 10.1002/14651858.CD007981.pub2.
12. Atherton, H., et al., *Email for clinical communication between patients/caregivers and healthcare professionals*. Cochrane Database of Systematic Reviews, 2012(11) DOI: 10.1002/14651858.CD007978.pub2.
13. Badawy, S.M., K. Morrone, A. Thompson, and T.M. Palermo, *Computer and mobile technology interventions to promote medication adherence and disease management in people with thalassemia*. Cochrane Database of Systematic Reviews, 2019(6) DOI: 10.1002/14651858.CD012900.pub2.
14. Bahar-Fuchs, A., et al., *Cognitive training for people with mild to moderate dementia*. Cochrane Database of Systematic Reviews, 2019(3) DOI: 10.1002/14651858.CD013069.pub2.
15. Bailey, J.V., et al., *Interactive computer-based interventions for sexual health promotion*. Cochrane Database of Systematic Reviews, 2010(9) DOI: 10.1002/14651858.CD006483.pub2.
16. Barth, J., T. Jacob, I. Daha, and J.A. Critchley, *Psychosocial interventions for smoking cessation in patients with coronary heart disease*. Cochrane Database of Systematic Reviews, 2015(7) DOI: 10.1002/14651858.CD006886.pub2.
17. Beishon, L.C., et al., *Diagnostic test accuracy of remote, multidomain cognitive assessment (telephone and video call) for dementia*. Cochrane Database of Systematic Reviews, 2022(4) DOI: 10.1002/14651858.CD013724.pub2.
18. Bittner, A.K., P.D. Yoshinaga, T. Rittiphairoj, and T. Li, *Telerehabilitation for people with low vision*. Cochrane Database of Systematic Reviews, 2023(1) DOI: 10.1002/14651858.CD011019.pub4.

19. Bunn, F., G. Byrne, and S. Kendall, *Telephone consultation and triage: effects on health care use and patient satisfaction*. Cochrane Database of Systematic Reviews, 2004(3) DOI: 10.1002/14651858.CD004180.pub2.
20. Boyle, R., L. Solberg, and M. Fiore, *Use of electronic health records to support smoking cessation*. Cochrane Database of Systematic Reviews, 2014(12) DOI: 10.1002/14651858.CD008743.pub3.
21. Burge, A.T., N.S. Cox, M.J. Abramson, and A.E. Holland, *Interventions for promoting physical activity in people with chronic obstructive pulmonary disease (COPD)*. Cochrane Database of Systematic Reviews, 2020(4) DOI: 10.1002/14651858.CD012626.pub2.
22. Car, J., et al., *Interventions for enhancing consumers' online health literacy*. Cochrane Database of Systematic Reviews, 2011(6) DOI: 10.1002/14651858.CD007092.pub2.
23. Chan, A., et al., *Digital interventions to improve adherence to maintenance medication in asthma*. Cochrane Database of Systematic Reviews, 2022(6) DOI: 10.1002/14651858.CD013030.pub2.
24. Chuchu, N., et al., *Teledermatology for diagnosing skin cancer in adults*. Cochrane Database of Systematic Reviews, 2018(12) DOI: 10.1002/14651858.CD013193.
25. Chuchu, N., et al., *Smartphone applications for triaging adults with skin lesions that are suspicious for melanoma*. Cochrane Database of Systematic Reviews, 2018(12) DOI: 10.1002/14651858.CD013192.
26. Corry, M., et al., *Telephone interventions, delivered by healthcare professionals, for providing education and psychosocial support for informal caregivers of adults with diagnosed illnesses*. Cochrane Database of Systematic Reviews, 2019(5) DOI: 10.1002/14651858.CD012533.pub2.
27. Cox, N.S., et al., *Telerehabilitation for chronic respiratory disease*. Cochrane Database of Systematic Reviews, 2021(1) DOI: 10.1002/14651858.CD013040.pub2.
28. Dale, J., I.O. Caramlau, A. Lindenmeyer, and S.M. Williams, *Peer support telephone calls for improving health*. Cochrane Database of Systematic Reviews, 2008(4) DOI: 10.1002/14651858.CD006903.pub2.
29. Datta, S.S., R. Daruvala, and A. Kumar, *Psychological interventions for psychosis in adolescents*. Cochrane Database of Systematic Reviews, 2020(7) DOI: 10.1002/14651858.CD009533.pub2.
30. de Jongh, T., et al., *Mobile phone messaging for facilitating self-management of long-term illnesses*. Cochrane Database of Systematic Reviews, 2012(12) DOI: 10.1002/14651858.CD007459.pub2.
31. Dennett, E.J., et al., *Tailored or adapted interventions for adults with chronic obstructive pulmonary disease and at least one other long-term condition: a mixed methods review*. Cochrane Database of Systematic Reviews, 2021(7) DOI: 10.1002/14651858.CD013384.pub2.
32. Devi, R., et al., *Internet-based interventions for the secondary prevention of coronary heart disease*. Cochrane Database of Systematic Reviews, 2015(12) DOI: 10.1002/14651858.CD009386.pub2.
33. Eccleston, C., et al., *Psychological therapies (Internet-delivered) for the management of chronic pain in adults*. Cochrane Database of Systematic Reviews, 2014(2) DOI: 10.1002/14651858.CD010152.pub2.
34. Eccleston, C., et al., *Interventions for the reduction of prescribed opioid use in chronic non-cancer pain*. Cochrane Database of Systematic Reviews, 2017(11) DOI: 10.1002/14651858.CD010323.pub3.
35. Fiander, M., et al., *Interventions to increase the use of electronic health information by healthcare practitioners to improve clinical practice and patient outcomes*. Cochrane Database of Systematic Reviews, 2015(3) DOI: 10.1002/14651858.CD004749.pub3.
36. Fisher, E., et al., *Psychological therapies (remotely delivered) for the management of chronic and recurrent pain in children and adolescents*. Cochrane Database of Systematic Reviews, 2019(4) DOI: 10.1002/14651858.CD011118.pub3.

37. Fleming, P.S., et al., *Non-pharmacological interventions for alleviating pain during orthodontic treatment*. Cochrane Database of Systematic Reviews, 2016(12) DOI: 10.1002/14651858.CD010263.pub2.
38. Flodgren, G., et al., *Interactive telemedicine: effects on professional practice and health care outcomes*. Cochrane Database of Systematic Reviews, 2015(9) DOI: 10.1002/14651858.CD002098.pub2.
39. Foster, C., J. Richards, M. Thorogood, and M. Hillsdon, *Remote and web 2.0 interventions for promoting physical activity*. Cochrane Database of Systematic Reviews, 2013(9) DOI: 10.1002/14651858.CD010395.pub2.
40. Galaal, K., et al., *Interventions for reducing anxiety in women undergoing colposcopy*. Cochrane Database of Systematic Reviews, 2011(12) DOI: 10.1002/14651858.CD006013.pub3.
41. Gates, N.J., et al., *Computerised cognitive training for maintaining cognitive function in cognitively healthy people in midlife*. Cochrane Database of Systematic Reviews, 2019(3) DOI: 10.1002/14651858.CD012278.pub2.
42. Gates, N.J., et al., *Computerised cognitive training for 12 or more weeks for maintaining cognitive function in cognitively healthy people in late life*. Cochrane Database of Systematic Reviews, 2020(2) DOI: 10.1002/14651858.CD012277.pub3.
43. Gates, N.J., et al., *Computerised cognitive training for preventing dementia in people with mild cognitive impairment*. Cochrane Database of Systematic Reviews, 2019(3) DOI: 10.1002/14651858.CD012279.pub2.
44. Gavine, A., et al., *Support for healthy breastfeeding mothers with healthy term babies*. Cochrane Database of Systematic Reviews, 2022(10) DOI: 10.1002/14651858.CD001141.pub6.
45. Gentry, S., M. van-Velthoven, L. Tudor Car, and J. Car, *Telephone delivered interventions for reducing morbidity and mortality in people with HIV infection*. Cochrane Database of Systematic Reviews, 2013(5) DOI: 10.1002/14651858.CD009189.pub2.
46. Gillaizeau, F., et al., *Computerized advice on drug dosage to improve prescribing practice*. Cochrane Database of Systematic Reviews, 2013(11) DOI: 10.1002/14651858.CD002894.pub3.
47. Gonçalves-Bradley, D.C., et al., *Mobile technologies to support healthcare provider to healthcare provider communication and management of care*. Cochrane Database of Systematic Reviews, 2020(8) DOI: 10.1002/14651858.CD012927.pub2.
48. González-Fraile, E., et al., *Remotely delivered information, training and support for informal caregivers of people with dementia*. Cochrane Database of Systematic Reviews, 2021(1) DOI: 10.1002/14651858.CD006440.pub3.
49. Gordon, M., et al., *Remote care through telehealth for people with inflammatory bowel disease*. Cochrane Database of Systematic Reviews, 2023(5) DOI: 10.1002/14651858.CD014821.pub2.
50. Goyder, C., et al., *Email for clinical communication between healthcare professionals*. Cochrane Database of Systematic Reviews, 2015(2) DOI: 10.1002/14651858.CD007979.pub3.
51. Gurol-Urganci, I., et al., *Mobile phone messaging reminders for attendance at healthcare appointments*. Cochrane Database of Systematic Reviews, 2013(12) DOI: 10.1002/14651858.CD007458.pub3.
52. Gurol-Urganci, I., et al., *Mobile phone messaging for communicating results of medical investigations*. Cochrane Database of Systematic Reviews, 2012(6) DOI: 10.1002/14651858.CD007456.pub2.
53. Gurusamy, K.S., J. Vaughan, and B.R. Davidson, *Formal education of patients about to undergo laparoscopic cholecystectomy*. Cochrane Database of Systematic Reviews, 2014(2) DOI: 10.1002/14651858.CD009933.pub2.
54. Handford, C., A.M. Tynan, J.M. Rackal, and R. Glazier, *Setting and organization of care for persons living with HIV/AIDS*. Cochrane Database of Systematic Reviews, 2006(3) DOI: 10.1002/14651858.CD004348.pub2.

55. Horvath, T., H. Azman, G.E. Kennedy, and G.W. Rutherford, *Mobile phone text messaging for promoting adherence to antiretroviral therapy in patients with HIV infection*. Cochrane Database of Systematic Reviews, 2012(3) DOI: 10.1002/14651858.CD009756.
56. Inglis, S.C., et al., *Structured telephone support or non-invasive telemonitoring for patients with heart failure*. Cochrane Database of Systematic Reviews, 2015(10) DOI: 10.1002/14651858.CD007228.pub3.
57. Jacobson Vann, J.C., et al., *Patient reminder and recall interventions to improve immunization rates*. Cochrane Database of Systematic Reviews, 2018(1) DOI: 10.1002/14651858.CD003941.pub3.
58. Janjua, S., et al., *Digital interventions for the management of chronic obstructive pulmonary disease*. Cochrane Database of Systematic Reviews, 2021(4) DOI: 10.1002/14651858.CD013246.pub2.
59. Janjua, S., et al., *Telehealth interventions: remote monitoring and consultations for people with chronic obstructive pulmonary disease (COPD)*. Cochrane Database of Systematic Reviews, 2021(7) DOI: 10.1002/14651858.CD013196.pub2.
60. Jawad, A., I. Jawad, and N.A. Alwan, *Interventions using social networking sites to promote contraception in women of reproductive age*. Cochrane Database of Systematic Reviews, 2019(3) DOI: 10.1002/14651858.CD012521.pub2.
61. Kaner, E.F.S., et al., *Personalised digital interventions for reducing hazardous and harmful alcohol consumption in community-dwelling populations*. Cochrane Database of Systematic Reviews, 2017(9) DOI: 10.1002/14651858.CD011479.pub2.
62. Kauppi, K., et al., *Information and communication technology based prompting for treatment compliance for people with serious mental illness*. Cochrane Database of Systematic Reviews, 2014(6) DOI: 10.1002/14651858.CD009960.pub2.
63. Kew, K.M. and C.J. Cates, *Home telemonitoring and remote feedback between clinic visits for asthma*. Cochrane Database of Systematic Reviews, 2016(8) DOI: 10.1002/14651858.CD011714.pub2.
64. Kew, K.M. and C.J. Cates, *Remote versus face-to-face check-ups for asthma*. Cochrane Database of Systematic Reviews, 2016(4) DOI: 10.1002/14651858.CD011715.pub2.
65. Khan, F., B. Amatya, J. Kesselring, and M. Galea, *Telerehabilitation for persons with multiple sclerosis*. Cochrane Database of Systematic Reviews, 2015(4) DOI: 10.1002/14651858.CD010508.pub2.
66. Kobayashi, S., et al., *Assessment and support during early labour for improving birth outcomes*. Cochrane Database of Systematic Reviews, 2017(4) DOI: 10.1002/14651858.CD011516.pub2.
67. Kuster, A.T., et al., *Computer-based versus in-person interventions for preventing and reducing stress in workers*. Cochrane Database of Systematic Reviews, 2017(8) DOI: 10.1002/14651858.CD011899.pub2.
68. Lavender, T., et al., *Telephone support for women during pregnancy and the first six weeks postpartum*. Cochrane Database of Systematic Reviews, 2013(7) DOI: 10.1002/14651858.CD009338.pub2.
69. Laver, K.E., et al., *Telerehabilitation services for stroke*. Cochrane Database of Systematic Reviews, 2020(1) DOI: 10.1002/14651858.CD010255.pub3.
70. Laver, K.E., et al., *Virtual reality for stroke rehabilitation*. Cochrane Database of Systematic Reviews, 2017(11) DOI: 10.1002/14651858.CD008349.pub4.
71. Leon, N., et al., *Routine Health Information System (RHIS) improvements for strengthened health system management*. Cochrane Database of Systematic Reviews, 2020(8) DOI: 10.1002/14651858.CD012012.pub2.
72. Linden, M., et al., *Technological aids for the rehabilitation of memory and executive functioning in children and adolescents with acquired brain injury*. Cochrane Database of Systematic Reviews, 2016(7) DOI: 10.1002/14651858.CD011020.pub2.

73. Lins, S., et al., *Efficacy and experiences of telephone counselling for informal carers of people with dementia*. Cochrane Database of Systematic Reviews, 2014(9) DOI: 10.1002/14651858.CD009126.pub2.
74. Lopez, L.M., et al., *Behavioral interventions for improving dual-method contraceptive use*. Cochrane Database of Systematic Reviews, 2014(3) DOI: 10.1002/14651858.CD010915.pub2.
75. Lynch, E.A., et al., *Activity monitors for increasing physical activity in adult stroke survivors*. Cochrane Database of Systematic Reviews, 2018(7) DOI: 10.1002/14651858.CD012543.pub2.
76. Malaguti, C., S. Dal Corso, S. Janjua, and A.E. Holland, *Supervised maintenance programmes following pulmonary rehabilitation compared to usual care for chronic obstructive pulmonary disease*. Cochrane Database of Systematic Reviews, 2021(8) DOI: 10.1002/14651858.CD013569.pub2.
77. Manyande, A., et al., *Non-pharmacological interventions for assisting the induction of anaesthesia in children*. Cochrane Database of Systematic Reviews, 2015(7) DOI: 10.1002/14651858.CD006447.pub3.
78. Marcano Belisario, J.S., et al., *Smartphone and tablet self management apps for asthma*. Cochrane Database of Systematic Reviews, 2013(11) DOI: 10.1002/14651858.CD010013.pub2.
79. Marcano Belisario, J.S., et al., *Comparison of self-administered survey questionnaire responses collected using mobile apps versus other methods*. Cochrane Database of Systematic Reviews, 2015(7) DOI: 10.1002/14651858.MR000042.pub2.
80. Martin, S., et al., *Smart home technologies for health and social care support*. Cochrane Database of Systematic Reviews, 2008(4) DOI: 10.1002/14651858.CD006412.pub2.
81. Matkin, W., J.M. Ordóñez-Mena, and J. Hartmann-Boyce, *Telephone counselling for smoking cessation*. Cochrane Database of Systematic Reviews, 2019(5) DOI: 10.1002/14651858.CD002850.pub4.
82. Mayo-Wilson, E. and P. Montgomery, *Media-delivered cognitive behavioural therapy and behavioural therapy (self-help) for anxiety disorders in adults*. Cochrane Database of Systematic Reviews, 2013(9) DOI: 10.1002/14651858.CD005330.pub4.
83. McCabe, C., M. McCann, and A.M. Brady, *Computer and mobile technology interventions for self-management in chronic obstructive pulmonary disease*. Cochrane Database of Systematic Reviews, 2017(5) DOI: 10.1002/14651858.CD011425.pub2.
84. McCleery, J., J. Lavery, and T.J. Quinn, *Diagnostic test accuracy of telehealth assessment for dementia and mild cognitive impairment*. Cochrane Database of Systematic Reviews, 2021(7) DOI: 10.1002/14651858.CD013786.pub2.
85. McLean, S., et al., *Telehealthcare for asthma*. Cochrane Database of Systematic Reviews, 2010(10) DOI: 10.1002/14651858.CD007717.pub2.
86. McLean, S., et al., *Telehealthcare for chronic obstructive pulmonary disease*. Cochrane Database of Systematic Reviews, 2011(7) DOI: 10.1002/14651858.CD007718.pub2.
87. Meyer, B., H. Atherton, P. Sawmynaden, and J. Car, *Email for communicating results of diagnostic medical investigations to patients*. Cochrane Database of Systematic Reviews, 2012(8) DOI: 10.1002/14651858.CD007980.pub2.
88. Mistiaen, P. and E. Poot, *Telephone follow-up, initiated by a hospital-based health professional, for postdischarge problems in patients discharged from hospital to home*. Cochrane Database of Systematic Reviews, 2006(4) DOI: 10.1002/14651858.CD004510.pub3.
89. Murray, E., et al., *Interactive Health Communication Applications for people with chronic disease*. Cochrane Database of Systematic Reviews, 2005(4) DOI: 10.1002/14651858.CD004274.pub4.
90. Murtagh, E.M., et al., *Interventions outside the workplace for reducing sedentary behaviour in adults under 60 years of age*. Cochrane Database of Systematic Reviews, 2020(7) DOI: 10.1002/14651858.CD012554.pub2.
91. Nagendran, M., et al., *Virtual reality training for surgical trainees in laparoscopic surgery*. Cochrane Database of Systematic Reviews, 2013(8) DOI: 10.1002/14651858.CD006575.pub3.

92. Noone, C., et al., *Video calls for reducing social isolation and loneliness in older people: a rapid review*. Cochrane Database of Systematic Reviews, 2020(5) DOI: 10.1002/14651858.CD013632.
93. Odendaal, W.A., et al., *Health workers' perceptions and experiences of using mHealth technologies to deliver primary healthcare services: a qualitative evidence synthesis*. Cochrane Database of Systematic Reviews, 2020(3) DOI: 10.1002/14651858.CD011942.pub2.
94. Olthuis, J.V., et al., *Therapist-supported Internet cognitive behavioural therapy for anxiety disorders in adults*. Cochrane Database of Systematic Reviews, 2016(3) DOI: 10.1002/14651858.CD011565.pub2.
95. Pal, K., et al., *Computer-based diabetes self-management interventions for adults with type 2 diabetes mellitus*. Cochrane Database of Systematic Reviews, 2013(3) DOI: 10.1002/14651858.CD008776.pub2.
96. Palmer, M.J., et al., *Targeted client communication via mobile devices for improving maternal, neonatal, and child health*. Cochrane Database of Systematic Reviews, 2020(8) DOI: 10.1002/14651858.CD013679.
97. Palmer, M.J., et al., *Targeted client communication via mobile devices for improving sexual and reproductive health*. Cochrane Database of Systematic Reviews, 2020(8) DOI: 10.1002/14651858.CD013680.
98. Palmer, M.J., et al., *Mobile phone-based interventions for improving adherence to medication prescribed for the primary prevention of cardiovascular disease in adults*. Cochrane Database of Systematic Reviews, 2021(3) DOI: 10.1002/14651858.CD012675.pub3.
99. Pappas, Y., et al., *Computer-assisted versus oral-and-written family history taking for identifying people with elevated risk of type 2 diabetes mellitus*. Cochrane Database of Systematic Reviews, 2011(12) DOI: 10.1002/14651858.CD008489.pub2.
100. Petkovic, J., et al., *Behavioural interventions delivered through interactive social media for health behaviour change, health outcomes, and health equity in the adult population*. Cochrane Database of Systematic Reviews, 2021(5) DOI: 10.1002/14651858.CD012932.pub2.
101. Piomchai, P., et al., *Virtual reality training for improving the skills needed for performing surgery of the ear, nose or throat*. Cochrane Database of Systematic Reviews, 2015(9) DOI: 10.1002/14651858.CD010198.pub2.
102. Pollock, A., et al., *Interventions for improving upper limb function after stroke*. Cochrane Database of Systematic Reviews, 2014(11) DOI: 10.1002/14651858.CD010820.pub2.
103. Posadzki, P., et al., *Automated telephone communication systems for preventive healthcare and management of long-term conditions*. Cochrane Database of Systematic Reviews, 2016(12) DOI: 10.1002/14651858.CD009921.pub2.
104. Raman, P., et al., *Different methods and settings for glucose monitoring for gestational diabetes during pregnancy*. Cochrane Database of Systematic Reviews, 2017(10) DOI: 10.1002/14651858.CD011069.pub2.
105. Ream, E., et al., *Telephone interventions for symptom management in adults with cancer*. Cochrane Database of Systematic Reviews, 2020(6) DOI: 10.1002/14651858.CD007568.pub2.
106. Reeves, S., et al., *Interprofessional collaboration to improve professional practice and healthcare outcomes*. Cochrane Database of Systematic Reviews, 2017(6) DOI: 10.1002/14651858.CD000072.pub3.
107. Richards, J., M. Thorogood, M. Hillsdon, and C. Foster, *Face-to-face versus remote and web 2.0 interventions for promoting physical activity*. Cochrane Database of Systematic Reviews, 2013(9) DOI: 10.1002/14651858.CD010393.pub2.
108. Roberts, M.T., et al., *Video games for people with schizophrenia*. Cochrane Database of Systematic Reviews, 2021(2) DOI: 10.1002/14651858.CD012844.pub2.
109. Sawmynaden, P., H. Atherton, A. Majeed, and J. Car, *Email for the provision of information on disease prevention and health promotion*. Cochrane Database of Systematic Reviews, 2012(11) DOI: 10.1002/14651858.CD007982.pub2.



110. Shojania, K.G., et al., *The effects of on-screen, point of care computer reminders on processes and outcomes of care*. Cochrane Database of Systematic Reviews, 2009(3) DOI: 10.1002/14651858.CD001096.pub2.
111. Simon, N., et al., *Internet-based cognitive and behavioural therapies for post-traumatic stress disorder (PTSD) in adults*. Cochrane Database of Systematic Reviews, 2021(5) DOI: 10.1002/14651858.CD011710.pub3.
112. Sjøstrand, Å., et al., *Non-pharmacological interventions for stuttering in children six years and younger*. Cochrane Database of Systematic Reviews, 2021(9) DOI: 10.1002/14651858.CD013489.pub2.
113. Smith, C., et al., *Mobile phone-based interventions for improving contraception use*. Cochrane Database of Systematic Reviews, 2015(6) DOI: 10.1002/14651858.CD011159.pub2.
114. Smith, S., R. Calthorpe, S. Herbert, and A.R. Smyth, *Digital technology for monitoring adherence to inhaled therapies in people with cystic fibrosis*. Cochrane Database of Systematic Reviews, 2023(2) DOI: 10.1002/14651858.CD013733.pub2.
115. Stevenson, J.K., et al., *eHealth interventions for people with chronic kidney disease*. Cochrane Database of Systematic Reviews, 2019(8) DOI: 10.1002/14651858.CD012379.pub2.
116. Tailor, V., et al., *Binocular versus standard occlusion or blurring treatment for unilateral amblyopia in children aged three to eight years*. Cochrane Database of Systematic Reviews, 2022(2) DOI: 10.1002/14651858.CD011347.pub3.
117. Tan, K., P.R.F. Dear, and S.J. Newell, *Clinical decision support systems for neonatal care*. Cochrane Database of Systematic Reviews, 2005(2) DOI: 10.1002/14651858.CD004211.pub2.
118. Tan, K. and N.M. Lai, *Telemedicine for the support of parents of high-risk newborn infants*. Cochrane Database of Systematic Reviews, 2012(6) DOI: 10.1002/14651858.CD006818.pub2.
119. Taylor, G.M.J., et al., *Internet-based interventions for smoking cessation*. Cochrane Database of Systematic Reviews, 2017(9) DOI: 10.1002/14651858.CD007078.pub5.
120. Thabrew, H., et al., *E-Health interventions for anxiety and depression in children and adolescents with long-term physical conditions*. Cochrane Database of Systematic Reviews, 2018(8) DOI: 10.1002/14651858.CD012489.pub2.
121. Treanor, C.J., et al., *Non-pharmacological interventions for cognitive impairment due to systemic cancer treatment*. Cochrane Database of Systematic Reviews, 2016(8) DOI: 10.1002/14651858.CD011325.pub2.
122. Treweek, S., et al., *Strategies to improve recruitment to randomised trials*. Cochrane Database of Systematic Reviews, 2018(2) DOI: 10.1002/14651858.MR000013.pub6.
123. Tudor Car, L., S. Gentry, M. van-Velthoven, and J. Car, *Telephone communication of HIV testing results for improving knowledge of HIV infection status*. Cochrane Database of Systematic Reviews, 2013(1) DOI: 10.1002/14651858.CD009192.pub2.
124. Välimäki, M., et al., *Virtual reality for treatment compliance for people with serious mental illness*. Cochrane Database of Systematic Reviews, 2014(10) DOI: 10.1002/14651858.CD009928.pub2.
125. van-Velthoven, M., L. Tudor Car, S. Gentry, and J. Car, *Telephone delivered interventions for preventing HIV infection in HIV-negative persons*. Cochrane Database of Systematic Reviews, 2013(5) DOI: 10.1002/14651858.CD009190.pub2.
126. Vaona, A., et al., *E-learning for health professionals*. Cochrane Database of Systematic Reviews, 2018(1) DOI: 10.1002/14651858.CD011736.pub2.
127. Vasudevan, L., et al., *Birth and death notification via mobile devices: a mixed methods systematic review*. Cochrane Database of Systematic Reviews, 2021(7) DOI: 10.1002/14651858.CD012909.pub2.
128. Verbeek, J.H., et al., *Personal protective equipment for preventing highly infectious diseases due to exposure to contaminated body fluids in healthcare staff*. Cochrane Database of Systematic Reviews, 2020(5) DOI: 10.1002/14651858.CD011621.pub5.
129. Vijayaraghavan, M., et al., *Interventions to reduce tobacco use in people experiencing homelessness*. Cochrane Database of Systematic Reviews, 2020(12) DOI: 10.1002/14651858.CD013413.pub2.

130. Vodopivec-Jamsek, V., et al., *Mobile phone messaging for preventive health care*. Cochrane Database of Systematic Reviews, 2012(12) DOI: 10.1002/14651858.CD007457.pub2.
131. Wei, I., et al., *Computer-assisted versus oral-and-written dietary history taking for diabetes mellitus*. Cochrane Database of Systematic Reviews, 2011(12) DOI: 10.1002/14651858.CD008488.pub2.
132. Whitford, H.M., et al., *Breastfeeding education and support for women with twins or higher order multiples*. Cochrane Database of Systematic Reviews, 2017(2) DOI: 10.1002/14651858.CD012003.pub2.
133. Whittaker, R., et al., *Mobile phone text messaging and app-based interventions for smoking cessation*. Cochrane Database of Systematic Reviews, 2019(10) DOI: 10.1002/14651858.CD006611.pub5.
134. Wieland, L.S., et al., *Interactive computer-based interventions for weight loss or weight maintenance in overweight or obese people*. Cochrane Database of Systematic Reviews, 2012(8) DOI: 10.1002/14651858.CD007675.pub2.
135. Wilson, C., et al., *Speed cameras for the prevention of road traffic injuries and deaths*. Cochrane Database of Systematic Reviews, 2010(11) DOI: 10.1002/14651858.CD004607.pub4.
136. Wong, C.H., S. Smith, and S. Kansra, *Digital technology for early identification of exacerbations in people with cystic fibrosis*. Cochrane Database of Systematic Reviews, 2023(4) DOI: 10.1002/14651858.CD014606.pub2.
137. Xyrichis, A., et al., *Healthcare stakeholders' perceptions and experiences of factors affecting the implementation of critical care telemedicine (CCT): qualitative evidence synthesis*. Cochrane Database of Systematic Reviews, 2021(2) DOI: 10.1002/14651858.CD012876.pub2.
138. Young, T. and S. Hopewell, *Methods for obtaining unpublished data*. Cochrane Database of Systematic Reviews, 2011(11) DOI: 10.1002/14651858.MR000027.pub2.
